# Supplementary material for: Running wheel training does not change neurogenesis levels or alter working memory tasks in adult rats
Source: PeerJ. 2017 May 9;5:e2976. doi: 10.7717/peerj.2976 (PMC5426350; doi:10.7717/peerj.2976)
Supplement: Data S1 [file peerj-05-2976-s001.xlsx]

## Sheet: BASE COMPLETA
Animals	N Cod	Group	Phase	Date	Time	Weight	Trial	Response Time	Right	Left	T. total	Amont food	Alternation
A0	1	Experimental	Hab1	2013-04-28	09:00:00	450	0	300	0	0	300	4
A0	1	Experimental	Hab2	2013-04-29	09:00:00	450	0	300	0	0	300	4
A0	1	Experimental	Forz	2013-04-30	18:00:00	450	1	10	0	1	75	3
A0	1	Experimental	Forz	2013-04-30	18:00:00	450	2	20	1	0	80	0
A0	1	Experimental	Forz	2013-04-30	18:00:00	450	3	4	0	1	64	0
A0	1	Experimental	Forz	2013-04-30	18:00:00	450	4	12	1	0	82	0
A0	1	Experimental	Forz	2013-04-30	18:00:00	450	5	6	0	1	68	1
A0	1	Experimental	Forz	2013-04-30	18:00:00	450	6	7	1	0	67	1
A0	1	Experimental	Forz	2013-04-30	18:00:00	450	7	10	0	1	70	3
A0	1	Experimental	Forz	2013-04-30	18:00:00	450	8	6	1	0	66	3
A0	1	Experimental	Forz	2013-04-30	18:00:00	450	9	32	0	1	85	0
A0	1	Experimental	Forz	2013-04-30	18:00:00	450	10	33	1	0	97	0
A0	1	Experimental	Forz	2013-04-30	18:00:00	450	11	25	0	0	92	0
A0	1	Experimental	Forz	2013-04-30	18:00:00	450	12	20	0	0	90	0
A0	1	Experimental	Forz	2013-04-30	18:00:00	450	13	28	0	0	87	0
A0	1	Experimental	Forz	2013-04-30	18:00:00	450	14	30	0	0	30	0
A0	1	Experimental	Forz	2013-04-30	18:00:00	450	15	63	0	0	63	0
A0	1	Experimental	Forz	2013-04-30	18:00:00	450	16	39	0	0	39	0
A0	1	Experimental	Forz	2013-04-30	18:00:00	450	17	41	0	0	41	0
A0	1	Experimental	Forz	2013-04-30	18:00:00	450	18	43	0	0	43	0
A0	1	Experimental	Forz	2013-04-30	18:00:00	450	19	36	0	0	36	0
A0	1	Experimental	Forz	2013-04-30	18:00:00	450	20	30	0	0	30	0
A0	1	Experimental	Ele1	2013-05-01	15:30:00	450	1	32	1	0	96	0
A0	1	Experimental	Ele1	2013-05-01	15:30:00	450	2	0	0	1	117	1
A0	1	Experimental	Ele1	2013-05-01	15:30:00	450	3	10	0	1	70	2
A0	1	Experimental	Ele1	2013-05-01	15:30:00	450	4	26	1	0	111	0
A0	1	Experimental	Ele1	2013-05-01	15:30:00	450	5	35	0	0	35	0
A0	1	Experimental	Ele1	2013-05-01	15:30:00	450	6	36	0	1	130	4
A0	1	Experimental	Ele1	2013-05-01	15:30:00	450	7	33	0	0	33	0
A0	1	Experimental	Ele1	2013-05-01	15:30:00	450	8	64	0	0	64	0
A0	1	Experimental	Ele1	2013-05-01	15:30:00	450	9	30	0	1	143	0
A0	1	Experimental	Ele1	2013-05-01	15:30:00	450	10	80	0	0	80	0
A0	1	Experimental	Ele1	2013-05-01	15:30:00	450	11	33	0	0	33	0
A0	1	Experimental	Ele1	2013-05-01	15:30:00	450	12	47	0	0	47	0
A0	1	Experimental	Ele1	2013-05-01	15:30:00	450	13	42	0	0	42	0
A0	1	Experimental	Ele1	2013-05-01	15:30:00	450	14	48	0	0	48	0
A0	1	Experimental	Ele1	2013-05-01	15:30:00	450	15	40	0	0	40	0
A0	1	Experimental	Ele1	2013-05-01	15:30:00	450	16	62	0	0	62	0
A0	1	Experimental	Ele1	2013-05-01	15:30:00	450	17	40	0	0	40	0
A0	1	Experimental	Ele1	2013-05-01	15:30:00	450	18	34	0	0	34	0
A0	1	Experimental	Ele1	2013-05-01	15:30:00	450	19	40	0	0	40	0
A0	1	Experimental	Ele1	2013-05-01	15:30:00	450	20	40	0	0	40	0
TOTAL	1	Experimental	Ele1	2013-05-01	15:30:00	450		38.6	2	4	65.25	7	2
A0	1	Experimental	Ele2	2013-05-02	12:30:00	450	1	20	0	0	70	0
A0	1	Experimental	Ele2	2013-05-02	12:30:00	450	2	33	1	0	33	1
A0	1	Experimental	Ele2	2013-05-02	12:30:00	450	3	30	0	0	30	0
A0	1	Experimental	Ele2	2013-05-02	12:30:00	450	4	32	0	0	32	0
A0	1	Experimental	Ele2	2013-05-02	12:30:00	450	5	30	0	0	30	0
A0	1	Experimental	Ele2	2013-05-02	12:30:00	450	6	39	0	0	39	0
A0	1	Experimental	Ele2	2013-05-02	12:30:00	450	7	42	0	0	42	0
A0	1	Experimental	Ele2	2013-05-02	12:30:00	450	8	53	0	1	120	6
A0	1	Experimental	Ele2	2013-05-02	12:30:00	450	9	47	0	0	47	0
A0	1	Experimental	Ele2	2013-05-02	12:30:00	450	10	42	0	0	42	0
A0	1	Experimental	Ele2	2013-05-02	12:30:00	450	11	32	1	0	108	5
A0	1	Experimental	Ele2	2013-05-02	12:30:00	450	12	43	0	0	43	0
A0	1	Experimental	Ele2	2013-05-02	12:30:00	450	13	40	0	0	40	0
A0	1	Experimental	Ele2	2013-05-02	12:30:00	450	14	46	0	0	46	0
A0	1	Experimental	Ele2	2013-05-02	12:30:00	450	15	35	0	0	35	0
A0	1	Experimental	Ele2	2013-05-02	12:30:00	450	16	34	0	0	34	0
A0	1	Experimental	Ele2	2013-05-02	12:30:00	450	17	18	0	1	90	2
A0	1	Experimental	Ele2	2013-05-02	12:30:00	450	18	39	0	0	39	0
A0	1	Experimental	Ele2	2013-05-02	12:30:00	450	19	51	0	0	51	0
A0	1	Experimental	Ele2	2013-05-02	12:30:00	450	20	36	0	1	120	2
TOTAL	1	Experimental	Ele2	2013-05-02	12:30:00	450		37.1	2	3	54.55	16	3
A0	1	Experimental	Ele3	2013-05-04	10:45:00	450	1	32	0	1	69	2
A0	1	Experimental	Ele3	2013-05-04	10:45:00	450	2	13	1	0	73	4
A0	1	Experimental	Ele3	2013-05-04	10:45:00	450	3	6	0	1	66	3
A0	1	Experimental	Ele3	2013-05-04	10:45:00	450	4	30	0	0	30	0
A0	1	Experimental	Ele3	2013-05-04	10:45:00	450	5	30	0	0	30	0
A0	1	Experimental	Ele3	2013-05-04	10:45:00	450	6	42	0	0	42	0
A0	1	Experimental	Ele3	2013-05-04	10:45:00	450	7	33	0	0	33	0
A0	1	Experimental	Ele3	2013-05-04	10:45:00	450	8	46	0	0	46	0
A0	1	Experimental	Ele3	2013-05-04	10:45:00	450	9	58	0	0	58	0
A0	1	Experimental	Ele3	2013-05-04	10:45:00	450	10	30	0	0	30	0
A0	1	Experimental	Ele3	2013-05-04	10:45:00	450	11	40	0	1	90	4
A0	1	Experimental	Ele3	2013-05-04	10:45:00	450	12	20	1	0	80	4
A0	1	Experimental	Ele3	2013-05-04	10:45:00	450	13	16	0	1	88	4
A0	1	Experimental	Ele3	2013-05-04	10:45:00	450	14	30	1	0	68	4
A0	1	Experimental	Ele3	2013-05-04	10:45:00	450	15	39	1	0	65	4
A0	1	Experimental	Ele3	2013-05-04	10:45:00	450	16	7	0	1	37	4
A0	1	Experimental	Ele3	2013-05-04	10:45:00	450	17	17	0	1	50	4
A0	1	Experimental	Ele3	2013-05-04	10:45:00	450	18	17	0	1	57	4
A0	1	Experimental	Ele3	2013-05-04	10:45:00	450	19	11	1	0	49	3
A0	1	Experimental	Ele3	2013-05-04	10:45:00	450	20	30	0	1	90	4
TOTAL	1	Experimental	Ele3	2013-05-04	10:45:00	450		27.35	5	8	57.55	48	5
A0	1	Experimental	Ele4	2013-05-06	18:45:00	450	1	25	1	0	49	4
A0	1	Experimental	Ele4	2013-05-06	18:45:00	450	2	11	0	1	39	4
A0	1	Experimental	Ele4	2013-05-06	18:45:00	450	3	9	1	0	49	4
A0	1	Experimental	Ele4	2013-05-06	18:45:00	450	4	8	0	1	31	4
A0	1	Experimental	Ele4	2013-05-06	18:45:00	450	5	14	1	0	42	4
A0	1	Experimental	Ele4	2013-05-06	18:45:00	450	6	34	1	0	34	4
A0	1	Experimental	Ele4	2013-05-06	18:45:00	450	7	15	1	0	44	4
A0	1	Experimental	Ele4	2013-05-06	18:45:00	450	8	8	0	1	47	4
A0	1	Experimental	Ele4	2013-05-06	18:45:00	450	9	16	0	1	49	4
A0	1	Experimental	Ele4	2013-05-06	18:45:00	450	10	22	1	0	49	3
A0	1	Experimental	Ele4	2013-05-06	18:45:00	450	11	12	1	0	53	4
A0	1	Experimental	Ele4	2013-05-06	18:45:00	450	12	5	0	1	45	3
A0	1	Experimental	Ele4	2013-05-06	18:45:00	450	13	8	1	0	40	4
A0	1	Experimental	Ele4	2013-05-06	18:45:00	450	14	7	0	1	41	4
A0	1	Experimental	Ele4	2013-05-06	18:45:00	450	15	30	0	0	30	0
A0	1	Experimental	Ele4	2013-05-06	18:45:00	450	16	15	1	0	57	0
A0	1	Experimental	Ele4	2013-05-06	18:45:00	450	17	32	0	0	30	0
A0	1	Experimental	Ele4	2013-05-06	18:45:00	450	18	6	0	1	35	2
A0	1	Experimental	Ele4	2013-05-06	18:45:00	450	19	47	0	0	47	0
A0	1	Experimental	Ele4	2013-05-06	18:45:00	450	20	36	0	0	36	0
TOTAL	1	Experimental	Ele4	2013-05-06	18:45:00	450		18	9	7	42.35	56	7
B-4V	2	Experimental	Hab1	2013-05-07	08:45:00	380	0	300	0	0	300	0
B-4V	2	Experimental	Hab2	2014-05-08	09:40:00	380	0	300	0	0	300	0
B-4V	2	Experimental	Forz	2013-05-10	08:55:00	380	1	28	1	0	86	3
B-4V	2	Experimental	Forz	2013-05-10	08:55:00	380	2	36	0	1	49	3
B-4V	2	Experimental	Forz	2013-05-10	08:55:00	380	3	30	1	0	56	3
B-4V	2	Experimental	Forz	2013-05-10	08:55:00	380	4	39	0	0	39	0
B-4V	2	Experimental	Forz	2013-05-10	08:55:00	380	5	34	0	0	34	0
B-4V	2	Experimental	Forz	2013-05-10	08:55:00	380	6	41	0	0	41	0
B-4V	2	Experimental	Forz	2013-05-10	08:55:00	380	7	30	0	0	30	0
B-4V	2	Experimental	Forz	2013-05-10	08:55:00	380	8	7	0	1	35	3
B-4V	2	Experimental	Forz	2013-05-10	08:55:00	380	9	37	0	0	37	0
B-4V	2	Experimental	Forz	2013-05-10	08:55:00	380	10	54	0	0	54	0
B-4V	2	Experimental	Forz	2013-05-10	08:55:00	380	11	42	0	0	42	0
B-4V	2	Experimental	Forz	2013-05-10	08:55:00	380	12	43	0	0	43	0
B-4V	2	Experimental	Forz	2013-05-10	08:55:00	380	13	51	0	0	51	0
B-4V	2	Experimental	Forz	2013-05-10	08:55:00	380	14	15	0	1	56	2
B-4V	2	Experimental	Forz	2013-05-10	08:55:00	380	15	31	0	0	31	0
B-4V	2	Experimental	Forz	2013-05-10	08:55:00	380	16	30	0	0	30	0
B-4V	2	Experimental	Forz	2013-05-10	08:55:00	380	17	19	0	0	19	0
B-4V	2	Experimental	Forz	2013-05-10	08:55:00	380	18	30	0	0	30	0
B-4V	2	Experimental	Forz	2013-05-10	08:55:00	380	19	47	0	0	47	0
B-4V	2	Experimental	Forz	2013-05-10	08:55:00	380	20	47	0	0	47	0
B-4V	2	Experimental	Ele1	2013-05-11	12:00:00	380	1	14	0	1	66	4
B-4V	2	Experimental	Ele1	2013-05-11	12:00:00	380	2	45	0	0	45	0
B-4V	2	Experimental	Ele1	2013-05-11	12:00:00	380	3	54	0	0	54	0
B-4V	2	Experimental	Ele1	2013-05-11	12:00:00	380	4	49	0	0	49	0
B-4V	2	Experimental	Ele1	2013-05-11	12:00:00	380	5	30	0	0	91	4
B-4V	2	Experimental	Ele1	2013-05-11	12:00:00	380	6	72	0	0	72	0
B-4V	2	Experimental	Ele1	2013-05-11	12:00:00	380	7	48	0	0	48	0
B-4V	2	Experimental	Ele1	2013-05-11	12:00:00	380	8	40	0	0	40	0
B-4V	2	Experimental	Ele1	2013-05-11	12:00:00	380	9	42	0	0	42	0
B-4V	2	Experimental	Ele1	2013-05-11	12:00:00	380	10	50	0	0	50	0
B-4V	2	Experimental	Ele1	2013-05-11	12:00:00	380	11	48	0	0	48	0
B-4V	2	Experimental	Ele1	2013-05-11	12:00:00	380	12	21	1	0	120	4
B-4V	2	Experimental	Ele1	2013-05-11	12:00:00	380	13	47	0	0	47	0
B-4V	2	Experimental	Ele1	2013-05-11	12:00:00	380	14	36	0	0	36	0
B-4V	2	Experimental	Ele1	2013-05-11	12:00:00	380	15	58	0	0	58	0
B-4V	2	Experimental	Ele1	2013-05-11	12:00:00	380	16	15	1	0	73	3
B-4V	2	Experimental	Ele1	2013-05-11	12:00:00	380	17	45	0	0	45	0
B-4V	2	Experimental	Ele1	2013-05-11	12:00:00	380	18	63	0	0	63	0
B-4V	2	Experimental	Ele1	2013-05-11	12:00:00	380	19	36	0	0	36	0
B-4V	2	Experimental	Ele1	2013-05-11	12:00:00	380	20	45	0	0	45	0
TOTAL	2	Experimental	Ele1	2013-05-11	12:00:00	380		42.9	2	1	56.4	15	1
B-4V	2	Experimental	Ele2	2013-05-12	11:50:00	380	1	27	0	1	56	4
B-4V	2	Experimental	Ele2	2013-05-12	11:50:00	380	2	8	1	0	48	4
B-4V	2	Experimental	Ele2	2013-05-12	11:50:00	380	3	5	0	1	50	3
B-4V	2	Experimental	Ele2	2013-05-12	11:50:00	380	4	7	1	0	53	2
B-4V	2	Experimental	Ele2	2013-05-12	11:50:00	380	5	6	1	0	54	4
B-4V	2	Experimental	Ele2	2013-05-12	11:50:00	380	6	45	0	0	45	0
B-4V	2	Experimental	Ele2	2013-05-12	11:50:00	380	7	43	0	0	43	0
B-4V	2	Experimental	Ele2	2013-05-12	11:50:00	380	8	41	0	0	41	0
B-4V	2	Experimental	Ele2	2013-05-12	11:50:00	380	9	33	0	0	33	0
B-4V	2	Experimental	Ele2	2013-05-12	11:50:00	380	10	44	0	0	44	0
B-4V	2	Experimental	Ele2	2013-05-12	11:50:00	380	11	20	1	0	20	0
B-4V	2	Experimental	Ele2	2013-05-12	11:50:00	380	12	39	0	0	39	0
B-4V	2	Experimental	Ele2	2013-05-12	11:50:00	380	13	35	0	0	35	0
B-4V	2	Experimental	Ele2	2013-05-12	11:50:00	380	14	83	0	0	83	0
B-4V	2	Experimental	Ele2	2013-05-12	11:50:00	380	15	37	0	0	37	0
B-4V	2	Experimental	Ele2	2013-05-12	11:50:00	380	16	39	0	0	39	0
B-4V	2	Experimental	Ele2	2013-05-12	11:50:00	380	17	30	0	0	30	0
B-4V	2	Experimental	Ele2	2013-05-12	11:50:00	380	18	56	0	0	56	0
B-4V	2	Experimental	Ele2	2013-05-12	11:50:00	380	19	43	0	0	43	0
B-4V	2	Experimental	Ele2	2013-05-12	11:50:00	380	20	52	0	0	52	0
TOTAL	2	Experimental	Ele2	2013-05-12	11:50:00	380		34.65	4	2	45.05	17	2
B-4V	2	Experimental	Ele3	2013-05-13	12:12:00	380	1	6	0	1	47	4
B-4V	2	Experimental	Ele3	2013-05-13	12:12:00	380	2	7	0	1	50	4
B-4V	2	Experimental	Ele3	2013-05-13	12:12:00	380	3	8	1	0	53	4
B-4V	2	Experimental	Ele3	2013-05-13	12:12:00	380	4	60	0	0	60	0
B-4V	2	Experimental	Ele3	2013-05-13	12:12:00	380	5	48	0	0	48	0
B-4V	2	Experimental	Ele3	2013-05-13	12:12:00	380	6	9	1	0	49	3
B-4V	2	Experimental	Ele3	2013-05-13	12:12:00	380	7	57	0	0	57	0
B-4V	2	Experimental	Ele3	2013-05-13	12:12:00	380	8	30	0	0	30	0
B-4V	2	Experimental	Ele3	2013-05-13	12:12:00	380	9	30	0	0	30	0
B-4V	2	Experimental	Ele3	2013-05-13	12:12:00	380	10	60	0	0	60	0
B-4V	2	Experimental	Ele3	2013-05-13	12:12:00	380	11	30	0	0	30	0
B-4V	2	Experimental	Ele3	2013-05-13	12:12:00	380	12	30	0	0	30	0
B-4V	2	Experimental	Ele3	2013-05-13	12:12:00	380	13	30	0	0	30	0
B-4V	2	Experimental	Ele3	2013-05-13	12:12:00	380	14	60	0	0	60	0
B-4V	2	Experimental	Ele3	2013-05-13	12:12:00	380	15	58	0	0	58	0
B-4V	2	Experimental	Ele3	2013-05-13	12:12:00	380	16	35	0	0	35	0
B-4V	2	Experimental	Ele3	2013-05-13	12:12:00	380	17	40	0	0	40	0
B-4V	2	Experimental	Ele3	2013-05-13	12:12:00	380	18	49	0	0	49	0
B-4V	2	Experimental	Ele3	2013-05-13	12:12:00	380	19	40	0	0	40	0
B-4V	2	Experimental	Ele3	2013-05-13	12:12:00	380	20	30	0	0	83	4
TOTAL	2	Experimental	Ele3	2013-05-13	12:12:00	380		35.85	2	2	46.95	19	1
B-4V	2	Experimental	Ele4	2013-05-14	11:10:00	380	1	10	0	1	52	3
B-4V	2	Experimental	Ele4	2013-05-14	11:10:00	380	2	10	1	0	44	4
B-4V	2	Experimental	Ele4	2013-05-14	11:10:00	380	3	5	1	0	34	4
B-4V	2	Experimental	Ele4	2013-05-14	11:10:00	380	4	9	1	0	41	4
B-4V	2	Experimental	Ele4	2013-05-14	11:10:00	380	5	5	0	1	48	4
B-4V	2	Experimental	Ele4	2013-05-14	11:10:00	380	6	5	1	0	37	4
B-4V	2	Experimental	Ele4	2013-05-14	11:10:00	380	7	31	0	0	31	0
B-4V	2	Experimental	Ele4	2013-05-14	11:10:00	380	8	33	0	0	33	0
B-4V	2	Experimental	Ele4	2013-05-14	11:10:00	380	9	36	0	0	36	0
B-4V	2	Experimental	Ele4	2013-05-14	11:10:00	380	10	30	0	0	30	0
B-4V	2	Experimental	Ele4	2013-05-14	11:10:00	380	11	10	0	1	60	4
B-4V	2	Experimental	Ele4	2013-05-14	11:10:00	380	12	32	0	0	32	0
B-4V	2	Experimental	Ele4	2013-05-14	11:10:00	380	13	5	0	0	35	0
B-4V	2	Experimental	Ele4	2013-05-14	11:10:00	380	14	68	0	0	68	0
B-4V	2	Experimental	Ele4	2013-05-14	11:10:00	380	15	12	1	0	43	1
B-4V	2	Experimental	Ele4	2013-05-14	11:10:00	380	16	47	0	0	47	0
B-4V	2	Experimental	Ele4	2013-05-14	11:10:00	380	17	48	0	0	48	0
B-4V	2	Experimental	Ele4	2013-05-14	11:10:00	380	18	34	0	0	34	0
B-4V	2	Experimental	Ele4	2013-05-14	11:10:00	380	19	40	0	0	40	0
B-4V	2	Experimental	Ele4	2013-05-14	11:10:00	380	20	60	0	0	60	0
TOTAL	2	Experimental	Ele4	2013-05-14	11:10:00	380		26.5	5	3	42.65	28	3
B-3V	3	Experimental	Hab1	2013-05-07	08:57:00	480	0	300	0	0	300	4
B-3V	3	Experimental	Hab2	2013-05-08	09:50:00	480	0	300	0	0	300	4
B-3V	3	Experimental	Forz	2013-05-10	09:20:00	480	1	10	0	1	70	3
B-3V	3	Experimental	Forz	2013-05-10	09:20:00	480	2	13	1	0	73	1
B-3V	3	Experimental	Forz	2013-05-10	09:20:00	480	3	30	0	1	56	2
B-3V	3	Experimental	Forz	2013-05-10	09:20:00	480	4	8	1	0	88	2
B-3V	3	Experimental	Forz	2013-05-10	09:20:00	480	5	34	0	0	34	0
B-3V	3	Experimental	Forz	2013-05-10	09:20:00	480	6	56	0	0	56	0
B-3V	3	Experimental	Forz	2013-05-10	09:20:00	480	7	55	0	0	55	0
B-3V	3	Experimental	Forz	2013-05-10	09:20:00	480	8	30	1	0	75	3
B-3V	3	Experimental	Forz	2013-05-10	09:20:00	480	9	19	0	1	77	0
B-3V	3	Experimental	Forz	2013-05-10	09:20:00	480	10	39	0	0	39	0
B-3V	3	Experimental	Forz	2013-05-10	09:20:00	480	11	32	0	0	32	0
B-3V	3	Experimental	Forz	2013-05-10	09:20:00	480	12	39	0	0	39	0
B-3V	3	Experimental	Forz	2013-05-10	09:20:00	480	13	20	0	1	84	3
B-3V	3	Experimental	Forz	2013-05-10	09:20:00	480	14	15	1	0	120	0
B-3V	3	Experimental	Forz	2013-05-10	09:20:00	480	15	32	0	0	32	0
B-3V	3	Experimental	Forz	2013-05-10	09:20:00	480	16	40	0	0	40	0
B-3V	3	Experimental	Forz	2013-05-10	09:20:00	480	17	40	0	0	40	0
B-3V	3	Experimental	Forz	2013-05-10	09:20:00	480	18	30	0	0	30	0
B-3V	3	Experimental	Forz	2013-05-10	09:20:00	480	19	30	0	0	30	0
B-3V	3	Experimental	Forz	2013-05-10	09:20:00	480	20	30	0	0	30	0
B-3V	3	Experimental	Ele1	2013-05-11	12:30:00	480	1	6	1	0	83	3
B-3V	3	Experimental	Ele1	2013-05-11	12:30:00	480	2	11	1	0	53	3
B-3V	3	Experimental	Ele1	2013-05-11	12:30:00	480	3	31	0	0	31	0
B-3V	3	Experimental	Ele1	2013-05-11	12:30:00	480	4	42	0	0	42	0
B-3V	3	Experimental	Ele1	2013-05-11	12:30:00	480	5	39	0	0	39	0
B-3V	3	Experimental	Ele1	2013-05-11	12:30:00	480	6	40	0	1	85	4
B-3V	3	Experimental	Ele1	2013-05-11	12:30:00	480	7	39	0	0	39	0
B-3V	3	Experimental	Ele1	2013-05-11	12:30:00	480	8	27	0	1	66	4
B-3V	3	Experimental	Ele1	2013-05-11	12:30:00	480	9	42	0	0	42	0
B-3V	3	Experimental	Ele1	2013-05-11	12:30:00	480	10	39	0	1	79	4
B-3V	3	Experimental	Ele1	2013-05-11	12:30:00	480	11	41	0	0	41	0
B-3V	3	Experimental	Ele1	2013-05-11	12:30:00	480	12	31	0	0	31	0
B-3V	3	Experimental	Ele1	2013-05-11	12:30:00	480	13	42	1	0	82	4
B-3V	3	Experimental	Ele1	2013-05-11	12:30:00	480	14	42	0	0	42	0
B-3V	3	Experimental	Ele1	2013-05-11	12:30:00	480	15	27	0	1	57	4
B-3V	3	Experimental	Ele1	2013-05-11	12:30:00	480	16	39	0	0	39	0
B-3V	3	Experimental	Ele1	2013-05-11	12:30:00	480	17	37	0	0	37	0
B-3V	3	Experimental	Ele1	2013-05-11	12:30:00	480	18	39	0	0	39	0
B-3V	3	Experimental	Ele1	2013-05-11	12:30:00	480	19	32	0	0	32	0
B-3V	3	Experimental	Ele1	2013-05-11	12:30:00	480	20	35	0	0	35	0
TOTAL	3	Experimental	Ele1	2013-05-11	12:30:00	480		34.05	3	4	49.7	26	2
B-3V	3	Experimental	Ele2	2013-05-12	12:20:00	480	1	20	0	1	63	4
B-3V	3	Experimental	Ele2	2013-05-12	12:20:00	480	2	7	0	1	48	3
B-3V	3	Experimental	Ele2	2013-05-12	12:20:00	480	3	15	1	0	65	4
B-3V	3	Experimental	Ele2	2013-05-12	12:20:00	480	4	35	0	1	75	4
B-3V	3	Experimental	Ele2	2013-05-12	12:20:00	480	5	10	0	1	54	3
B-3V	3	Experimental	Ele2	2013-05-12	12:20:00	480	6	10	1	0	57	4
B-3V	3	Experimental	Ele2	2013-05-12	12:20:00	480	7	30	0	1	120	4
B-3V	3	Experimental	Ele2	2013-05-12	12:20:00	480	8	45	0	0	45	0
B-3V	3	Experimental	Ele2	2013-05-12	12:20:00	480	9	11	0	1	47	4
B-3V	3	Experimental	Ele2	2013-05-12	12:20:00	480	10	30	0	1	60	4
B-3V	3	Experimental	Ele2	2013-05-12	12:20:00	480	11	56	0	0	56	0
B-3V	3	Experimental	Ele2	2013-05-12	12:20:00	480	12	48	0	0	48	0
B-3V	3	Experimental	Ele2	2013-05-12	12:20:00	480	13	30	1	0	70	4
B-3V	3	Experimental	Ele2	2013-05-12	12:20:00	480	14	20	0	1	64	4
B-3V	3	Experimental	Ele2	2013-05-12	12:20:00	480	15	30	0	1	49	4
B-3V	3	Experimental	Ele2	2013-05-12	12:20:00	480	16	30	0	1	52	3
B-3V	3	Experimental	Ele2	2013-05-12	12:20:00	480	17	40	0	0	40	0
B-3V	3	Experimental	Ele2	2013-05-12	12:20:00	480	18	30	1	0	65	4
B-3V	3	Experimental	Ele2	2013-05-12	12:20:00	480	19	38	0	0	38	0
B-3V	3	Experimental	Ele2	2013-05-12	12:20:00	480	20	30	0	0	30	0
TOTAL	3	Experimental	Ele2	2013-05-12	12:20:00	480		28.25	4	10	57.3	53	4
B-3V	3	Experimental	Ele3	2013-05-13	11:00:00	480	1	12	1	0	52	4
B-3V	3	Experimental	Ele3	2013-05-13	11:00:00	480	2	5	0	1	37	4
B-3V	3	Experimental	Ele3	2013-05-13	11:00:00	480	3	30	1	0	90	3
B-3V	3	Experimental	Ele3	2013-05-13	11:00:00	480	4	36	0	0	36	0
B-3V	3	Experimental	Ele3	2013-05-13	11:00:00	480	5	66	0	0	66	0
B-3V	3	Experimental	Ele3	2013-05-13	11:00:00	480	6	51	0	0	51	0
B-3V	3	Experimental	Ele3	2013-05-13	11:00:00	480	7	36	0	0	36	0
B-3V	3	Experimental	Ele3	2013-05-13	11:00:00	480	8	58	0	0	58	0
B-3V	3	Experimental	Ele3	2013-05-13	11:00:00	480	9	40	0	0	40	0
B-3V	3	Experimental	Ele3	2013-05-13	11:00:00	480	10	30	0	0	30	0
B-3V	3	Experimental	Ele3	2013-05-13	11:00:00	480	11	30	0	0	30	0
B-3V	3	Experimental	Ele3	2013-05-13	11:00:00	480	12	57	0	0	57	0
B-3V	3	Experimental	Ele3	2013-05-13	11:00:00	480	13	10	0	1	43	4
B-3V	3	Experimental	Ele3	2013-05-13	11:00:00	480	14	37	0	0	37	0
B-3V	3	Experimental	Ele3	2013-05-13	11:00:00	480	15	55	0	0	55	0
B-3V	3	Experimental	Ele3	2013-05-13	11:00:00	480	16	34	0	0	34	0
B-3V	3	Experimental	Ele3	2013-05-13	11:00:00	480	17	52	0	0	52	0
B-3V	3	Experimental	Ele3	2013-05-13	11:00:00	480	18	36	0	0	36	0
B-3V	3	Experimental	Ele3	2013-05-13	11:00:00	480	19	45	0	0	45	0
B-3V	3	Experimental	Ele3	2013-05-13	11:00:00	480	20	46	0	0	46	0
TOTAL	3	Experimental	Ele3	2013-05-13	11:00:00	480		38.3	2	2	46.55	15	2
B-3V	3	Experimental	Ele4	2013-05-14	12:40:00	480	1	23	0	1	81	4
B-3V	3	Experimental	Ele4	2013-05-14	12:40:00	480	2	51	0	0	51	0
B-3V	3	Experimental	Ele4	2013-05-14	12:40:00	480	3	37	0	0	37	0
B-3V	3	Experimental	Ele4	2013-05-14	12:40:00	480	4	53	0	0	53	0
B-3V	3	Experimental	Ele4	2013-05-14	12:40:00	480	5	45	0	0	45	0
B-3V	3	Experimental	Ele4	2013-05-14	12:40:00	480	6	50	0	0	50	0
B-3V	3	Experimental	Ele4	2013-05-14	12:40:00	480	7	43	0	0	43	0
B-3V	3	Experimental	Ele4	2013-05-14	12:40:00	480	8	40	0	0	40	0
B-3V	3	Experimental	Ele4	2013-05-14	12:40:00	480	9	43	0	0	43	0
B-3V	3	Experimental	Ele4	2013-05-14	12:40:00	480	10	40	0	0	40	0
B-3V	3	Experimental	Ele4	2013-05-14	12:40:00	480	11	52	0	0	52	0
B-3V	3	Experimental	Ele4	2013-05-14	12:40:00	480	12	38	0	0	38	0
B-3V	3	Experimental	Ele4	2013-05-14	12:40:00	480	13	47	0	0	47	0
B-3V	3	Experimental	Ele4	2013-05-14	12:40:00	480	14	47	0	0	47	0
B-3V	3	Experimental	Ele4	2013-05-14	12:40:00	480	15	51	0	0	51	0
B-3V	3	Experimental	Ele4	2013-05-14	12:40:00	480	16	53	0	0	53	0
B-3V	3	Experimental	Ele4	2013-05-14	12:40:00	480	17	44	0	0	44	0
B-3V	3	Experimental	Ele4	2013-05-14	12:40:00	480	18	42	0	0	42	0
B-3V	3	Experimental	Ele4	2013-05-14	12:40:00	480	19	33	0	0	33	0
B-3V	3	Experimental	Ele4	2013-05-14	12:40:00	480	20	50	0	0	50	0
TOTAL	3	Experimental	Ele4	2013-05-14	12:40:00	480		44.1	0	1	47	4	0
B-2V	4	Experimental	Hab1	2013-05-07	09:10:00	450	0	300	0	0	300	4
B-2V	4	Experimental	Hab2	2013-05-08	10:00:00	450	0	300	0	0	300	4
B-2V	4	Experimental	Forz	2013-05-10	09:50:00	450	1	10	1	0	48	3
B-2V	4	Experimental	Forz	2013-05-10	09:50:00	450	2	11	0	1	59	3
B-2V	4	Experimental	Forz	2013-05-10	09:50:00	450	3	13	1	0	60	3
B-2V	4	Experimental	Forz	2013-05-10	09:50:00	450	4	17	0	1	77	3
B-2V	4	Experimental	Forz	2013-05-10	09:50:00	450	5	20	1	0	56	3
B-2V	4	Experimental	Forz	2013-05-10	09:50:00	450	6	10	0	1	57	3
B-2V	4	Experimental	Forz	2013-05-10	09:50:00	450	7	10	1	0	63	3
B-2V	4	Experimental	Forz	2013-05-10	09:50:00	450	8	26	0	1	36	3
B-2V	4	Experimental	Forz	2013-05-10	09:50:00	450	9	18	1	0	73	3
B-2V	4	Experimental	Forz	2013-05-10	09:50:00	450	10	3	0	1	45	3
B-2V	4	Experimental	Forz	2013-05-10	09:50:00	450	11	7	1	0	41	3
B-2V	4	Experimental	Forz	2013-05-10	09:50:00	450	12	7	0	1	39	3
B-2V	4	Experimental	Forz	2013-05-10	09:50:00	450	13	5	1	0	37	3
B-2V	4	Experimental	Forz	2013-05-10	09:50:00	450	14	6	0	1	45	3
B-2V	4	Experimental	Forz	2013-05-10	09:50:00	450	15	4	1	0	22	3
B-2V	4	Experimental	Forz	2013-05-10	09:50:00	450	16	5	0	1	25	3
B-2V	4	Experimental	Forz	2013-05-10	09:50:00	450	17	10	1	0	22	3
B-2V	4	Experimental	Forz	2013-05-10	09:50:00	450	18	5	0	1	120	3
B-2V	4	Experimental	Forz	2013-05-10	09:50:00	450	19	28	1	0	52	2
B-2V	4	Experimental	Forz	2013-05-10	09:50:00	450	20	7	0	1	60	3
B-2V	4	Experimental	Ele1	2013-05-11	13:15:00	450	1	30	1	0	35	4
B-2V	4	Experimental	Ele1	2013-05-11	13:15:00	450	2	7	0	1	42	4
B-2V	4	Experimental	Ele1	2013-05-11	13:15:00	450	3	5	0	1	38	4
B-2V	4	Experimental	Ele1	2013-05-11	13:15:00	450	4	8	1	0	120	4
B-2V	4	Experimental	Ele1	2013-05-11	13:15:00	450	5	30	0	1	40	4
B-2V	4	Experimental	Ele1	2013-05-11	13:15:00	450	6	5	0	1	43	4
B-2V	4	Experimental	Ele1	2013-05-11	13:15:00	450	7	5	0	1	41	4
B-2V	4	Experimental	Ele1	2013-05-11	13:15:00	450	8	4	0	1	48	4
B-2V	4	Experimental	Ele1	2013-05-11	13:15:00	450	9	4	0	1	37	4
B-2V	4	Experimental	Ele1	2013-05-11	13:15:00	450	10	4	0	1	43	4
B-2V	4	Experimental	Ele1	2013-05-11	13:15:00	450	11	4	0	1	42	4
B-2V	4	Experimental	Ele1	2013-05-11	13:15:00	450	12	3	0	1	46	4
B-2V	4	Experimental	Ele1	2013-05-11	13:15:00	450	13	30	0	1	43	4
B-2V	4	Experimental	Ele1	2013-05-11	13:15:00	450	14	5	0	1	39	4
B-2V	4	Experimental	Ele1	2013-05-11	13:15:00	450	15	3	0	1	33	4
B-2V	4	Experimental	Ele1	2013-05-11	13:15:00	450	16	3	0	1	32	4
B-2V	4	Experimental	Ele1	2013-05-11	13:15:00	450	17	6	0	1	37	4
B-2V	4	Experimental	Ele1	2013-05-11	13:15:00	450	18	5	1	0	43	4
B-2V	4	Experimental	Ele1	2013-05-11	13:15:00	450	19	5	1	0	36	4
B-2V	4	Experimental	Ele1	2013-05-11	13:15:00	450	20	5	0	1	41	4
TOTAL	4	Experimental	Ele1	2013-05-11	13:15:00	450		8.55	4	16	43.95	80	4
B-2V	4	Experimental	Ele2	2013-05-12	13:00:00	450	1	7	0	1	33	3
B-2V	4	Experimental	Ele2	2013-05-12	13:00:00	450	2	4	0	1	44	4
B-2V	4	Experimental	Ele2	2013-05-12	13:00:00	450	3	5	0	1	65	4
B-2V	4	Experimental	Ele2	2013-05-12	13:00:00	450	4	6	1	0	41	4
B-2V	4	Experimental	Ele2	2013-05-12	13:00:00	450	5	5	0	1	43	4
B-2V	4	Experimental	Ele2	2013-05-12	13:00:00	450	6	4	0	1	34	4
B-2V	4	Experimental	Ele2	2013-05-12	13:00:00	450	7	4	0	1	53	4
B-2V	4	Experimental	Ele2	2013-05-12	13:00:00	450	8	5	0	1	32	4
B-2V	4	Experimental	Ele2	2013-05-12	13:00:00	450	9	4	1	0	31	4
B-2V	4	Experimental	Ele2	2013-05-12	13:00:00	450	10	7	1	0	30	2
B-2V	4	Experimental	Ele2	2013-05-12	13:00:00	450	11	7	0	1	41	4
B-2V	4	Experimental	Ele2	2013-05-12	13:00:00	450	12	15	1	0	42	3
B-2V	4	Experimental	Ele2	2013-05-12	13:00:00	450	13	4	0	1	55	4
B-2V	4	Experimental	Ele2	2013-05-12	13:00:00	450	14	4	0	1	38	3
B-2V	4	Experimental	Ele2	2013-05-12	13:00:00	450	15	24	0	1	64	4
B-2V	4	Experimental	Ele2	2013-05-12	13:00:00	450	16	6	0	1	51	3
B-2V	4	Experimental	Ele2	2013-05-12	13:00:00	450	17	9	1	0	120	4
B-2V	4	Experimental	Ele2	2013-05-12	13:00:00	450	18	5	0	1	42	3
B-2V	4	Experimental	Ele2	2013-05-12	13:00:00	450	19	7	1	0	55	2
B-2V	4	Experimental	Ele2	2013-05-12	13:00:00	450	20	13	0	1	75	3
TOTAL	4	Experimental	Ele2	2013-05-12	13:00:00	450		7.25	6	14	49.45	70	4
B-2V	4	Experimental	Ele3	2013-05-13	10:20:00	450	1	6	0	1	48	4
B-2V	4	Experimental	Ele3	2013-05-13	10:20:00	450	2	6	1	0	52	4
B-2V	4	Experimental	Ele3	2013-05-13	10:20:00	450	3	4	0	1	37	4
B-2V	4	Experimental	Ele3	2013-05-13	10:20:00	450	4	30	0	1	65	4
B-2V	4	Experimental	Ele3	2013-05-13	10:20:00	450	5	4	0	1	31	4
B-2V	4	Experimental	Ele3	2013-05-13	10:20:00	450	6	5	1	0	46	4
B-2V	4	Experimental	Ele3	2013-05-13	10:20:00	450	7	8	0	1	37	4
B-2V	4	Experimental	Ele3	2013-05-13	10:20:00	450	8	6	0	1	30	4
B-2V	4	Experimental	Ele3	2013-05-13	10:20:00	450	9	30	0	1	59	4
B-2V	4	Experimental	Ele3	2013-05-13	10:20:00	450	10	4	1	0	33	4
B-2V	4	Experimental	Ele3	2013-05-13	10:20:00	450	11	8	0	1	43	4
B-2V	4	Experimental	Ele3	2013-05-13	10:20:00	450	12	10	1	0	54	4
B-2V	4	Experimental	Ele3	2013-05-13	10:20:00	450	13	27	1	0	45	4
B-2V	4	Experimental	Ele3	2013-05-13	10:20:00	450	14	15	0	1	53	4
B-2V	4	Experimental	Ele3	2013-05-13	10:20:00	450	15	13	1	0	91	3
B-2V	4	Experimental	Ele3	2013-05-13	10:20:00	450	16	21	0	1	76	2
B-2V	4	Experimental	Ele3	2013-05-13	10:20:00	450	17	30	0	1	105	4
B-2V	4	Experimental	Ele3	2013-05-13	10:20:00	450	18	30	1	0	90	4
B-2V	4	Experimental	Ele3	2013-05-13	10:20:00	450	19	9	1	0	83	4
B-2V	4	Experimental	Ele3	2013-05-13	10:20:00	450	20	30	0	1	51	4
TOTAL	4	Experimental	Ele3	2013-05-13	10:20:00	450		14.8	8	12	56.45	77	8
B-2V	4	Experimental	Ele4	2013-05-14	12:10:00	450	1	7	0	1	63	4
B-2V	4	Experimental	Ele4	2013-05-14	12:10:00	450	2	12	1	0	38	4
B-2V	4	Experimental	Ele4	2013-05-14	12:10:00	450	3	3	0	1	39	4
B-2V	4	Experimental	Ele4	2013-05-14	12:10:00	450	4	4	1	0	44	4
B-2V	4	Experimental	Ele4	2013-05-14	12:10:00	450	5	4	0	1	32	4
B-2V	4	Experimental	Ele4	2013-05-14	12:10:00	450	6	4	0	1	31	4
B-2V	4	Experimental	Ele4	2013-05-14	12:10:00	450	7	4	1	0	41	4
B-2V	4	Experimental	Ele4	2013-05-14	12:10:00	450	8	4	0	1	36	4
B-2V	4	Experimental	Ele4	2013-05-14	12:10:00	450	9	4	1	0	37	4
B-2V	4	Experimental	Ele4	2013-05-14	12:10:00	450	10	10	1	0	51	4
B-2V	4	Experimental	Ele4	2013-05-14	12:10:00	450	11	4	0	1	53	4
B-2V	4	Experimental	Ele4	2013-05-14	12:10:00	450	12	5	1	0	42	4
B-2V	4	Experimental	Ele4	2013-05-14	12:10:00	450	13	5	0	1	37	4
B-2V	4	Experimental	Ele4	2013-05-14	12:10:00	450	14	30	0	1	47	4
B-2V	4	Experimental	Ele4	2013-05-14	12:10:00	450	15	7	1	0	42	4
B-2V	4	Experimental	Ele4	2013-05-14	12:10:00	450	16	6	0	1	41	4
B-2V	4	Experimental	Ele4	2013-05-14	12:10:00	450	17	10	1	0	62	4
B-2V	4	Experimental	Ele4	2013-05-14	12:10:00	450	18	7	0	1	46	4
B-2V	4	Experimental	Ele4	2013-05-14	12:10:00	450	19	6	0	1	53	4
B-2V	4	Experimental	Ele4	2013-05-14	12:10:00	450	20	19	0	1	67	4
TOTAL	4	Experimental	Ele4	2013-05-14	12:10:00	450		7.75	8	12	45.1	80	8
A-2N	5	Experimental	Hab1	2013-05-07	09:20:00	430	0	300	0	0	300	4
A-2N	5	Experimental	Hab2	2013-05-08	10:10:00	430	0	300	0	0	300	4
A-2N	5	Experimental	Forz	2013-05-10	10:20:00	430	1	30	0	1	84	1
A-2N	5	Experimental	Forz	2013-05-10	10:20:00	430	2	42	0	0	42	0
A-2N	5	Experimental	Forz	2013-05-10	10:20:00	430	3	19	0	1	79	2
A-2N	5	Experimental	Forz	2013-05-10	10:20:00	430	4	35	0	0	35	0
A-2N	5	Experimental	Forz	2013-05-10	10:20:00	430	5	35	0	0	35	0
A-2N	5	Experimental	Forz	2013-05-10	10:20:00	430	6	33	0	0	33	0
A-2N	5	Experimental	Forz	2013-05-10	10:20:00	430	7	36	0	0	36	0
A-2N	5	Experimental	Forz	2013-05-10	10:20:00	430	8	16	1	0	65	0
A-2N	5	Experimental	Forz	2013-05-10	10:20:00	430	9	30	0	1	86	2
A-2N	5	Experimental	Forz	2013-05-10	10:20:00	430	10	30	0	0	30	0
A-2N	5	Experimental	Forz	2013-05-10	10:20:00	430	11	30	0	0	30	0
A-2N	5	Experimental	Forz	2013-05-10	10:20:00	430	12	30	0	0	30	0
A-2N	5	Experimental	Forz	2013-05-10	10:20:00	430	13	30	0	0	30	0
A-2N	5	Experimental	Forz	2013-05-10	10:20:00	430	14	30	0	0	30	0
A-2N	5	Experimental	Forz	2013-05-10	10:20:00	430	15	30	0	0	30	0
A-2N	5	Experimental	Forz	2013-05-10	10:20:00	430	16	30	1	0	60	0
A-2N	5	Experimental	Forz	2013-05-10	10:20:00	430	17	30	0	0	30	0
A-2N	5	Experimental	Forz	2013-05-10	10:20:00	430	18	30	0	0	30	0
A-2N	5	Experimental	Forz	2013-05-10	10:20:00	430	19	30	0	0	30	0
A-2N	5	Experimental	Forz	2013-05-10	10:20:00	430	20	30	0	0	30	0
A-2N	5	Experimental	Ele1	2013-05-11	10:30:00	430	1	6	1	0	47	3
A-2N	5	Experimental	Ele1	2013-05-11	10:30:00	430	2	9	0	1	52	4
A-2N	5	Experimental	Ele1	2013-05-11	10:30:00	430	3	31	0	0	31	0
A-2N	5	Experimental	Ele1	2013-05-11	10:30:00	430	4	40	0	0	40	0
A-2N	5	Experimental	Ele1	2013-05-11	10:30:00	430	5	12	1	0	50	3
A-2N	5	Experimental	Ele1	2013-05-11	10:30:00	430	6	33	0	0	33	0
A-2N	5	Experimental	Ele1	2013-05-11	10:30:00	430	7	40	0	0	40	0
A-2N	5	Experimental	Ele1	2013-05-11	10:30:00	430	8	38	0	0	38	0
A-2N	5	Experimental	Ele1	2013-05-11	10:30:00	430	9	11	0	1	54	3
A-2N	5	Experimental	Ele1	2013-05-11	10:30:00	430	10	36	0	0	36	0
A-2N	5	Experimental	Ele1	2013-05-11	10:30:00	430	11	39	0	0	39	0
A-2N	5	Experimental	Ele1	2013-05-11	10:30:00	430	12	20	1	0	120	3
A-2N	5	Experimental	Ele1	2013-05-11	10:30:00	430	13	47	0	0	47	0
A-2N	5	Experimental	Ele1	2013-05-11	10:30:00	430	14	50	0	0	50	0
A-2N	5	Experimental	Ele1	2013-05-11	10:30:00	430	15	43	0	0	43	0
A-2N	5	Experimental	Ele1	2013-05-11	10:30:00	430	16	35	0	0	35	0
A-2N	5	Experimental	Ele1	2013-05-11	10:30:00	430	17	55	0	0	55	0
A-2N	5	Experimental	Ele1	2013-05-11	10:30:00	430	18	48	0	0	48	0
A-2N	5	Experimental	Ele1	2013-05-11	10:30:00	430	19	58	0	0	58	0
A-2N	5	Experimental	Ele1	2013-05-11	10:30:00	430	20	44	0	0	44	0
TOTAL	5	Experimental	Ele1	2013-05-11	10:30:00	430		34.75	3	2	48	16	2
A-2N	5	Experimental	Ele2	2013-05-12	10:40:00	430	1	11	1	0	83	3
A-2N	5	Experimental	Ele2	2013-05-12	10:40:00	430	2	39	0	0	39	1
A-2N	5	Experimental	Ele2	2013-05-12	10:40:00	430	3	39	0	0	39	0
A-2N	5	Experimental	Ele2	2013-05-12	10:40:00	430	4	46	0	0	46	0
A-2N	5	Experimental	Ele2	2013-05-12	10:40:00	430	5	35	0	0	35	0
A-2N	5	Experimental	Ele2	2013-05-12	10:40:00	430	6	50	0	0	50	0
A-2N	5	Experimental	Ele2	2013-05-12	10:40:00	430	7	51	0	0	51	0
A-2N	5	Experimental	Ele2	2013-05-12	10:40:00	430	8	44	0	0	44	0
A-2N	5	Experimental	Ele2	2013-05-12	10:40:00	430	9	45	0	0	45	0
A-2N	5	Experimental	Ele2	2013-05-12	10:40:00	430	10	60	0	0	60	0
A-2N	5	Experimental	Ele2	2013-05-12	10:40:00	430	11	54	0	0	54	0
A-2N	5	Experimental	Ele2	2013-05-12	10:40:00	430	12	36	0	0	36	0
A-2N	5	Experimental	Ele2	2013-05-12	10:40:00	430	13	40	0	0	40	0
A-2N	5	Experimental	Ele2	2013-05-12	10:40:00	430	14	37	0	0	37	0
A-2N	5	Experimental	Ele2	2013-05-12	10:40:00	430	15	40	0	0	40	0
A-2N	5	Experimental	Ele2	2013-05-12	10:40:00	430	16	52	0	0	52	0
A-2N	5	Experimental	Ele2	2013-05-12	10:40:00	430	17	30	0	0	30	0
A-2N	5	Experimental	Ele2	2013-05-12	10:40:00	430	18	38	0	0	38	0
A-2N	5	Experimental	Ele2	2013-05-12	10:40:00	430	19	57	0	0	57	0
A-2N	5	Experimental	Ele2	2013-05-12	10:40:00	430	20	38	0	0	38	0
TOTAL	5	Experimental	Ele2	2013-05-12	10:40:00	430		42.1	1	0	45.7	4	0
A-2N	5	Experimental	Ele3	2013-05-13	12:50:00	430	1	23	0	1	90	0
A-2N	5	Experimental	Ele3	2013-05-13	12:50:00	430	2	47	0	0	47	0
A-2N	5	Experimental	Ele3	2013-05-13	12:50:00	430	3	60	0	0	60	0
A-2N	5	Experimental	Ele3	2013-05-13	12:50:00	430	4	35	0	0	35	0
A-2N	5	Experimental	Ele3	2013-05-13	12:50:00	430	5	30	0	0	30	0
A-2N	5	Experimental	Ele3	2013-05-13	12:50:00	430	6	37	0	0	37	0
A-2N	5	Experimental	Ele3	2013-05-13	12:50:00	430	7	38	0	0	38	0
A-2N	5	Experimental	Ele3	2013-05-13	12:50:00	430	8	33	0	0	33	0
A-2N	5	Experimental	Ele3	2013-05-13	12:50:00	430	9	36	0	0	36	0
A-2N	5	Experimental	Ele3	2013-05-13	12:50:00	430	10	36	0	0	36	0
A-2N	5	Experimental	Ele3	2013-05-13	12:50:00	430	11	59	0	0	59	0
A-2N	5	Experimental	Ele3	2013-05-13	12:50:00	430	12	41	0	0	41	0
A-2N	5	Experimental	Ele3	2013-05-13	12:50:00	430	13	33	0	0	33	0
A-2N	5	Experimental	Ele3	2013-05-13	12:50:00	430	14	46	0	0	46	0
A-2N	5	Experimental	Ele3	2013-05-13	12:50:00	430	15	38	0	0	38	0
A-2N	5	Experimental	Ele3	2013-05-13	12:50:00	430	16	31	0	0	31	0
A-2N	5	Experimental	Ele3	2013-05-13	12:50:00	430	17	44	0	0	44	0
A-2N	5	Experimental	Ele3	2013-05-13	12:50:00	430	18	34	0	0	34	0
A-2N	5	Experimental	Ele3	2013-05-13	12:50:00	430	19	30	0	0	30	0
A-2N	5	Experimental	Ele3	2013-05-13	12:50:00	430	20	30	0	0	30	0
TOTAL	5	Experimental	Ele3	2013-05-13	12:50:00	430		38.05	0	1	41.4	0	0
A-2N	5	Experimental	Ele4	2013-05-14	10:40:00	430	1	12	0	1	72	2
A-2N	5	Experimental	Ele4	2013-05-14	10:40:00	430	2	30	0	1	79	3
A-2N	5	Experimental	Ele4	2013-05-14	10:40:00	430	3	70	0	0	70	0
A-2N	5	Experimental	Ele4	2013-05-14	10:40:00	430	4	31	0	0	31	0
A-2N	5	Experimental	Ele4	2013-05-14	10:40:00	430	5	36	0	0	36	0
A-2N	5	Experimental	Ele4	2013-05-14	10:40:00	430	6	46	0	0	46	0
A-2N	5	Experimental	Ele4	2013-05-14	10:40:00	430	7	38	0	0	38	0
A-2N	5	Experimental	Ele4	2013-05-14	10:40:00	430	8	32	0	0	32	0
A-2N	5	Experimental	Ele4	2013-05-14	10:40:00	430	9	53	0	0	53	0
A-2N	5	Experimental	Ele4	2013-05-14	10:40:00	430	10	43	0	0	43	0
A-2N	5	Experimental	Ele4	2013-05-14	10:40:00	430	11	45	0	0	45	0
A-2N	5	Experimental	Ele4	2013-05-14	10:40:00	430	12	30	1	0	90	3
A-2N	5	Experimental	Ele4	2013-05-14	10:40:00	430	13	31	0	0	31	0
A-2N	5	Experimental	Ele4	2013-05-14	10:40:00	430	14	51	0	0	51	0
A-2N	5	Experimental	Ele4	2013-05-14	10:40:00	430	15	30	0	0	30	0
A-2N	5	Experimental	Ele4	2013-05-14	10:40:00	430	16	43	0	0	43	0
A-2N	5	Experimental	Ele4	2013-05-14	10:40:00	430	17	36	0	0	36	0
A-2N	5	Experimental	Ele4	2013-05-14	10:40:00	430	18	32	0	0	32	0
A-2N	5	Experimental	Ele4	2013-05-14	10:40:00	430	19	30	0	0	30	0
A-2N	5	Experimental	Ele4	2013-05-14	10:40:00	430	20	52	0	0	52	0
TOTAL	5	Experimental	Ele4	2013-05-14	10:40:00	430		38.55	1	2	47	8	1
B-2A	6	Experimental	Hab1	2013-05-14	10:20:00	460	0	300	0	0	300	4
B-2A	6	Experimental	Hab2	2013-05-15	12:00:00	460	0	300	0	0	300	4
B-2A	6	Experimental	Forz	2013-05-16	17:10:00	460	1	12	1	0	72	1
B-2A	6	Experimental	Forz	2013-05-16	17:10:00	460	2	12	0	1	72	0
B-2A	6	Experimental	Forz	2013-05-16	17:10:00	460	3	12	1	0	72	0
B-2A	6	Experimental	Forz	2013-05-16	17:10:00	460	4	6	0	1	67	0
B-2A	6	Experimental	Forz	2013-05-16	17:10:00	460	5	9	1	0	69	1
B-2A	6	Experimental	Forz	2013-05-16	17:10:00	460	6	37	0	0	37	0
B-2A	6	Experimental	Forz	2013-05-16	17:10:00	460	7	48	0	0	48	0
B-2A	6	Experimental	Forz	2013-05-16	17:10:00	460	8	25	0	1	85	1
B-2A	6	Experimental	Forz	2013-05-16	17:10:00	460	9	23	1	0	83	0
B-2A	6	Experimental	Forz	2013-05-16	17:10:00	460	10	11	0	1	71	2
B-2A	6	Experimental	Forz	2013-05-16	17:10:00	460	11	42	0	0	42	0
B-2A	6	Experimental	Forz	2013-05-16	17:10:00	460	12	36	0	0	36	0
B-2A	6	Experimental	Forz	2013-05-16	17:10:00	460	13	40	0	0	40	0
B-2A	6	Experimental	Forz	2013-05-16	17:10:00	460	14	40	0	0	40	0
B-2A	6	Experimental	Forz	2013-05-16	17:10:00	460	15	12	1	0	72	2
B-2A	6	Experimental	Forz	2013-05-16	17:10:00	460	16	60	0	1	120	2
B-2A	6	Experimental	Forz	2013-05-16	17:10:00	460	17	17	1	0	77	1
B-2A	6	Experimental	Forz	2013-05-16	17:10:00	460	18	9	0	1	62	3
B-2A	6	Experimental	Forz	2013-05-16	17:10:00	460	19	30	1	0	65	3
B-2A	6	Experimental	Forz	2013-05-16	17:10:00	460	20	30	0	1	120	3
B-2A	6	Experimental	Ele1	2013-05-17	10:30:00	460	1	7	0	1	47	0
B-2A	6	Experimental	Ele1	2013-05-17	10:30:00	460	2	43	0	0	43	0
B-2A	6	Experimental	Ele1	2013-05-17	10:30:00	460	3	35	0	0	35	0
B-2A	6	Experimental	Ele1	2013-05-17	10:30:00	460	4	32	0	0	32	0
B-2A	6	Experimental	Ele1	2013-05-17	10:30:00	460	5	25	0	1	51	3
B-2A	6	Experimental	Ele1	2013-05-17	10:30:00	460	6	35	0	0	35	0
B-2A	6	Experimental	Ele1	2013-05-17	10:30:00	460	7	14	1	0	74	4
B-2A	6	Experimental	Ele1	2013-05-17	10:30:00	460	8	30	0	1	90	3
B-2A	6	Experimental	Ele1	2013-05-17	10:30:00	460	9	40	0	0	40	0
B-2A	6	Experimental	Ele1	2013-05-17	10:30:00	460	10	38	0	0	38	0
B-2A	6	Experimental	Ele1	2013-05-17	10:30:00	460	11	38	0	0	38	0
B-2A	6	Experimental	Ele1	2013-05-17	10:30:00	460	12	35	0	0	35	0
B-2A	6	Experimental	Ele1	2013-05-17	10:30:00	460	13	30	0	0	30	0
B-2A	6	Experimental	Ele1	2013-05-17	10:30:00	460	14	38	0	0	38	0
B-2A	6	Experimental	Ele1	2013-05-17	10:30:00	460	15	35	0	0	35	0
B-2A	6	Experimental	Ele1	2013-05-17	10:30:00	460	16	28	0	1	90	3
B-2A	6	Experimental	Ele1	2013-05-17	10:30:00	460	17	35	0	0	35	0
B-2A	6	Experimental	Ele1	2013-05-17	10:30:00	460	18	18	1	0	78	2
B-2A	6	Experimental	Ele1	2013-05-17	10:30:00	460	19	35	0	0	35	0
B-2A	6	Experimental	Ele1	2013-05-17	10:30:00	460	20	40	0	0	40	0
TOTAL	6	Experimental	Ele1	2013-05-17	10:30:00	460		31.55	2	4	46.95	15	2
B-2A	6	Experimental	Ele2	2013-05-18	10:10:00	460	1	60	1	0	102	3
B-2A	6	Experimental	Ele2	2013-05-18	10:10:00	460	2	6	0	1	46	3
B-2A	6	Experimental	Ele2	2013-05-18	10:10:00	460	3	33	0	0	33	0
B-2A	6	Experimental	Ele2	2013-05-18	10:10:00	460	4	33	0	0	33	0
B-2A	6	Experimental	Ele2	2013-05-18	10:10:00	460	5	50	1	0	110	4
B-2A	6	Experimental	Ele2	2013-05-18	10:10:00	460	6	35	0	1	84	4
B-2A	6	Experimental	Ele2	2013-05-18	10:10:00	460	7	50	1	0	112	4
B-2A	6	Experimental	Ele2	2013-05-18	10:10:00	460	8	34	0	0	34	0
B-2A	6	Experimental	Ele2	2013-05-18	10:10:00	460	9	46	0	0	46	0
B-2A	6	Experimental	Ele2	2013-05-18	10:10:00	460	10	45	1	0	92	4
B-2A	6	Experimental	Ele2	2013-05-18	10:10:00	460	11	22	1	0	120	3
B-2A	6	Experimental	Ele2	2013-05-18	10:10:00	460	12	60	0	1	110	1
B-2A	6	Experimental	Ele2	2013-05-18	10:10:00	460	13	30	0	0	30	0
B-2A	6	Experimental	Ele2	2013-05-18	10:10:00	460	14	40	0	0	40	0
B-2A	6	Experimental	Ele2	2013-05-18	10:10:00	460	15	51	0	0	51	0
B-2A	6	Experimental	Ele2	2013-05-18	10:10:00	460	16	60	1	0	131	4
B-2A	6	Experimental	Ele2	2013-05-18	10:10:00	460	17	53	0	0	53	0
B-2A	6	Experimental	Ele2	2013-05-18	10:10:00	460	18	46	0	0	46	0
B-2A	6	Experimental	Ele2	2013-05-18	10:10:00	460	19	54	1	0	114	4
B-2A	6	Experimental	Ele2	2013-05-18	10:10:00	460	20	67	0	0	67	0
TOTAL	6	Experimental	Ele2	2013-05-18	10:10:00	460		43.75	7	3	72.7	34	3
B-2A	6	Experimental	Ele3	2013-05-19	11:00:00	460	1	10	0	1	70	4
B-2A	6	Experimental	Ele3	2013-05-19	11:00:00	460	2	40	0	0	40	0
B-2A	6	Experimental	Ele3	2013-05-19	11:00:00	460	3	40	0	0	40	0
B-2A	6	Experimental	Ele3	2013-05-19	11:00:00	460	4	68	0	0	68	0
B-2A	6	Experimental	Ele3	2013-05-19	11:00:00	460	5	55	0	0	55	0
B-2A	6	Experimental	Ele3	2013-05-19	11:00:00	460	6	60	1	0	121	3
B-2A	6	Experimental	Ele3	2013-05-19	11:00:00	460	7	22	1	0	83	4
B-2A	6	Experimental	Ele3	2013-05-19	11:00:00	460	8	60	1	0	116	4
B-2A	6	Experimental	Ele3	2013-05-19	11:00:00	460	9	30	1	0	120	3
B-2A	6	Experimental	Ele3	2013-05-19	11:00:00	460	10	40	0	0	40	0
B-2A	6	Experimental	Ele3	2013-05-19	11:00:00	460	11	45	0	0	45	0
B-2A	6	Experimental	Ele3	2013-05-19	11:00:00	460	12	40	0	0	40	0
B-2A	6	Experimental	Ele3	2013-05-19	11:00:00	460	13	52	0	0	52	0
B-2A	6	Experimental	Ele3	2013-05-19	11:00:00	460	14	30	1	0	120	4
B-2A	6	Experimental	Ele3	2013-05-19	11:00:00	460	15	45	1	0	109	4
B-2A	6	Experimental	Ele3	2013-05-19	11:00:00	460	16	60	0	0	60	0
B-2A	6	Experimental	Ele3	2013-05-19	11:00:00	460	17	65	1	0	120	4
B-2A	6	Experimental	Ele3	2013-05-19	11:00:00	460	18	68	0	0	68	0
B-2A	6	Experimental	Ele3	2013-05-19	11:00:00	460	19	60	0	0	60	0
B-2A	6	Experimental	Ele3	2013-05-19	11:00:00	460	20	45	0	0	45	0
TOTAL	6	Experimental	Ele3	2013-05-19	11:00:00	460		46.75	7	1	73.6	30	1
B-2A	6	Experimental	Ele4	2013-05-20	10:30:00	460	1	14	1	0	60	4
B-2A	6	Experimental	Ele4	2013-05-20	10:30:00	460	2	10	0	1	57	4
B-2A	6	Experimental	Ele4	2013-05-20	10:30:00	460	3	30	1	0	84	4
B-2A	6	Experimental	Ele4	2013-05-20	10:30:00	460	4	30	0	0	30	0
B-2A	6	Experimental	Ele4	2013-05-20	10:30:00	460	5	25	1	0	70	4
B-2A	6	Experimental	Ele4	2013-05-20	10:30:00	460	6	42	0	0	42	0
B-2A	6	Experimental	Ele4	2013-05-20	10:30:00	460	7	30	1	0	90	3
B-2A	6	Experimental	Ele4	2013-05-20	10:30:00	460	8	32	1	0	86	4
B-2A	6	Experimental	Ele4	2013-05-20	10:30:00	460	9	36	0	0	36	0
B-2A	6	Experimental	Ele4	2013-05-20	10:30:00	460	10	50	0	0	50	0
B-2A	6	Experimental	Ele4	2013-05-20	10:30:00	460	11	30	1	0	60	4
B-2A	6	Experimental	Ele4	2013-05-20	10:30:00	460	12	13	1	0	73	2
B-2A	6	Experimental	Ele4	2013-05-20	10:30:00	460	13	56	0	0	56	0
B-2A	6	Experimental	Ele4	2013-05-20	10:30:00	460	14	60	0	0	60	0
B-2A	6	Experimental	Ele4	2013-05-20	10:30:00	460	15	8	1	0	67	3
B-2A	6	Experimental	Ele4	2013-05-20	10:30:00	460	16	51	0	0	51	0
B-2A	6	Experimental	Ele4	2013-05-20	10:30:00	460	17	37	0	0	37	0
B-2A	6	Experimental	Ele4	2013-05-20	10:30:00	460	18	48	0	0	48	0
B-2A	6	Experimental	Ele4	2013-05-20	10:30:00	460	19	33	0	0	33	0
B-2A	6	Experimental	Ele4	2013-05-20	10:30:00	460	20	50	0	0	50	0
TOTAL	6	Experimental	Ele4	2013-05-20	10:30:00	460		34.25	8	1	57	32	1
C-0	7	Experimental	Hab1	2013-06-14	14:00:00	325	0	300	0	0	300	0
C-0	7	Experimental	Hab2	2013-06-15	14:00:00	325	0	300	0	0	300	0
C-0	7	Experimental	Forz	2013-06-16	14:00:00	355	1	8	1	0	85	0
C-0	7	Experimental	Forz	2013-06-16	14:00:00	355	2	7	0	1	70	4
C-0	7	Experimental	Forz	2013-06-16	14:00:00	355	3	8	1	0	68	4
C-0	7	Experimental	Forz	2013-06-16	14:00:00	355	4	6	0	1	86	2
C-0	7	Experimental	Forz	2013-06-16	14:00:00	355	5	13	1	0	104	4
C-0	7	Experimental	Forz	2013-06-16	14:00:00	355	6	8	0	1	69	0
C-0	7	Experimental	Forz	2013-06-16	14:00:00	355	7	13	1	0	68	0
C-0	7	Experimental	Forz	2013-06-16	14:00:00	355	8	50	0	0	50	4
C-0	7	Experimental	Forz	2013-06-16	14:00:00	355	9	33	0	0	33	0
C-0	7	Experimental	Forz	2013-06-16	14:00:00	355	10	30	0	0	30	0
C-0	7	Experimental	Forz	2013-06-16	14:00:00	355	11	33	0	0	33	0
C-0	7	Experimental	Forz	2013-06-16	14:00:00	355	12	30	0	0	30	0
C-0	7	Experimental	Forz	2013-06-16	14:00:00	355	13	44	0	0	44	0
C-0	7	Experimental	Forz	2013-06-16	14:00:00	355	14	30	0	0	30	0
C-0	7	Experimental	Forz	2013-06-16	14:00:00	355	15	40	0	0	40	0
C-0	7	Experimental	Forz	2013-06-16	14:00:00	355	16	48	0	0	48	0
C-0	7	Experimental	Forz	2013-06-16	14:00:00	355	17	34	0	0	34	0
C-0	7	Experimental	Forz	2013-06-16	14:00:00	355	18	60	0	0	60	0
C-0	7	Experimental	Forz	2013-06-16	14:00:00	355	19	60	0	0	60	0
C-0	7	Experimental	Forz	2013-06-16	14:00:00	355	20	13	0	1	64	4
C-0	7	Experimental	Ele1	2013-06-18	14:00:00	350	1	14	1	0	74	4
C-0	7	Experimental	Ele1	2013-06-18	14:00:00	350	2	7	0	1	67	4
C-0	7	Experimental	Ele1	2013-06-18	14:00:00	350	3	17	1	0	74	4
C-0	7	Experimental	Ele1	2013-06-18	14:00:00	350	4	30	0	0	30	0
C-0	7	Experimental	Ele1	2013-06-18	14:00:00	350	5	30	0	0	30	0
C-0	7	Experimental	Ele1	2013-06-18	14:00:00	350	6	12	0	1	76	4
C-0	7	Experimental	Ele1	2013-06-18	14:00:00	350	7	8	0	1	70	4
C-0	7	Experimental	Ele1	2013-06-18	14:00:00	350	8	4	1	0	63	4
C-0	7	Experimental	Ele1	2013-06-18	14:00:00	350	9	3	0	1	66	4
C-0	7	Experimental	Ele1	2013-06-18	14:00:00	350	10	5	1	0	66	1
C-0	7	Experimental	Ele1	2013-06-18	14:00:00	350	11	4	0	1	64	4
C-0	7	Experimental	Ele1	2013-06-18	14:00:00	350	12	5	0	1	66	4
C-0	7	Experimental	Ele1	2013-06-18	14:00:00	350	13	2	1	0	64	4
C-0	7	Experimental	Ele1	2013-06-18	14:00:00	350	14	2	1	0	64	4
C-0	7	Experimental	Ele1	2013-06-18	14:00:00	350	15	3	1	0	63	4
C-0	7	Experimental	Ele1	2013-06-18	14:00:00	350	16	3	0	1	61	4
C-0	7	Experimental	Ele1	2013-06-18	14:00:00	350	17	2	1	0	64	4
C-0	7	Experimental	Ele1	2013-06-18	14:00:00	350	18	2	1	0	64	4
C-0	7	Experimental	Ele1	2013-06-18	14:00:00	350	19	7	1	0	69	4
C-0	7	Experimental	Ele1	2013-06-18	14:00:00	350	20	4	1	0	64	4
TOTAL	7	Experimental	Ele1	2013-06-18	14:00:00	350		8.2	11	7	62.95	69	6
C-0	7	Experimental	Ele2	2013-06-19	09:15:00	355	1	5	0	1	74	4
C-0	7	Experimental	Ele2	2013-06-19	09:15:00	355	2	5	1	0	41	4
C-0	7	Experimental	Ele2	2013-06-19	09:15:00	355	3	5	1	0	41	4
C-0	7	Experimental	Ele2	2013-06-19	09:15:00	355	4	3	1	0	30	4
C-0	7	Experimental	Ele2	2013-06-19	09:15:00	355	5	4	1	0	40	4
C-0	7	Experimental	Ele2	2013-06-19	09:15:00	355	6	4	1	0	33	4
C-0	7	Experimental	Ele2	2013-06-19	09:15:00	355	7	3	1	0	30	4
C-0	7	Experimental	Ele2	2013-06-19	09:15:00	355	8	4	1	0	35	4
C-0	7	Experimental	Ele2	2013-06-19	09:15:00	355	9	3	1	0	33	4
C-0	7	Experimental	Ele2	2013-06-19	09:15:00	355	10	4	1	0	33	4
C-0	7	Experimental	Ele2	2013-06-19	09:15:00	355	11	4	1	0	32	4
C-0	7	Experimental	Ele2	2013-06-19	09:15:00	355	12	3	1	0	35	4
C-0	7	Experimental	Ele2	2013-06-19	09:15:00	355	13	4	1	0	32	4
C-0	7	Experimental	Ele2	2013-06-19	09:15:00	355	14	5	1	0	28	4
C-0	7	Experimental	Ele2	2013-06-19	09:15:00	355	15	3	1	0	35	4
C-0	7	Experimental	Ele2	2013-06-19	09:15:00	355	16	10	0	1	58	3
C-0	7	Experimental	Ele2	2013-06-19	09:15:00	355	17	4	1	0	56	4
C-0	7	Experimental	Ele2	2013-06-19	09:15:00	355	18	3	1	0	35	4
C-0	7	Experimental	Ele2	2013-06-19	09:15:00	355	19	5	0	1	38	4
C-0	7	Experimental	Ele2	2013-06-19	09:15:00	355	20	30	1	0	60	4
TOTAL	7	Experimental	Ele2	2013-06-19	09:15:00	355		5.55	17	3	39.95	79	3
C-0	7	Experimental	Ele3	2013-06-20	18:00:00	355	1	3	1	0	55	0
C-0	7	Experimental	Ele3	2013-06-20	18:00:00	355	2	3	1	0	56	4
C-0	7	Experimental	Ele3	2013-06-20	18:00:00	355	3	2	1	0	54	4
C-0	7	Experimental	Ele3	2013-06-20	18:00:00	355	4	4	1	0	55	2
C-0	7	Experimental	Ele3	2013-06-20	18:00:00	355	5	1	1	0	54	3
C-0	7	Experimental	Ele3	2013-06-20	18:00:00	355	6	12	1	0	60	3
C-0	7	Experimental	Ele3	2013-06-20	18:00:00	355	7	14	0	1	75	4
C-0	7	Experimental	Ele3	2013-06-20	18:00:00	355	8	10	1	0	47	4
C-0	7	Experimental	Ele3	2013-06-20	18:00:00	355	9	7	1	0	45	2
C-0	7	Experimental	Ele3	2013-06-20	18:00:00	355	10	7	0	1	58	2
C-0	7	Experimental	Ele3	2013-06-20	18:00:00	355	11	2	0	1	62	4
C-0	7	Experimental	Ele3	2013-06-20	18:00:00	355	12	1	1	0	64	4
C-0	7	Experimental	Ele3	2013-06-20	18:00:00	355	13	2	1	0	60	4
C-0	7	Experimental	Ele3	2013-06-20	18:00:00	355	14	6	0	1	65	4
C-0	7	Experimental	Ele3	2013-06-20	18:00:00	355	15	1	1	0	53	4
C-0	7	Experimental	Ele3	2013-06-20	18:00:00	355	16	1	1	0	49	4
C-0	7	Experimental	Ele3	2013-06-20	18:00:00	355	17	1	1	0	57	3
C-0	7	Experimental	Ele3	2013-06-20	18:00:00	355	18	2	1	0	52	3
C-0	7	Experimental	Ele3	2013-06-20	18:00:00	355	19	2	0	1	47	3
C-0	7	Experimental	Ele3	2013-06-20	18:00:00	355	20	1	1	0	47	3
TOTAL	7	Experimental	Ele3	2013-06-20	18:00:00	355		4.1	15	5	55.75	64	5
C-0	7	Experimental	Ele4	2013-06-21	14:00:00	355	1	3	1	0	62	3
C-0	7	Experimental	Ele4	2013-06-21	14:00:00	355	2	11	1	0	63	0
C-0	7	Experimental	Ele4	2013-06-21	14:00:00	355	3	3	0	1	66	4
C-0	7	Experimental	Ele4	2013-06-21	14:00:00	355	4	2	1	0	59	0
C-0	7	Experimental	Ele4	2013-06-21	14:00:00	355	5	2	0	1	62	2
C-0	7	Experimental	Ele4	2013-06-21	14:00:00	355	6	7	1	0	65	4
C-0	7	Experimental	Ele4	2013-06-21	14:00:00	355	7	1	1	0	55	4
C-0	7	Experimental	Ele4	2013-06-21	14:00:00	355	8	5	1	0	64	4
C-0	7	Experimental	Ele4	2013-06-21	14:00:00	355	9	1	1	0	60	3
C-0	7	Experimental	Ele4	2013-06-21	14:00:00	355	10	4	1	0	57	4
C-0	7	Experimental	Ele4	2013-06-21	14:00:00	355	11	3	1	0	57	3
C-0	7	Experimental	Ele4	2013-06-21	14:00:00	355	12	2	1	0	58	2
C-0	7	Experimental	Ele4	2013-06-21	14:00:00	355	13	1	1	0	58	4
C-0	7	Experimental	Ele4	2013-06-21	14:00:00	355	14	1	1	0	54	4
C-0	7	Experimental	Ele4	2013-06-21	14:00:00	355	15	1	1	0	58	4
C-0	7	Experimental	Ele4	2013-06-21	14:00:00	355	16	6	1	0	65	4
C-0	7	Experimental	Ele4	2013-06-21	14:00:00	355	17	4	0	1	53	4
C-0	7	Experimental	Ele4	2013-06-21	14:00:00	355	18	2	1	0	54	4
C-0	7	Experimental	Ele4	2013-06-21	14:00:00	355	19	4	0	1	53	4
C-0	7	Experimental	Ele4	2013-06-21	14:00:00	355	20	5	0	1	55	4
TOTAL	7	Experimental	Ele4	2013-06-21	14:00:00	355		3.4	15	5	58.9	65	4
C-1N	8	Experimental	Hab1	2013-06-14	13:10:00	325	0	300	0	0	300	4
C-1N	8	Experimental	Hab2	2013-06-15	11:00:00	360	0	300	0	0	300	4
C-1N	8	Experimental	Forz	2013-06-16	12:30:00	360	1	54	0	0	54	0
C-1N	8	Experimental	Forz	2013-06-16	12:30:00	360	2	50	0	0	50	0
C-1N	8	Experimental	Forz	2013-06-16	12:30:00	360	3	64	0	0	64	0
C-1N	8	Experimental	Forz	2013-06-16	12:30:00	360	4	52	0	0	52	0
C-1N	8	Experimental	Forz	2013-06-16	12:30:00	360	5	54	0	0	54	0
C-1N	8	Experimental	Forz	2013-06-16	12:30:00	360	6	90	0	0	90	0
C-1N	8	Experimental	Forz	2013-06-16	12:30:00	360	7	57	0	0	57	0
C-1N	8	Experimental	Forz	2013-06-16	12:30:00	360	8	120	0	0	120	0
C-1N	8	Experimental	Forz	2013-06-16	12:30:00	360	9	60	0	0	60	0
C-1N	8	Experimental	Forz	2013-06-16	12:30:00	360	10	60	0	0	60	0
C-1N	8	Experimental	Forz	2013-06-16	12:30:00	360	11	120	0	0	120	0
C-1N	8	Experimental	Forz	2013-06-16	12:30:00	360	12	120	0	0	120	0
C-1N	8	Experimental	Forz	2013-06-16	12:30:00	360	13	90	0	0	90	0
C-1N	8	Experimental	Forz	2013-06-16	12:30:00	360	14	90	0	0	90	0
C-1N	8	Experimental	Forz	2013-06-16	12:30:00	360	15	60	0	0	60	0
C-1N	8	Experimental	Forz	2013-06-16	12:30:00	360	16	60	0	0	60	0
C-1N	8	Experimental	Forz	2013-06-16	12:30:00	360	17	60	0	0	60	0
C-1N	8	Experimental	Forz	2013-06-16	12:30:00	360	18	60	0	0	60	0
C-1N	8	Experimental	Forz	2013-06-16	12:30:00	360	19	60	0	0	60	0
C-1N	8	Experimental	Forz	2013-06-16	12:30:00	360	20	60	0	0	60	0
C-1N	8	Experimental	Ele1	2013-06-17	12:30:00	360	1	11	0	1	71	1
C-1N	8	Experimental	Ele1	2013-06-17	12:30:00	360	2	10	1	0	70	0
C-1N	8	Experimental	Ele1	2013-06-17	12:30:00	360	3	30	0	0	30	0
C-1N	8	Experimental	Ele1	2013-06-17	12:30:00	360	4	30	0	0	30	0
C-1N	8	Experimental	Ele1	2013-06-17	12:30:00	360	5	30	0	0	30	0
C-1N	8	Experimental	Ele1	2013-06-17	12:30:00	360	6	30	0	0	30	0
C-1N	8	Experimental	Ele1	2013-06-17	12:30:00	360	7	25	0	1	85	2
C-1N	8	Experimental	Ele1	2013-06-17	12:30:00	360	8	30	0	0	30	0
C-1N	8	Experimental	Ele1	2013-06-17	12:30:00	360	9	30	0	0	30	0
C-1N	8	Experimental	Ele1	2013-06-17	12:30:00	360	10	30	0	0	30	0
C-1N	8	Experimental	Ele1	2013-06-17	12:30:00	360	11	8	0	1	8	1
C-1N	8	Experimental	Ele1	2013-06-17	12:30:00	360	12	14	1	0	80	0
C-1N	8	Experimental	Ele1	2013-06-17	12:30:00	360	13	30	0	0	30	0
C-1N	8	Experimental	Ele1	2013-06-17	12:30:00	360	14	30	0	0	30	0
C-1N	8	Experimental	Ele1	2013-06-17	12:30:00	360	15	8	0	1	68	2
C-1N	8	Experimental	Ele1	2013-06-17	12:30:00	360	16	30	0	0	30	0
C-1N	8	Experimental	Ele1	2013-06-17	12:30:00	360	17	30	0	0	30	0
C-1N	8	Experimental	Ele1	2013-06-17	12:30:00	360	18	30	0	1	90	1
C-1N	8	Experimental	Ele1	2013-06-17	12:30:00	360	19	30	0	0	30	0
C-1N	8	Experimental	Ele1	2013-06-17	12:30:00	360	20	22	0	1	82	0
TOTAL	8	Experimental	Ele1	2013-06-17	12:30:00	360		24.4	2	6	45.7	7	2
C-1N	8	Experimental	Ele2	2013-06-18	12:30:00	360	1	14	1	0	77	0
C-1N	8	Experimental	Ele2	2013-06-18	12:30:00	360	2	30	0	0	30	0
C-1N	8	Experimental	Ele2	2013-06-18	12:30:00	360	3	30	0	0	30	0
C-1N	8	Experimental	Ele2	2013-06-18	12:30:00	360	4	30	0	0	30	0
C-1N	8	Experimental	Ele2	2013-06-18	12:30:00	360	5	30	0	0	30	0
C-1N	8	Experimental	Ele2	2013-06-18	12:30:00	360	6	30	0	0	30	0
C-1N	8	Experimental	Ele2	2013-06-18	12:30:00	360	7	30	0	0	30	0
C-1N	8	Experimental	Ele2	2013-06-18	12:30:00	360	8	30	0	0	30	0
C-1N	8	Experimental	Ele2	2013-06-18	12:30:00	360	9	30	0	0	30	0
C-1N	8	Experimental	Ele2	2013-06-18	12:30:00	360	10	30	0	0	30	0
C-1N	8	Experimental	Ele2	2013-06-18	12:30:00	360	11	30	0	0	30	0
C-1N	8	Experimental	Ele2	2013-06-18	12:30:00	360	12	30	0	0	30	0
C-1N	8	Experimental	Ele2	2013-06-18	12:30:00	360	13	30	0	0	30	0
C-1N	8	Experimental	Ele2	2013-06-18	12:30:00	360	14	30	0	0	30	0
C-1N	8	Experimental	Ele2	2013-06-18	12:30:00	360	15	30	0	0	30	0
C-1N	8	Experimental	Ele2	2013-06-18	12:30:00	360	16	30	0	0	30	0
C-1N	8	Experimental	Ele2	2013-06-18	12:30:00	360	17	30	0	0	30	0
C-1N	8	Experimental	Ele2	2013-06-18	12:30:00	360	18	30	0	0	30	0
C-1N	8	Experimental	Ele2	2013-06-18	12:30:00	360	19	30	0	0	30	0
C-1N	8	Experimental	Ele2	2013-06-18	12:30:00	360	20	30	0	0	30	0
TOTAL	8	Experimental	Ele2	2013-06-18	12:30:00	360		29.2	1	0	32.35	0	0
C-1N	8	Experimental	Ele3	2013-06-19	14:00:00	360	1	30	0	0	30	0
C-1N	8	Experimental	Ele3	2013-06-19	14:00:00	360	2	30	0	0	30	0
C-1N	8	Experimental	Ele3	2013-06-19	14:00:00	360	3	30	0	0	30	0
C-1N	8	Experimental	Ele3	2013-06-19	14:00:00	360	4	30	0	0	30	0
C-1N	8	Experimental	Ele3	2013-06-19	14:00:00	360	5	30	0	0	30	0
C-1N	8	Experimental	Ele3	2013-06-19	14:00:00	360	6	30	0	0	30	0
C-1N	8	Experimental	Ele3	2013-06-19	14:00:00	360	7	30	0	0	30	0
C-1N	8	Experimental	Ele3	2013-06-19	14:00:00	360	8	30	0	0	30	0
C-1N	8	Experimental	Ele3	2013-06-19	14:00:00	360	9	17	0	1	95	3
C-1N	8	Experimental	Ele3	2013-06-19	14:00:00	360	10	30	0	0	30	0
C-1N	8	Experimental	Ele3	2013-06-19	14:00:00	360	11	30	0	0	30	0
C-1N	8	Experimental	Ele3	2013-06-19	14:00:00	360	12	30	0	0	30	0
C-1N	8	Experimental	Ele3	2013-06-19	14:00:00	360	13	30	0	0	30	0
C-1N	8	Experimental	Ele3	2013-06-19	14:00:00	360	14	30	0	0	30	0
C-1N	8	Experimental	Ele3	2013-06-19	14:00:00	360	15	28	1	0	90	3
C-1N	8	Experimental	Ele3	2013-06-19	14:00:00	360	16	30	0	0	30	0
C-1N	8	Experimental	Ele3	2013-06-19	14:00:00	360	17	30	0	0	30	0
C-1N	8	Experimental	Ele3	2013-06-19	14:00:00	360	18	4	0	1	94	4
C-1N	8	Experimental	Ele3	2013-06-19	14:00:00	360	19	30	0	0	30	0
C-1N	8	Experimental	Ele3	2013-06-19	14:00:00	360	20	30	0	0	30	0
TOTAL	8	Experimental	Ele3	2013-06-18	12:30:00	360		27.95	1	2	39.45	10	1
C-1N	8	Experimental	Ele4	2013-06-20	14:00:00	360	1	30	0	0	30	0
C-1N	8	Experimental	Ele4	2013-06-20	14:00:00	360	2	30	0	0	30	0
C-1N	8	Experimental	Ele4	2013-06-20	14:00:00	360	3	30	0	0	30	0
C-1N	8	Experimental	Ele4	2013-06-20	14:00:00	360	4	30	0	0	30	0
C-1N	8	Experimental	Ele4	2013-06-20	14:00:00	360	5	30	0	0	30	0
C-1N	8	Experimental	Ele4	2013-06-20	14:00:00	360	6	30	0	0	30	0
C-1N	8	Experimental	Ele4	2013-06-20	14:00:00	360	7	30	0	0	30	0
C-1N	8	Experimental	Ele4	2013-06-20	14:00:00	360	8	30	0	0	30	0
C-1N	8	Experimental	Ele4	2013-06-20	14:00:00	360	9	30	0	0	30	0
C-1N	8	Experimental	Ele4	2013-06-20	14:00:00	360	10	30	0	0	30	0
C-1N	8	Experimental	Ele4	2013-06-20	14:00:00	360	11	30	0	0	30	0
C-1N	8	Experimental	Ele4	2013-06-20	14:00:00	360	12	8	1	0	73	3
C-1N	8	Experimental	Ele4	2013-06-20	14:00:00	360	13	3	0	1	65	2
C-1N	8	Experimental	Ele4	2013-06-20	14:00:00	360	14	30	0	0	30	0
C-1N	8	Experimental	Ele4	2013-06-20	14:00:00	360	15	13	1	0	71	2
C-1N	8	Experimental	Ele4	2013-06-20	14:00:00	360	16	10	1	0	71	1
C-1N	8	Experimental	Ele4	2013-06-20	14:00:00	360	17	30	0	0	30	0
C-1N	8	Experimental	Ele4	2013-06-20	14:00:00	360	18	30	0	0	30	0
C-1N	8	Experimental	Ele4	2013-06-20	14:00:00	360	19	11	0	1	71	3
C-1N	8	Experimental	Ele4	2013-06-20	14:00:00	360	20	22	1	0	82	2
TOTAL	8	Experimental	Ele4	2013-06-20	14:00:00	360		24.35	4	2	42.65	13	2
D-2V	9	Experimental	Hab1	2013-06-14	02:30:00	425	0	300	0	0	300	4
D-2V	9	Experimental	Hab2	2013-06-15	11:35:00	425	0	300	0	0	300	4
D-2V	9	Experimental	Forz	2013-06-16	11:00:00	375	1	14	1	0	80	1
D-2V	9	Experimental	Forz	2013-06-16	11:00:00	375	2	8	0	1	43	4
D-2V	9	Experimental	Forz	2013-06-16	11:00:00	375	3	33	0	0	33	0
D-2V	9	Experimental	Forz	2013-06-16	11:00:00	375	4	20	0	1	68	3
D-2V	9	Experimental	Forz	2013-06-16	11:00:00	375	5	37	0	0	37	0
D-2V	9	Experimental	Forz	2013-06-16	11:00:00	375	6	43	0	0	43	0
D-2V	9	Experimental	Forz	2013-06-16	11:00:00	375	7	51	0	0	51	0
D-2V	9	Experimental	Forz	2013-06-16	11:00:00	375	8	63	0	0	63	0
D-2V	9	Experimental	Forz	2013-06-16	11:00:00	375	9	41	0	0	41	0
D-2V	9	Experimental	Forz	2013-06-16	11:00:00	375	10	56	0	0	56	0
D-2V	9	Experimental	Forz	2013-06-16	11:00:00	375	11	40	0	0	40	0
D-2V	9	Experimental	Forz	2013-06-16	11:00:00	375	12	43	0	0	43	0
D-2V	9	Experimental	Forz	2013-06-16	11:00:00	375	13	30	1	0	86	4
D-2V	9	Experimental	Forz	2013-06-16	11:00:00	375	14	49	0	0	49	0
D-2V	9	Experimental	Forz	2013-06-16	11:00:00	375	15	50	0	0	50	0
D-2V	9	Experimental	Forz	2013-06-16	11:00:00	375	16	24	0	1	81	4
D-2V	9	Experimental	Forz	2013-06-16	11:00:00	375	17	28	1	0	63	4
D-2V	9	Experimental	Forz	2013-06-16	11:00:00	375	18	17	0	1	57	4
D-2V	9	Experimental	Forz	2013-06-16	11:00:00	375	19	38	0	0	38	0
D-2V	9	Experimental	Forz	2013-06-16	11:00:00	375	20	25	0	1	90	4
D-2V	9	Experimental	Ele1	2013-06-17	11:00:00	375	1	11	0	1	71	3
D-2V	9	Experimental	Ele1	2013-06-17	11:00:00	375	2	11	1	0	75	3
D-2V	9	Experimental	Ele1	2013-06-17	11:00:00	375	3	5	1	0	67	3
D-2V	9	Experimental	Ele1	2013-06-17	11:00:00	375	4	6	0	1	72	3
D-2V	9	Experimental	Ele1	2013-06-17	11:00:00	375	5	31	0	0	31	0
D-2V	9	Experimental	Ele1	2013-06-17	11:00:00	375	6	5	0	1	70	2
D-2V	9	Experimental	Ele1	2013-06-17	11:00:00	375	7	7	1	0	74	2
D-2V	9	Experimental	Ele1	2013-06-17	11:00:00	375	8	26	0	1	96	4
D-2V	9	Experimental	Ele1	2013-06-17	11:00:00	375	9	6	1	0	69	2
D-2V	9	Experimental	Ele1	2013-06-17	11:00:00	375	10	7	0	1	70	3
D-2V	9	Experimental	Ele1	2013-06-17	11:00:00	375	11	34	0	0	34	0
D-2V	9	Experimental	Ele1	2013-06-17	11:00:00	375	12	56	0	0	56	0
D-2V	9	Experimental	Ele1	2013-06-17	11:00:00	375	13	1	0	0	1	0
D-2V	9	Experimental	Ele1	2013-06-17	11:00:00	375	14	42	0	0	42	0
D-2V	9	Experimental	Ele1	2013-06-17	11:00:00	375	15	50	0	0	50	0
D-2V	9	Experimental	Ele1	2013-06-17	11:00:00	375	16	44	0	0	44	0
D-2V	9	Experimental	Ele1	2013-06-17	11:00:00	375	17	115	0	0	115	0
D-2V	9	Experimental	Ele1	2013-06-17	11:00:00	375	18	2	0	0	2	0
D-2V	9	Experimental	Ele1	2013-06-17	11:00:00	375	19	126	0	0	126	0
D-2V	9	Experimental	Ele1	2013-06-17	11:00:00	375	20	130	0	0	130	0
TOTAL	9	Experimental	Ele1	2013-06-17	11:00:00	375		35.75	4	5	64.75	25	4
D-2V	9	Experimental	Ele2	2013-06-18	11:00:00	375	1	30	0	0	30	0
D-2V	9	Experimental	Ele2	2013-06-18	11:00:00	375	2	30	0	0	30	0
D-2V	9	Experimental	Ele2	2013-06-18	11:00:00	375	3	30	0	0	30	0
D-2V	9	Experimental	Ele2	2013-06-18	11:00:00	375	4	30	0	0	30	0
D-2V	9	Experimental	Ele2	2013-06-18	11:00:00	375	5	30	0	0	30	0
D-2V	9	Experimental	Ele2	2013-06-18	11:00:00	375	6	30	0	0	30	0
D-2V	9	Experimental	Ele2	2013-06-18	11:00:00	375	7	30	0	0	30	0
D-2V	9	Experimental	Ele2	2013-06-18	11:00:00	375	8	30	0	0	30	0
D-2V	9	Experimental	Ele2	2013-06-18	11:00:00	375	9	30	0	0	30	0
D-2V	9	Experimental	Ele2	2013-06-18	11:00:00	375	10	30	0	0	30	0
D-2V	9	Experimental	Ele2	2013-06-18	11:00:00	375	11	30	0	0	30	0
D-2V	9	Experimental	Ele2	2013-06-18	11:00:00	375	12	30	0	0	30	0
D-2V	9	Experimental	Ele2	2013-06-18	11:00:00	375	13	30	0	0	30	0
D-2V	9	Experimental	Ele2	2013-06-18	11:00:00	375	14	30	0	0	30	0
D-2V	9	Experimental	Ele2	2013-06-18	11:00:00	375	15	30	0	0	30	0
D-2V	9	Experimental	Ele2	2013-06-18	11:00:00	375	16	30	0	0	30	0
D-2V	9	Experimental	Ele2	2013-06-18	11:00:00	375	17	30	0	0	30	0
D-2V	9	Experimental	Ele2	2013-06-18	11:00:00	375	18	30	0	0	30	0
D-2V	9	Experimental	Ele2	2013-06-18	11:00:00	375	19	30	0	0	30	0
D-2V	9	Experimental	Ele2	2013-06-18	11:00:00	375	20	30	0	0	30	0
TOTAL	9	Experimental	Ele2	2013-06-18	11:00:00	375		30	0	0	30	0	0
D-2V	9	Experimental	Ele3	2013-06-19	11:00:00	375	1	30	0	1	85	4
D-2V	9	Experimental	Ele3	2013-06-19	11:00:00	375	2	22	1	0	66	4
D-2V	9	Experimental	Ele3	2013-06-19	11:00:00	375	3	30	0	0	30	0
D-2V	9	Experimental	Ele3	2013-06-19	11:00:00	375	4	30	0	0	30	0
D-2V	9	Experimental	Ele3	2013-06-19	11:00:00	375	5	42	0	0	42	0
D-2V	9	Experimental	Ele3	2013-06-19	11:00:00	375	6	30	0	1	89	4
D-2V	9	Experimental	Ele3	2013-06-19	11:00:00	375	7	6	0	1	48	4
D-2V	9	Experimental	Ele3	2013-06-19	11:00:00	375	8	5	1	0	43	4
D-2V	9	Experimental	Ele3	2013-06-19	11:00:00	375	9	4	1	0	35	4
D-2V	9	Experimental	Ele3	2013-06-19	11:00:00	375	10	40	0	0	40	0
D-2V	9	Experimental	Ele3	2013-06-19	11:00:00	375	11	35	0	0	35	0
D-2V	9	Experimental	Ele3	2013-06-19	11:00:00	375	12	5	0	1	53	4
D-2V	9	Experimental	Ele3	2013-06-19	11:00:00	375	13	3	1	0	46	4
D-2V	9	Experimental	Ele3	2013-06-19	11:00:00	375	14	4	0	1	32	4
D-2V	9	Experimental	Ele3	2013-06-19	11:00:00	375	15	30	0	0	30	0
D-2V	9	Experimental	Ele3	2013-06-19	11:00:00	375	16	30	0	1	35	4
D-2V	9	Experimental	Ele3	2013-06-19	11:00:00	375	17	40	0	0	40	0
D-2V	9	Experimental	Ele3	2013-06-19	11:00:00	375	18	4	0	1	35	4
D-2V	9	Experimental	Ele3	2013-06-19	11:00:00	375	19	23	0	1	54	4
D-2V	9	Experimental	Ele3	2013-06-19	11:00:00	375	20	3	1	0	55	4
TOTAL	9	Experimental	Ele3	2013-06-19	11:00:00	375		20.8	5	8	46.15	52	5
D-2V	9	Experimental	Ele4	2013-06-20	11:00:00	375	1	3	0	1	60	4
D-2V	9	Experimental	Ele4	2013-06-20	11:00:00	375	2	2	1	0	62	4
D-2V	9	Experimental	Ele4	2013-06-20	11:00:00	375	3	2	1	0	60	3
D-2V	9	Experimental	Ele4	2013-06-20	11:00:00	375	4	2	0	1	63	3
D-2V	9	Experimental	Ele4	2013-06-20	11:00:00	375	5	4	1	0	65	3
D-2V	9	Experimental	Ele4	2013-06-20	11:00:00	375	6	14	0	1	73	2
D-2V	9	Experimental	Ele4	2013-06-20	11:00:00	375	7	14	1	0	70	3
D-2V	9	Experimental	Ele4	2013-06-20	11:00:00	375	8	30	0	0	60	0
D-2V	9	Experimental	Ele4	2013-06-20	11:00:00	375	9	3	1	0	64	3
D-2V	9	Experimental	Ele4	2013-06-20	11:00:00	375	10	2	1	0	62	2
D-2V	9	Experimental	Ele4	2013-06-20	11:00:00	375	11	2	1	0	62	3
D-2V	9	Experimental	Ele4	2013-06-20	11:00:00	375	12	2	1	0	61	3
D-2V	9	Experimental	Ele4	2013-06-20	11:00:00	375	13	2	1	0	64	3
D-2V	9	Experimental	Ele4	2013-06-20	11:00:00	375	14	9	1	0	68	3
D-2V	9	Experimental	Ele4	2013-06-20	11:00:00	375	15	2	1	0	59	3
D-2V	9	Experimental	Ele4	2013-06-20	11:00:00	375	16	2	1	0	60	3
D-2V	9	Experimental	Ele4	2013-06-20	11:00:00	375	17	2	1	0	59	3
D-2V	9	Experimental	Ele4	2013-06-20	11:00:00	375	18	2	1	0	55	4
D-2V	9	Experimental	Ele4	2013-06-20	11:00:00	375	19	4	1	0	62	4
D-2V	9	Experimental	Ele4	2013-06-20	11:00:00	375	20	4	1	0	60	3
TOTAL	9	Experimental	Ele4	2013-06-20	11:00:00	375		5.35	16	3	62.45	59	3
D-3V	10	Experimental	Hab1	2013-06-14	14:30:00	350	0	300	0	0	300	4
D-3V	10	Experimental	Hab2	2013-06-15	12:00:00	350	0	300	0	0	300	4
D-3V	10	Experimental	Forz	2013-06-16	11:55:00	325	1	30	1	0	78	4
D-3V	10	Experimental	Forz	2013-06-16	11:55:00	325	2	16	0	1	57	4
D-3V	10	Experimental	Forz	2013-06-16	11:55:00	325	3	12	1	0	50	4
D-3V	10	Experimental	Forz	2013-06-16	11:55:00	325	4	8	0	1	45	4
D-3V	10	Experimental	Forz	2013-06-16	11:55:00	325	5	8	1	0	51	4
D-3V	10	Experimental	Forz	2013-06-16	11:55:00	325	6	6	0	1	39	4
D-3V	10	Experimental	Forz	2013-06-16	11:55:00	325	7	40	0	0	40	4
D-3V	10	Experimental	Forz	2013-06-16	11:55:00	325	8	8	0	1	46	0
D-3V	10	Experimental	Forz	2013-06-16	11:55:00	325	9	5	1	0	54	4
D-3V	10	Experimental	Forz	2013-06-16	11:55:00	325	10	4	0	1	41	2
D-3V	10	Experimental	Forz	2013-06-16	11:55:00	325	11	9	1	0	39	4
D-3V	10	Experimental	Forz	2013-06-16	11:55:00	325	12	4	0	1	30	3
D-3V	10	Experimental	Forz	2013-06-16	11:55:00	325	13	10	1	0	50	4
D-3V	10	Experimental	Forz	2013-06-16	11:55:00	325	14	16	0	1	36	4
D-3V	10	Experimental	Forz	2013-06-16	11:55:00	325	15	7	1	0	35	4
D-3V	10	Experimental	Forz	2013-06-16	11:55:00	325	16	6	0	1	36	4
D-3V	10	Experimental	Forz	2013-06-16	11:55:00	325	17	4	1	0	40	4
D-3V	10	Experimental	Forz	2013-06-16	11:55:00	325	18	14	0	1	46	4
D-3V	10	Experimental	Forz	2013-06-16	11:55:00	325	19	7	1	0	54	4
D-3V	10	Experimental	Forz	2013-06-16	11:55:00	325	20	5	0	1	120	4
D-3V	10	Experimental	Ele1	2013-06-17	11:55:00	305	1	12	0	1	77	4
D-3V	10	Experimental	Ele1	2013-06-17	11:55:00	305	2	4	1	0	69	4
D-3V	10	Experimental	Ele1	2013-06-17	11:55:00	305	3	4	1	0	69	4
D-3V	10	Experimental	Ele1	2013-06-17	11:55:00	305	4	2	1	0	70	4
D-3V	10	Experimental	Ele1	2013-06-17	11:55:00	305	5	2	1	0	67	4
D-3V	10	Experimental	Ele1	2013-06-17	11:55:00	305	6	3	0	1	62	4
D-3V	10	Experimental	Ele1	2013-06-17	11:55:00	305	7	2	1	0	64	4
D-3V	10	Experimental	Ele1	2013-06-17	11:55:00	305	8	2	0	1	62	4
D-3V	10	Experimental	Ele1	2013-06-17	11:55:00	305	9	2	0	1	62	4
D-3V	10	Experimental	Ele1	2013-06-17	11:55:00	305	10	2	1	0	62	4
D-3V	10	Experimental	Ele1	2013-06-17	11:55:00	305	11	2	0	1	62	4
D-3V	10	Experimental	Ele1	2013-06-17	11:55:00	305	12	19	0	1	80	4
D-3V	10	Experimental	Ele1	2013-06-17	11:55:00	305	13	2	1	0	60	4
D-3V	10	Experimental	Ele1	2013-06-17	11:55:00	305	14	1	0	1	38	3
D-3V	10	Experimental	Ele1	2013-06-17	11:55:00	305	15	2	0	1	39	4
D-3V	10	Experimental	Ele1	2013-06-17	11:55:00	305	16	25	1	0	80	3
D-3V	10	Experimental	Ele1	2013-06-17	11:55:00	305	17	5	1	0	63	4
D-3V	10	Experimental	Ele1	2013-06-17	11:55:00	305	18	10	0	1	74	4
D-3V	10	Experimental	Ele1	2013-06-17	11:55:00	305	19	13	1	0	67	4
D-3V	10	Experimental	Ele1	2013-06-17	11:55:00	305	20	12	0	1	62	2
TOTAL	10	Experimental	Ele1	2013-06-17	11:55:00	305		6.3	10	10	64.45	76	8
D-3V	10	Experimental	Ele2	2013-06-18	11:55:00	325	1	11	0	1	71	4
D-3V	10	Experimental	Ele2	2013-06-18	11:55:00	325	2	7	0	1	71	4
D-3V	10	Experimental	Ele2	2013-06-18	11:55:00	325	3	5	0	1	60	4
D-3V	10	Experimental	Ele2	2013-06-18	11:55:00	325	4	15	1	0	75	4
D-3V	10	Experimental	Ele2	2013-06-18	11:55:00	325	5	4	1	0	52	4
D-3V	10	Experimental	Ele2	2013-06-18	11:55:00	325	6	18	1	0	83	4
D-3V	10	Experimental	Ele2	2013-06-18	11:55:00	325	7	6	0	1	60	4
D-3V	10	Experimental	Ele2	2013-06-18	11:55:00	325	8	4	0	1	48	4
D-3V	10	Experimental	Ele2	2013-06-18	11:55:00	325	9	7	0	1	71	4
D-3V	10	Experimental	Ele2	2013-06-18	11:55:00	325	10	5	1	0	68	4
D-3V	10	Experimental	Ele2	2013-06-18	11:55:00	325	11	4	0	1	44	4
D-3V	10	Experimental	Ele2	2013-06-18	11:55:00	325	12	7	1	0	67	4
D-3V	10	Experimental	Ele2	2013-06-18	11:55:00	325	13	10	1	0	55	4
D-3V	10	Experimental	Ele2	2013-06-18	11:55:00	325	14	8	1	0	44	4
D-3V	10	Experimental	Ele2	2013-06-18	11:55:00	325	15	30	0	0	30	4
D-3V	10	Experimental	Ele2	2013-06-18	11:55:00	325	16	21	1	0	38	4
D-3V	10	Experimental	Ele2	2013-06-18	11:55:00	325	17	26	0	1	34	4
D-3V	10	Experimental	Ele2	2013-06-18	11:55:00	325	18	18	1	0	28	4
D-3V	10	Experimental	Ele2	2013-06-18	11:55:00	325	19	30	0	0	30	4
D-3V	10	Experimental	Ele2	2013-06-18	11:55:00	325	20	30	0	0	30	4
TOTAL	10	Experimental	Ele2	2013-06-18	11:55:00	325		13.3	9	8	52.95	80	5
D-3V	10	Experimental	Ele3	2013-06-19	08:30:00	325	1	8	0	1	49	4
D-3V	10	Experimental	Ele3	2013-06-19	08:30:00	325	2	4	0	1	38	4
D-3V	10	Experimental	Ele3	2013-06-19	08:30:00	325	3	10	0	1	42	4
D-3V	10	Experimental	Ele3	2013-06-19	08:30:00	325	4	9	1	0	37	4
D-3V	10	Experimental	Ele3	2013-06-19	08:30:00	325	5	4	1	0	48	4
D-3V	10	Experimental	Ele3	2013-06-19	08:30:00	325	6	3	1	0	62	4
D-3V	10	Experimental	Ele3	2013-06-19	08:30:00	325	7	3	1	0	42	4
D-3V	10	Experimental	Ele3	2013-06-19	08:30:00	325	8	3	1	0	42	4
D-3V	10	Experimental	Ele3	2013-06-19	08:30:00	325	9	2	1	0	42	4
D-3V	10	Experimental	Ele3	2013-06-19	08:30:00	325	10	4	1	0	30	4
D-3V	10	Experimental	Ele3	2013-06-19	08:30:00	325	11	3	1	0	42	4
D-3V	10	Experimental	Ele3	2013-06-19	08:30:00	325	12	5	0	1	33	4
D-3V	10	Experimental	Ele3	2013-06-19	08:30:00	325	13	4	1	0	32	4
D-3V	10	Experimental	Ele3	2013-06-19	08:30:00	325	14	3	1	0	33	4
D-3V	10	Experimental	Ele3	2013-06-19	08:30:00	325	15	3	1	0	35	4
D-3V	10	Experimental	Ele3	2013-06-19	08:30:00	325	16	3	1	0	42	4
D-3V	10	Experimental	Ele3	2013-06-19	08:30:00	325	17	5	0	1	38	4
D-3V	10	Experimental	Ele3	2013-06-19	08:30:00	325	18	5	1	0	41	4
D-3V	10	Experimental	Ele3	2013-06-19	08:30:00	325	19	3	1	0	45	4
D-3V	10	Experimental	Ele3	2013-06-19	08:30:00	325	20	7	0	1	40	4
TOTAL	10	Experimental	Ele3	2013-06-19	08:30:00	325		4.55	14	6	40.65	80	4
D-3V	10	Experimental	Ele4	2013-06-20	08:30:00	325	1	6	0	1	38	4
D-3V	10	Experimental	Ele4	2013-06-20	08:30:00	325	2	4	1	0	27	4
D-3V	10	Experimental	Ele4	2013-06-20	08:30:00	325	3	5	0	1	30	4
D-3V	10	Experimental	Ele4	2013-06-20	08:30:00	325	4	3	0	1	48	4
D-3V	10	Experimental	Ele4	2013-06-20	08:30:00	325	5	30	0	0	30	0
D-3V	10	Experimental	Ele4	2013-06-20	08:30:00	325	6	7	1	0	67	4
D-3V	10	Experimental	Ele4	2013-06-20	08:30:00	325	7	8	0	1	64	4
D-3V	10	Experimental	Ele4	2013-06-20	08:30:00	325	8	7	1	0	65	4
D-3V	10	Experimental	Ele4	2013-06-20	08:30:00	325	9	5	1	0	50	4
D-3V	10	Experimental	Ele4	2013-06-20	08:30:00	325	10	4	0	1	48	4
D-3V	10	Experimental	Ele4	2013-06-20	08:30:00	325	11	7	1	0	68	4
D-3V	10	Experimental	Ele4	2013-06-20	08:30:00	325	12	5	0	1	67	4
D-3V	10	Experimental	Ele4	2013-06-20	08:30:00	325	13	4	0	1	31	4
D-3V	10	Experimental	Ele4	2013-06-20	08:30:00	325	14	6	0	1	72	4
D-3V	10	Experimental	Ele4	2013-06-20	08:30:00	325	15	5	1	0	63	4
D-3V	10	Experimental	Ele4	2013-06-20	08:30:00	325	16	2	0	1	68	4
D-3V	10	Experimental	Ele4	2013-06-20	08:30:00	325	17	6	0	1	53	4
D-3V	10	Experimental	Ele4	2013-06-20	08:30:00	325	18	6	0	1	67	4
D-3V	10	Experimental	Ele4	2013-06-20	08:30:00	325	19	2	0	1	67	4
D-3V	10	Experimental	Ele4	2013-06-20	08:30:00	325	20	2	0	1	62	4
TOTAL	10	Experimental	Ele4	2013-06-20	08:30:00	325		6.2	6	13	54.25	76	6
C-2R (5N)	11	Experimental	Hab1	2013-08-22	11:40:00	435	0	300	0	0	300	4
C-2R (5N)	11	Experimental	Hab2	2013-08-23	09:45:00	435	0	300	0	0	300	4
C-2R (5N)	11	Experimental	Hab3	2013-08-24	10:30:00	435	0	300	0	0	300	4
C-2R (5N)	11	Experimental	Forz	2013-08-25	10:35:00	435	1	60	1	0	300	0
C-2R (5N)	11	Experimental	Forz	2013-08-25	10:35:00	435	2	60	0	1	60	0
C-2R (5N)	11	Experimental	Forz	2013-08-25	10:35:00	435	3	60	1	0	60	0
C-2R (5N)	11	Experimental	Forz	2013-08-25	10:35:00	435	4	60	0	1	60	0
C-2R (5N)	11	Experimental	Forz	2013-08-25	10:35:00	435	5	60	1	0	60	0
C-2R (5N)	11	Experimental	Forz	2013-08-25	10:35:00	435	6	60	0	1	60	0
C-2R (5N)	11	Experimental	Forz	2013-08-25	10:35:00	435	7	60	1	0	60	0
C-2R (5N)	11	Experimental	Forz	2013-08-25	10:35:00	435	8	60	0	1	60	0
C-2R (5N)	11	Experimental	Forz	2013-08-25	10:35:00	435	9	60	1	0	60	0
C-2R (5N)	11	Experimental	Forz	2013-08-25	10:35:00	435	10	60	0	1	60	0
C-2R (5N)	11	Experimental	Forz	2013-08-25	10:35:00	435	11	60	1	0	60	0
C-2R (5N)	11	Experimental	Forz	2013-08-25	10:35:00	435	12	60	0	1	60	0
C-2R (5N)	11	Experimental	Forz	2013-08-25	10:35:00	435	13	60	1	0	60	0
C-2R (5N)	11	Experimental	Forz	2013-08-25	10:35:00	435	14	60	0	1	60	0
C-2R (5N)	11	Experimental	Forz	2013-08-25	10:35:00	435	15	60	1	0	60	0
C-2R (5N)	11	Experimental	Forz	2013-08-25	10:35:00	435	16	60	0	1	60	0
C-2R (5N)	11	Experimental	Forz	2013-08-25	10:35:00	435	17	60	1	0	60	0
C-2R (5N)	11	Experimental	Forz	2013-08-25	10:35:00	435	18	60	0	1	60	0
C-2R (5N)	11	Experimental	Forz	2013-08-25	10:35:00	435	19	60	1	0	60	0
C-2R (5N)	11	Experimental	Forz	2013-08-25	10:35:00	435	20	60	0	1	60	0
C-2R (5N)	11	Experimental	Ele1	2013-08-26	11:30:00	435	1	30	0	1	75	0
C-2R (5N)	11	Experimental	Ele1	2013-08-26	11:30:00	435	2	5	1	0	65	0
C-2R (5N)	11	Experimental	Ele1	2013-08-26	11:30:00	435	3	8	0	1	68	0
C-2R (5N)	11	Experimental	Ele1	2013-08-26	11:30:00	435	4	30	0	0	36	0
C-2R (5N)	11	Experimental	Ele1	2013-08-26	11:30:00	435	5	12	0	1	72	1
C-2R (5N)	11	Experimental	Ele1	2013-08-26	11:30:00	435	6	21	1	0	81	0
C-2R (5N)	11	Experimental	Ele1	2013-08-26	11:30:00	435	7	19	1	0	79	1
C-2R (5N)	11	Experimental	Ele1	2013-08-26	11:30:00	435	8	10	0	1	70	1
C-2R (5N)	11	Experimental	Ele1	2013-08-26	11:30:00	435	9	9	0	1	69	1
C-2R (5N)	11	Experimental	Ele1	2013-08-26	11:30:00	435	10	30	0	0	39	0
C-2R (5N)	11	Experimental	Ele1	2013-08-26	11:30:00	435	11	4	1	0	64	1
C-2R (5N)	11	Experimental	Ele1	2013-08-26	11:30:00	435	12	10	0	1	80	1
C-2R (5N)	11	Experimental	Ele1	2013-08-26	11:30:00	435	13	11	0	1	71	1
C-2R (5N)	11	Experimental	Ele1	2013-08-26	11:30:00	435	14	32	0	1	92	1
C-2R (5N)	11	Experimental	Ele1	2013-08-26	11:30:00	435	15	10	0	1	70	1
C-2R (5N)	11	Experimental	Ele1	2013-08-26	11:30:00	435	16	16	1	0	76	1
C-2R (5N)	11	Experimental	Ele1	2013-08-26	11:30:00	435	17	14	0	1	74	2
C-2R (5N)	11	Experimental	Ele1	2013-08-26	11:30:00	435	18	22	0	1	82	2
C-2R (5N)	11	Experimental	Ele1	2013-08-26	11:30:00	435	19	22	1	0	82	2
C-2R (5N)	11	Experimental	Ele1	2013-08-26	11:30:00	435	20	15	0	1	75	2
TOTAL	11	Experimental	Ele1	2013-08-26	11:30:00	435		16.5	6	12	71	18	6
C-2R (5N)	11	Experimental	Ele2	2013-08-30	10:20:00	435	1	2	0	1	62	0
C-2R (5N)	11	Experimental	Ele2	2013-08-30	10:20:00	435	2	30	1	0	90	0
C-2R (5N)	11	Experimental	Ele2	2013-08-30	10:20:00	435	3	2	0	1	62	0
C-2R (5N)	11	Experimental	Ele2	2013-08-30	10:20:00	435	4	30	0	0	40	0
C-2R (5N)	11	Experimental	Ele2	2013-08-30	10:20:00	435	5	10	0	1	74	1
C-2R (5N)	11	Experimental	Ele2	2013-08-30	10:20:00	435	6	30	0	1	90	0
C-2R (5N)	11	Experimental	Ele2	2013-08-30	10:20:00	435	7	6	0	1	66	1
C-2R (5N)	11	Experimental	Ele2	2013-08-30	10:20:00	435	8	30	0	0	40	0
C-2R (5N)	11	Experimental	Ele2	2013-08-30	10:20:00	435	9	20	1	0	80	0
C-2R (5N)	11	Experimental	Ele2	2013-08-30	10:20:00	435	10	30	0	1	90	0
C-2R (5N)	11	Experimental	Ele2	2013-08-30	10:20:00	435	11	22	0	1	73	1
C-2R (5N)	11	Experimental	Ele2	2013-08-30	10:20:00	435	12	40	1	0	78	1
C-2R (5N)	11	Experimental	Ele2	2013-08-30	10:20:00	435	13	10	0	1	72	2
C-2R (5N)	11	Experimental	Ele2	2013-08-30	10:20:00	435	14	30	0	0	40	0
C-2R (5N)	11	Experimental	Ele2	2013-08-30	10:20:00	435	15	30	0	0	40	0
C-2R (5N)	11	Experimental	Ele2	2013-08-30	10:20:00	435	16	40	0	1	100	1
C-2R (5N)	11	Experimental	Ele2	2013-08-30	10:20:00	435	17	30	0	0	30	0
C-2R (5N)	11	Experimental	Ele2	2013-08-30	10:20:00	435	18	30	0	0	30	0
C-2R (5N)	11	Experimental	Ele2	2013-08-30	10:20:00	435	19	30	0	1	90	1
C-2R (5N)	11	Experimental	Ele2	2013-08-30	10:20:00	435	20	30	0	0	40	0
TOTAL	11	Experimental	Ele2	2013-08-30	10:20:00	435		24.1	3	10	64.35	8	3
C-2R (5N)	11	Experimental	Ele3	2013-08-31	10:45:00	435	1	15	0	1	75	0
C-2R (5N)	11	Experimental	Ele3	2013-08-31	10:45:00	435	2	10	1	0	70	0
C-2R (5N)	11	Experimental	Ele3	2013-08-31	10:45:00	435	3	40	0	1	100	0
C-2R (5N)	11	Experimental	Ele3	2013-08-31	10:45:00	435	4	30	0	0	40	0
C-2R (5N)	11	Experimental	Ele3	2013-08-31	10:45:00	435	5	10	0	1	70	1
C-2R (5N)	11	Experimental	Ele3	2013-08-31	10:45:00	435	6	12	0	1	75	1
C-2R (5N)	11	Experimental	Ele3	2013-08-31	10:45:00	435	7	21	0	1	81	1
C-2R (5N)	11	Experimental	Ele3	2013-08-31	10:45:00	435	8	30	1	0	80	0
C-2R (5N)	11	Experimental	Ele3	2013-08-31	10:45:00	435	9	30	0	0	40	0
C-2R (5N)	11	Experimental	Ele3	2013-08-31	10:45:00	435	10	30	0	0	40	0
C-2R (5N)	11	Experimental	Ele3	2013-08-31	10:45:00	435	11	30	0	0	40	0
C-2R (5N)	11	Experimental	Ele3	2013-08-31	10:45:00	435	12	30	0	0	40	0
C-2R (5N)	11	Experimental	Ele3	2013-08-31	10:45:00	435	13	40	0	1	100	0
C-2R (5N)	11	Experimental	Ele3	2013-08-31	10:45:00	435	14	30	0	0	40	0
C-2R (5N)	11	Experimental	Ele3	2013-08-31	10:45:00	435	15	30	0	0	40	0
C-2R (5N)	11	Experimental	Ele3	2013-08-31	10:45:00	435	16	30	0	0	40	0
C-2R (5N)	11	Experimental	Ele3	2013-08-31	10:45:00	435	17	30	0	0	40	0
C-2R (5N)	11	Experimental	Ele3	2013-08-31	10:45:00	435	18	40	0	1	100	1
C-2R (5N)	11	Experimental	Ele3	2013-08-31	10:45:00	435	19	40	0	1	100	0
C-2R (5N)	11	Experimental	Ele3	2013-08-31	10:45:00	435	20	30	0	0	40	0
TOTAL	11	Experimental	Ele3	2013-08-31	10:45:00	435		27.9	2	8	62.55	4	2
C-2R (5N)	11	Experimental	Ele4	2013-09-02	14:40:00	435	1	5	0	1	65	0
C-2R (5N)	11	Experimental	Ele4	2013-09-02	14:40:00	435	2	20	1	0	80	0
C-2R (5N)	11	Experimental	Ele4	2013-09-02	14:40:00	435	3	16	0	1	76	1
C-2R (5N)	11	Experimental	Ele4	2013-09-02	14:40:00	435	4	30	0	1	90	1
C-2R (5N)	11	Experimental	Ele4	2013-09-02	14:40:00	435	5	30	0	0	40	0
C-2R (5N)	11	Experimental	Ele4	2013-09-02	14:40:00	435	6	30	0	0	40	0
C-2R (5N)	11	Experimental	Ele4	2013-09-02	14:40:00	435	7	20	0	1	80	1
C-2R (5N)	11	Experimental	Ele4	2013-09-02	14:40:00	435	8	30	0	0	40	0
C-2R (5N)	11	Experimental	Ele4	2013-09-02	14:40:00	435	9	30	0	1	90	1
C-2R (5N)	11	Experimental	Ele4	2013-09-02	14:40:00	435	10	30	0	0	40	0
C-2R (5N)	11	Experimental	Ele4	2013-09-02	14:40:00	435	11	30	0	0	40	0
C-2R (5N)	11	Experimental	Ele4	2013-09-02	14:40:00	435	12	30	0	0	40	0
C-2R (5N)	11	Experimental	Ele4	2013-09-02	14:40:00	435	13	30	0	0	40	0
C-2R (5N)	11	Experimental	Ele4	2013-09-02	14:40:00	435	14	23	0	1	90	1
C-2R (5N)	11	Experimental	Ele4	2013-09-02	14:40:00	435	15	16	0	1	60	1
C-2R (5N)	11	Experimental	Ele4	2013-09-02	14:40:00	435	16	20	0	1	80	1
C-2R (5N)	11	Experimental	Ele4	2013-09-02	14:40:00	435	17	30	0	0	40	0
C-2R (5N)	11	Experimental	Ele4	2013-09-02	14:40:00	435	18	30	0	0	40	0
C-2R (5N)	11	Experimental	Ele4	2013-09-02	14:40:00	435	19	30	0	0	40	0
C-2R (5N)	11	Experimental	Ele4	2013-09-02	14:40:00	435	20	30	0	0	40	0
TOTAL	11	Experimental	Ele4	2013-09-02	14:40:00	435		25.5	1	8	57.55	7	1
C-3N (9N)	12	Experimental	Hab1	2013-08-30	12:00:00	450	0	300	0	0	300	4
C-3N (9N)	12	Experimental	Hab2	2013-08-31	11:50:00	450	0	300	0	0	300	4
C-3N (9N)	12	Experimental	Hab3	2013-09-02	15:35:00	450	0	300	0	0	300	4
C-3N (9N)	12	Experimental	Forz	2013-09-03	10:00:00	450	1	15	0	1	75	0
C-3N (9N)	12	Experimental	Forz	2013-09-03	10:00:00	450	2	10	1	0	70	0
C-3N (9N)	12	Experimental	Forz	2013-09-03	10:00:00	450	3	30	0	1	90	0
C-3N (9N)	12	Experimental	Forz	2013-09-03	10:00:00	450	4	20	1	0	80	0
C-3N (9N)	12	Experimental	Forz	2013-09-03	10:00:00	450	5	5	0	1	65	0
C-3N (9N)	12	Experimental	Forz	2013-09-03	10:00:00	450	6	5	1	0	65	0
C-3N (9N)	12	Experimental	Forz	2013-09-03	10:00:00	450	7	10	0	1	70	0
C-3N (9N)	12	Experimental	Forz	2013-09-03	10:00:00	450	8	10	1	0	70	0
C-3N (9N)	12	Experimental	Forz	2013-09-03	10:00:00	450	9	30	0	1	90	0
C-3N (9N)	12	Experimental	Forz	2013-09-03	10:00:00	450	10	30	0	0	40	0
C-3N (9N)	12	Experimental	Forz	2013-09-03	10:00:00	450	11	20	0	1	80	0
C-3N (9N)	12	Experimental	Forz	2013-09-03	10:00:00	450	12	30	1	0	90	10
C-3N (9N)	12	Experimental	Forz	2013-09-03	10:00:00	450	13	15	0	1	90	1
C-3N (9N)	12	Experimental	Forz	2013-09-03	10:00:00	450	14	30	1	0	90	0
C-3N (9N)	12	Experimental	Forz	2013-09-03	10:00:00	450	15	30	0	1	90	0
C-3N (9N)	12	Experimental	Forz	2013-09-03	10:00:00	450	16	30	0	0	40	0
C-3N (9N)	12	Experimental	Forz	2013-09-03	10:00:00	450	17	20	0	1	90	0
C-3N (9N)	12	Experimental	Forz	2013-09-03	10:00:00	450	18	30	0	0	30	0
C-3N (9N)	12	Experimental	Forz	2013-09-03	10:00:00	450	19	30	0	1	90	1
C-3N (9N)	12	Experimental	Forz	2013-09-03	10:00:00	450	20	30	1	0	90	1
C-3N (9N)	12	Experimental	Ele1	2013-09-04	11:10:00	450	1	19	0	1	70	1
C-3N (9N)	12	Experimental	Ele1	2013-09-04	11:10:00	450	2	30	0	0	40	0
C-3N (9N)	12	Experimental	Ele1	2013-09-04	11:10:00	450	3	30	0	0	40	0
C-3N (9N)	12	Experimental	Ele1	2013-09-04	11:10:00	450	4	30	0	0	40	0
C-3N (9N)	12	Experimental	Ele1	2013-09-04	11:10:00	450	5	20	1	0	80	1
C-3N (9N)	12	Experimental	Ele1	2013-09-04	11:10:00	450	6	30	0	0	40	0
C-3N (9N)	12	Experimental	Ele1	2013-09-04	11:10:00	450	7	30	0	0	40	0
C-3N (9N)	12	Experimental	Ele1	2013-09-04	11:10:00	450	8	16	1	0	60	1
C-3N (9N)	12	Experimental	Ele1	2013-09-04	11:10:00	450	9	30	1	0	90	1
C-3N (9N)	12	Experimental	Ele1	2013-09-04	11:10:00	450	10	25	1	0	50	1
C-3N (9N)	12	Experimental	Ele1	2013-09-04	11:10:00	450	11	30	0	0	40	0
C-3N (9N)	12	Experimental	Ele1	2013-09-04	11:10:00	450	12	30	0	1	90	1
C-3N (9N)	12	Experimental	Ele1	2013-09-04	11:10:00	450	13	30	0	0	40	0
C-3N (9N)	12	Experimental	Ele1	2013-09-04	11:10:00	450	14	30	0	0	40	0
C-3N (9N)	12	Experimental	Ele1	2013-09-04	11:10:00	450	15	30	0	0	40	0
C-3N (9N)	12	Experimental	Ele1	2013-09-04	11:10:00	450	16	30	0	0	40	0
C-3N (9N)	12	Experimental	Ele1	2013-09-04	11:10:00	450	17	30	0	0	40	0
C-3N (9N)	12	Experimental	Ele1	2013-09-04	11:10:00	450	18	30	0	0	40	0
C-3N (9N)	12	Experimental	Ele1	2013-09-04	11:10:00	450	19	30	0	0	40	0
C-3N (9N)	12	Experimental	Ele1	2013-09-04	11:10:00	450	20	30	0	0	40	0
TOTAL	12	Experimental	Ele1	2013-09-04	11:10:00	450		28	4	2	50	6	2
C-3N (9N)	12	Experimental	Ele2	2013-09-05	10:35:00	450	1	15	1	0	45	1
C-3N (9N)	12	Experimental	Ele2	2013-09-05	10:35:00	450	2	24	0	1	42	1
C-3N (9N)	12	Experimental	Ele2	2013-09-05	10:35:00	450	3	30	0	0	30	0
C-3N (9N)	12	Experimental	Ele2	2013-09-05	10:35:00	450	4	19	1	0	60	1
C-3N (9N)	12	Experimental	Ele2	2013-09-05	10:35:00	450	5	30	0	1	60	1
C-3N (9N)	12	Experimental	Ele2	2013-09-05	10:35:00	450	6	30	0	0	30	0
C-3N (9N)	12	Experimental	Ele2	2013-09-05	10:35:00	450	7	30	0	1	34	1
C-3N (9N)	12	Experimental	Ele2	2013-09-05	10:35:00	450	8	30	0	0	40	0
C-3N (9N)	12	Experimental	Ele2	2013-09-05	10:35:00	450	9	30	0	0	40	0
C-3N (9N)	12	Experimental	Ele2	2013-09-05	10:35:00	450	10	30	0	0	40	0
C-3N (9N)	12	Experimental	Ele2	2013-09-05	10:35:00	450	11	5	1	0	40	1
C-3N (9N)	12	Experimental	Ele2	2013-09-05	10:35:00	450	12	12	1	0	40	1
C-3N (9N)	12	Experimental	Ele2	2013-09-05	10:35:00	450	13	30	0	0	40	0
C-3N (9N)	12	Experimental	Ele2	2013-09-05	10:35:00	450	14	19	0	1	40	1
C-3N (9N)	12	Experimental	Ele2	2013-09-05	10:35:00	450	15	30	0	0	40	0
C-3N (9N)	12	Experimental	Ele2	2013-09-05	10:35:00	450	16	30	0	0	40	0
C-3N (9N)	12	Experimental	Ele2	2013-09-05	10:35:00	450	17	30	0	0	40	0
C-3N (9N)	12	Experimental	Ele2	2013-09-05	10:35:00	450	18	30	0	0	40	0
C-3N (9N)	12	Experimental	Ele2	2013-09-05	10:35:00	450	19	30	0	1	30	0
C-3N (9N)	12	Experimental	Ele2	2013-09-05	10:35:00	450	20	30	0	0	40	0
TOTAL	12	Experimental	Ele2	2013-09-05	10:35:00	450		25.7	4	5	40.55	8	4
C-3N (9N)	12	Experimental	Ele3	2013-09-07	10:15:00	450	1	12	0	1	60	1
C-3N (9N)	12	Experimental	Ele3	2013-09-07	10:15:00	450	2	30	0	1	68	1
C-3N (9N)	12	Experimental	Ele3	2013-09-07	10:15:00	450	3	22	0	1	66	1
C-3N (9N)	12	Experimental	Ele3	2013-09-07	10:15:00	450	4	8	0	1	42	1
C-3N (9N)	12	Experimental	Ele3	2013-09-07	10:15:00	450	5	30	0	0	60	0
C-3N (9N)	12	Experimental	Ele3	2013-09-07	10:15:00	450	6	13	0	1	56	1
C-3N (9N)	12	Experimental	Ele3	2013-09-07	10:15:00	450	7	8	0	1	50	1
C-3N (9N)	12	Experimental	Ele3	2013-09-07	10:15:00	450	8	4	0	1	50	1
C-3N (9N)	12	Experimental	Ele3	2013-09-07	10:15:00	450	9	9	0	1	46	1
C-3N (9N)	12	Experimental	Ele3	2013-09-07	10:15:00	450	10	30	1	0	40	1
C-3N (9N)	12	Experimental	Ele3	2013-09-07	10:15:00	450	11	30	0	1	60	1
C-3N (9N)	12	Experimental	Ele3	2013-09-07	10:15:00	450	12	4	1	0	37	1
C-3N (9N)	12	Experimental	Ele3	2013-09-07	10:15:00	450	13	30	0	0	40	0
C-3N (9N)	12	Experimental	Ele3	2013-09-07	10:15:00	450	14	4	0	1	40	1
C-3N (9N)	12	Experimental	Ele3	2013-09-07	10:15:00	450	15	17	0	1	50	1
C-3N (9N)	12	Experimental	Ele3	2013-09-07	10:15:00	450	16	20	0	1	60	1
C-3N (9N)	12	Experimental	Ele3	2013-09-07	10:15:00	450	17	7	1	0	50	1
C-3N (9N)	12	Experimental	Ele3	2013-09-07	10:15:00	450	18	10	0	1	40	1
C-3N (9N)	12	Experimental	Ele3	2013-09-07	10:15:00	450	19	30	0	1	40	1
C-3N (9N)	12	Experimental	Ele3	2013-09-07	10:15:00	450	20	30	0	0	40	0
TOTAL	12	Experimental	Ele3	2013-09-07	10:15:00	450		17.4	3	14	49.75	17	3
C-3N (9N)	12	Experimental	Ele4	2013-09-09	09:30:00	450	1	10	1	0	60	1
C-3N (9N)	12	Experimental	Ele4	2013-09-09	09:30:00	450	2	12	0	1	49	1
C-3N (9N)	12	Experimental	Ele4	2013-09-09	09:30:00	450	3	11	0	1	84	1
C-3N (9N)	12	Experimental	Ele4	2013-09-09	09:30:00	450	4	2	1	0	46	1
C-3N (9N)	12	Experimental	Ele4	2013-09-09	09:30:00	450	5	7	0	1	63	1
C-3N (9N)	12	Experimental	Ele4	2013-09-09	09:30:00	450	6	30	0	0	40	0
C-3N (9N)	12	Experimental	Ele4	2013-09-09	09:30:00	450	7	30	0	0	40	0
C-3N (9N)	12	Experimental	Ele4	2013-09-09	09:30:00	450	8	7	0	1	39	0
C-3N (9N)	12	Experimental	Ele4	2013-09-09	09:30:00	450	9	30	0	1	30	0
C-3N (9N)	12	Experimental	Ele4	2013-09-09	09:30:00	450	10	4	0	1	53	1
C-3N (9N)	12	Experimental	Ele4	2013-09-09	09:30:00	450	11	30	0	0	50	0
C-3N (9N)	12	Experimental	Ele4	2013-09-09	09:30:00	450	12	7	1	0	40	1
C-3N (9N)	12	Experimental	Ele4	2013-09-09	09:30:00	450	13	30	0	0	49	0
C-3N (9N)	12	Experimental	Ele4	2013-09-09	09:30:00	450	14	30	0	0	40	0
C-3N (9N)	12	Experimental	Ele4	2013-09-09	09:30:00	450	15	30	0	0	40	0
C-3N (9N)	12	Experimental	Ele4	2013-09-09	09:30:00	450	16	30	0	0	40	0
C-3N (9N)	12	Experimental	Ele4	2013-09-09	09:30:00	450	17	30	0	0	40	0
C-3N (9N)	12	Experimental	Ele4	2013-09-09	09:30:00	450	18	28	1	0	65	1
C-3N (9N)	12	Experimental	Ele4	2013-09-09	09:30:00	450	19	50	0	1	77	1
C-3N (9N)	12	Experimental	Ele4	2013-09-09	09:30:00	450	20	20	0	1	65	1
TOTAL	12	Experimental	Ele4	2013-09-09	09:30:00	450		21.4	4	8	50.5	10	4
A-1N	1	Control	Hab1	2013-04-28	10:00:00	300	0	300	0	0	300	4
A-1N	1	Control	Hab2	2013-04-29	10:00:00	300	0	300	0	0	300	4
A-1N	1	Control	Forz	2013-04-30	17:00:00	300	1	30	1	0	30	0
A-1N	1	Control	Forz	2013-04-30	17:00:00	300	2	60	0	1	60	0
A-1N	1	Control	Forz	2013-04-30	17:00:00	300	3	30	1	0	30	0
A-1N	1	Control	Forz	2013-04-30	17:00:00	300	4	30	0	1	30	0
A-1N	1	Control	Forz	2013-04-30	17:00:00	300	5	30	0	0	30	0
A-1N	1	Control	Forz	2013-04-30	17:00:00	300	6	60	0	1	60	0
A-1N	1	Control	Forz	2013-04-30	17:00:00	300	7	240	1	0	240	0
A-1N	1	Control	Forz	2013-04-30	17:00:00	300	8	60	0	1	60	0
A-1N	1	Control	Forz	2013-04-30	17:00:00	300	9	60	1	0	39	0
A-1N	1	Control	Forz	2013-04-30	17:00:00	300	10	43	0	0	34	0
A-1N	1	Control	Forz	2013-04-30	17:00:00	300	11	12	1	0	12	2
A-1N	1	Control	Forz	2013-04-30	17:00:00	300	12	4	0	0	4	0
A-1N	1	Control	Forz	2013-04-30	17:00:00	300	13	35	0	0	35	0
A-1N	1	Control	Forz	2013-04-30	17:00:00	300	14	38	0	0	38	0
A-1N	1	Control	Forz	2013-04-30	17:00:00	300	15	15	1	0	75	0
A-1N	1	Control	Forz	2013-04-30	17:00:00	300	16	33	0	0	33	0
A-1N	1	Control	Forz	2013-04-30	17:00:00	300	17	36	0	0	36	0
A-1N	1	Control	Forz	2013-04-30	17:00:00	300	18	34	0	0	34	0
A-1N	1	Control	Forz	2013-04-30	17:00:00	300	19	33	0	0	33	0
A-1N	1	Control	Forz	2013-04-30	17:00:00	300	20	34	0	0	34	0
A-1N	1	Control	Ele1	2013-05-01	14:40:00	300	1	28	0	1	120	0
A-1N	1	Control	Ele1	2013-05-01	14:40:00	300	2	27	1	0	120	3
A-1N	1	Control	Ele1	2013-05-01	14:40:00	300	3	36	0	0	36	0
A-1N	1	Control	Ele1	2013-05-01	14:40:00	300	4	55	0	0	55	0
A-1N	1	Control	Ele1	2013-05-01	14:40:00	300	5	33	0	0	33	0
A-1N	1	Control	Ele1	2013-05-01	14:40:00	300	6	59	0	1	154	0
A-1N	1	Control	Ele1	2013-05-01	14:40:00	300	7	43	0	0	43	0
A-1N	1	Control	Ele1	2013-05-01	14:40:00	300	8	60	0	0	60	0
A-1N	1	Control	Ele1	2013-05-01	14:40:00	300	9	72	0	0	72	0
A-1N	1	Control	Ele1	2013-05-01	14:40:00	300	10	68	0	0	68	0
A-1N	1	Control	Ele1	2013-05-01	14:40:00	300	11	32	1	0	120	1
A-1N	1	Control	Ele1	2013-05-01	14:40:00	300	12	40	0	0	40	0
A-1N	1	Control	Ele1	2013-05-01	14:40:00	300	13	52	0	0	52	0
A-1N	1	Control	Ele1	2013-05-01	14:40:00	300	14	28	1	0	97	0
A-1N	1	Control	Ele1	2013-05-01	14:40:00	300	15	51	0	0	51	0
A-1N	1	Control	Ele1	2013-05-01	14:40:00	300	16	41	0	0	41	0
A-1N	1	Control	Ele1	2013-05-01	14:40:00	300	17	19	1	0	89	0
A-1N	1	Control	Ele1	2013-05-01	14:40:00	300	18	48	0	0	48	0
A-1N	1	Control	Ele1	2013-05-01	14:40:00	300	19	26	1	0	86	0
A-1N	1	Control	Ele1	2013-05-01	14:40:00	300	20	35	1	0	122	4
TOTAL	1	Control	Ele1	2013-05-01	14:40:00	300		42.65	6	2	75.35	8	2
A-1N	1	Control	Ele2	2013-05-02	14:40:00	300	1	41	0	0	41	0
A-1N	1	Control	Ele2	2013-05-02	14:40:00	300	2	46	0	0	46	0
A-1N	1	Control	Ele2	2013-05-02	14:40:00	300	3	15	1	0	69	3
A-1N	1	Control	Ele2	2013-05-02	14:40:00	300	4	31	1	0	74	0
A-1N	1	Control	Ele2	2013-05-02	14:40:00	300	5	28	1	0	55	3
A-1N	1	Control	Ele2	2013-05-02	14:40:00	300	6	20	1	0	65	2
A-1N	1	Control	Ele2	2013-05-02	14:40:00	300	7	30	0	0	30	0
A-1N	1	Control	Ele2	2013-05-02	14:40:00	300	8	14	0	1	60	3
A-1N	1	Control	Ele2	2013-05-02	14:40:00	300	9	28	0	1	114	2
A-1N	1	Control	Ele2	2013-05-02	14:40:00	300	10	30	0	0	30	0
A-1N	1	Control	Ele2	2013-05-02	14:40:00	300	11	22	1	0	87	2
A-1N	1	Control	Ele2	2013-05-02	14:40:00	300	12	37	0	0	37	0
A-1N	1	Control	Ele2	2013-05-02	14:40:00	300	13	15	1	0	43	0
A-1N	1	Control	Ele2	2013-05-02	14:40:00	300	14	35	0	0	35	0
A-1N	1	Control	Ele2	2013-05-02	14:40:00	300	15	34	0	0	34	0
A-1N	1	Control	Ele2	2013-05-02	14:40:00	300	16	35	0	0	35	0
A-1N	1	Control	Ele2	2013-05-02	14:40:00	300	17	36	0	0	36	0
A-1N	1	Control	Ele2	2013-05-02	14:40:00	300	18	30	0	0	30	0
A-1N	1	Control	Ele2	2013-05-02	14:40:00	300	19	30	0	0	30	0
A-1N	1	Control	Ele2	2013-05-02	14:40:00	300	20	30	0	0	30	0
TOTAL	1	Control	Ele2	2013-05-02	14:40:00	300		29.35	6	2	49.05	15	2
A-1N	1	Control	Ele3	2013-05-03	14:40:00	285	1	32	0	0	32	0
A-1N	1	Control	Ele3	2013-05-03	14:40:00	285	2	52	0	0	52	0
A-1N	1	Control	Ele3	2013-05-03	14:40:00	285	3	30	0	0	30	0
A-1N	1	Control	Ele3	2013-05-03	14:40:00	285	4	42	0	0	42	0
A-1N	1	Control	Ele3	2013-05-03	14:40:00	285	5	50	0	0	50	0
A-1N	1	Control	Ele3	2013-05-03	14:40:00	285	6	35	0	0	35	0
A-1N	1	Control	Ele3	2013-05-03	14:40:00	285	7	49	0	0	49	0
A-1N	1	Control	Ele3	2013-05-03	14:40:00	285	8	60	0	0	60	0
A-1N	1	Control	Ele3	2013-05-03	14:40:00	285	9	35	0	0	35	0
A-1N	1	Control	Ele3	2013-05-03	14:40:00	285	10	38	0	0	38	0
A-1N	1	Control	Ele3	2013-05-03	14:40:00	285	11	61	0	0	61	0
A-1N	1	Control	Ele3	2013-05-03	14:40:00	285	12	48	0	0	48	0
A-1N	1	Control	Ele3	2013-05-03	14:40:00	285	13	42	0	0	42	0
A-1N	1	Control	Ele3	2013-05-03	14:40:00	285	14	47	0	0	47	0
A-1N	1	Control	Ele3	2013-05-03	14:40:00	285	15	48	0	0	48	0
A-1N	1	Control	Ele3	2013-05-03	14:40:00	285	16	79	0	0	79	0
A-1N	1	Control	Ele3	2013-05-03	14:40:00	285	17	38	0	0	38	0
A-1N	1	Control	Ele3	2013-05-03	14:40:00	285	18	52	0	0	52	0
A-1N	1	Control	Ele3	2013-05-03	14:40:00	285	19	47	0	0	47	0
A-1N	1	Control	Ele3	2013-05-03	14:40:00	285	20	30	0	0	30	0
TOTAL	1	Control	Ele3	2013-05-03	14:40:00	285		45.75	0	0	45.75	0	0
A-1N	1	Control	Ele4	2014-05-04	16:20:00	285	1	39	0	0	39	0
A-1N	1	Control	Ele4	2014-05-04	16:20:00	285	2	43	0	0	43	0
A-1N	1	Control	Ele4	2014-05-04	16:20:00	285	3	52	0	0	52	0
A-1N	1	Control	Ele4	2014-05-04	16:20:00	285	4	30	0	1	120	4
A-1N	1	Control	Ele4	2014-05-04	16:20:00	285	5	42	0	0	42	0
A-1N	1	Control	Ele4	2014-05-04	16:20:00	285	6	60	0	0	60	0
A-1N	1	Control	Ele4	2014-05-04	16:20:00	285	7	16	1	0	64	4
A-1N	1	Control	Ele4	2014-05-04	16:20:00	285	8	51	0	0	51	0
A-1N	1	Control	Ele4	2014-05-04	16:20:00	285	9	43	0	0	43	0
A-1N	1	Control	Ele4	2014-05-04	16:20:00	285	10	40	1	0	82	4
A-1N	1	Control	Ele4	2014-05-04	16:20:00	285	11	57	0	0	57	0
A-1N	1	Control	Ele4	2014-05-04	16:20:00	285	12	72	0	0	72	0
A-1N	1	Control	Ele4	2014-05-04	16:20:00	285	13	48	0	0	48	0
A-1N	1	Control	Ele4	2014-05-04	16:20:00	285	14	45	0	0	45	0
A-1N	1	Control	Ele4	2014-05-04	16:20:00	285	15	65	0	0	65	0
A-1N	1	Control	Ele4	2014-05-04	16:20:00	285	16	43	0	0	43	0
A-1N	1	Control	Ele4	2014-05-04	16:20:00	285	17	43	0	0	43	0
A-1N	1	Control	Ele4	2014-05-04	16:20:00	285	18	45	0	0	45	0
A-1N	1	Control	Ele4	2014-05-04	16:20:00	285	19	30	0	0	30	0
A-1N	1	Control	Ele4	2014-05-04	16:20:00	285	20	40	0	0	40	0
TOTAL	1	Control	Ele4	2014-05-04	16:20:00	285		45.2	2	1	54.2	12	1
A-3N	2	Control	Hab1	2013-04-28	09:20:00	375	0	300	0	0	300	4
A-3N	2	Control	Hab2	2013-04-29	09:20:00	375	0	300	0	0	300	4
A-3N	2	Control	Forz	2013-05-01	11:45:00	375	1	30	0	1	70	0
A-3N	2	Control	Forz	2013-05-01	11:45:00	375	2	36	1	0	94	0
A-3N	2	Control	Forz	2013-05-01	11:45:00	375	3	39	0	0	39	0
A-3N	2	Control	Forz	2013-05-01	11:45:00	375	4	36	0	0	36	0
A-3N	2	Control	Forz	2013-05-01	11:45:00	375	5	44	0	0	44	0
A-3N	2	Control	Forz	2013-05-01	11:45:00	375	6	7	1	0	112	0
A-3N	2	Control	Forz	2013-05-01	11:45:00	375	7	52	0	0	52	0
A-3N	2	Control	Forz	2013-05-01	11:45:00	375	8	62	0	0	62	0
A-3N	2	Control	Forz	2013-05-01	11:45:00	375	9	49	0	0	49	0
A-3N	2	Control	Forz	2013-05-01	11:45:00	375	10	76	0	0	76	0
A-3N	2	Control	Forz	2013-05-01	11:45:00	375	11	50	0	0	50	0
A-3N	2	Control	Forz	2013-05-01	11:45:00	375	12	143	0	0	143	0
A-3N	2	Control	Forz	2013-05-01	11:45:00	375	13	69	0	0	69	0
A-3N	2	Control	Forz	2013-05-01	11:45:00	375	14	129	1	0	129	0
A-3N	2	Control	Forz	2013-05-01	11:45:00	375	15	180	0	1	180	0
A-3N	2	Control	Forz	2013-05-01	11:45:00	375	16	48	0	0	48	0
A-3N	2	Control	Forz	2013-05-01	11:45:00	375	17	120	0	0	120	0
A-3N	2	Control	Forz	2013-05-01	11:45:00	375	18	65	0	0	65	0
A-3N	2	Control	Forz	2013-05-01	11:45:00	375	19	111	0	1	111	0
A-3N	2	Control	Forz	2013-05-01	11:45:00	375	20	30	0	0	30	0
A-3N	2	Control	Ele1	2013-05-02	10:30:00	375	1	30	1	0	120	0
A-3N	2	Control	Ele1	2013-05-02	10:30:00	375	2	21	0	1	90	0
A-3N	2	Control	Ele1	2013-05-02	10:30:00	375	3	38	0	0	38	0
A-3N	2	Control	Ele1	2013-05-02	10:30:00	375	4	69	0	0	69	0
A-3N	2	Control	Ele1	2013-05-02	10:30:00	375	5	62	0	0	62	0
A-3N	2	Control	Ele1	2013-05-02	10:30:00	375	6	72	0	0	72	0
A-3N	2	Control	Ele1	2013-05-02	10:30:00	375	7	60	0	0	60	0
A-3N	2	Control	Ele1	2013-05-02	10:30:00	375	8	64	0	0	64	0
A-3N	2	Control	Ele1	2013-05-02	10:30:00	375	9	41	0	0	41	0
A-3N	2	Control	Ele1	2013-05-02	10:30:00	375	10	61	0	0	61	0
A-3N	2	Control	Ele1	2013-05-02	10:30:00	375	11	103	0	0	103	0
A-3N	2	Control	Ele1	2013-05-02	10:30:00	375	12	57	0	0	57	0
A-3N	2	Control	Ele1	2013-05-02	10:30:00	375	13	73	0	0	73	0
A-3N	2	Control	Ele1	2013-05-02	10:30:00	375	14	63	0	0	63	0
A-3N	2	Control	Ele1	2013-05-02	10:30:00	375	15	60	0	0	60	0
A-3N	2	Control	Ele1	2013-05-02	10:30:00	375	16	40	0	0	40	0
A-3N	2	Control	Ele1	2013-05-02	10:30:00	375	17	53	0	0	53	0
A-3N	2	Control	Ele1	2013-05-02	10:30:00	375	18	39	0	0	39	0
A-3N	2	Control	Ele1	2013-05-02	10:30:00	375	19	83	0	0	83	0
A-3N	2	Control	Ele1	2013-05-02	10:30:00	375	20	59	0	0	59	0
TOTAL	2	Control	Ele1	2013-05-02	10:30:00	375		57.4	1	1	65.35	0	1
A-3N	2	Control	Ele2	2013-05-03	09:00:00	375	1	30	0	0	30	0
A-3N	2	Control	Ele2	2013-05-03	09:00:00	375	2	52	0	0	52	0
A-3N	2	Control	Ele2	2013-05-03	09:00:00	375	3	40	0	1	110	0
A-3N	2	Control	Ele2	2013-05-03	09:00:00	375	4	46	0	0	46	2
A-3N	2	Control	Ele2	2013-05-03	09:00:00	375	5	37	0	0	37	0
A-3N	2	Control	Ele2	2013-05-03	09:00:00	375	6	30	0	1	140	0
A-3N	2	Control	Ele2	2013-05-03	09:00:00	375	7	30	1	0	30	0
A-3N	2	Control	Ele2	2013-05-03	09:00:00	375	8	15	0	1	140	0
A-3N	2	Control	Ele2	2013-05-03	09:00:00	375	9	65	0	0	65	0
A-3N	2	Control	Ele2	2013-05-03	09:00:00	375	10	30	0	0	30	0
A-3N	2	Control	Ele2	2013-05-03	09:00:00	375	11	30	0	0	30	0
A-3N	2	Control	Ele2	2013-05-03	09:00:00	375	12	30	0	0	30	0
A-3N	2	Control	Ele2	2013-05-03	09:00:00	375	13	35	0	0	35	0
A-3N	2	Control	Ele2	2013-05-03	09:00:00	375	14	30	0	0	30	0
A-3N	2	Control	Ele2	2013-05-03	09:00:00	375	15	30	0	0	30	0
A-3N	2	Control	Ele2	2013-05-03	09:00:00	375	16	30	0	0	30	0
A-3N	2	Control	Ele2	2013-05-03	09:00:00	375	17	30	0	0	30	0
A-3N	2	Control	Ele2	2013-05-03	09:00:00	375	18	32	0	0	32	0
A-3N	2	Control	Ele2	2013-05-03	09:00:00	375	19	38	0	0	38	0
A-3N	2	Control	Ele2	2013-05-03	09:00:00	375	20	60	0	0	60	0
TOTAL	2	Control	Ele2	2013-05-03	09:00:00	375		36	1	3	51.25	2	1
A-3N	2	Control	Ele3	2013-05-04	09:20:00	375	1	30	0	0	30	0
A-3N	2	Control	Ele3	2013-05-04	09:20:00	375	2	3	0	1	70	2
A-3N	2	Control	Ele3	2013-05-04	09:20:00	375	3	23	1	0	80	1
A-3N	2	Control	Ele3	2013-05-04	09:20:00	375	4	10	0	1	70	1
A-3N	2	Control	Ele3	2013-05-04	09:20:00	375	5	30	0	0	30	0
A-3N	2	Control	Ele3	2013-05-04	09:20:00	375	6	58	0	0	58	0
A-3N	2	Control	Ele3	2013-05-04	09:20:00	375	7	22	0	1	82	0
A-3N	2	Control	Ele3	2013-05-04	09:20:00	375	8	13	0	1	128	1
A-3N	2	Control	Ele3	2013-05-04	09:20:00	375	9	30	0	0	30	0
A-3N	2	Control	Ele3	2013-05-04	09:20:00	375	10	30	0	0	30	0
A-3N	2	Control	Ele3	2013-05-04	09:20:00	375	11	39	0	1	120	0
A-3N	2	Control	Ele3	2013-05-04	09:20:00	375	12	7	0	1	102	0
A-3N	2	Control	Ele3	2013-05-04	09:20:00	375	13	38	0	0	38	0
A-3N	2	Control	Ele3	2013-05-04	09:20:00	375	14	30	0	1	80	1
A-3N	2	Control	Ele3	2013-05-04	09:20:00	375	15	29	1	0	100	1
A-3N	2	Control	Ele3	2013-05-04	09:20:00	375	16	21	0	1	80	0
A-3N	2	Control	Ele3	2013-05-04	09:20:00	375	17	31	0	0	31	0
A-3N	2	Control	Ele3	2013-05-04	09:20:00	375	18	30	1	0	120	0
A-3N	2	Control	Ele3	2013-05-04	09:20:00	375	19	40	0	0	40	0
A-3N	2	Control	Ele3	2013-05-04	09:20:00	375	20	7	0	1	71	0
TOTAL	2	Control	Ele3	2013-05-04	09:20:00	375		26.05	3	9	69.5	7	3
A-3N	2	Control	Ele4	2013-05-06	18:10:00	375	1	13	0	1	100	0
A-3N	2	Control	Ele4	2013-05-06	18:10:00	375	2	7	1	0	65	1
A-3N	2	Control	Ele4	2013-05-06	18:10:00	375	3	10	0	1	70	3
A-3N	2	Control	Ele4	2013-05-06	18:10:00	375	4	8	0	1	52	4
A-3N	2	Control	Ele4	2013-05-06	18:10:00	375	5	30	0	1	66	3
A-3N	2	Control	Ele4	2013-05-06	18:10:00	375	6	13	1	0	44	1
A-3N	2	Control	Ele4	2013-05-06	18:10:00	375	7	34	0	0	34	0
A-3N	2	Control	Ele4	2013-05-06	18:10:00	375	8	13	0	1	94	2
A-3N	2	Control	Ele4	2013-05-06	18:10:00	375	9	27	0	1	81	2
A-3N	2	Control	Ele4	2013-05-06	18:10:00	375	10	10	0	1	70	1
A-3N	2	Control	Ele4	2013-05-06	18:10:00	375	11	11	1	0	71	1
A-3N	2	Control	Ele4	2013-05-06	18:10:00	375	12	6	0	1	69	1
A-3N	2	Control	Ele4	2013-05-06	18:10:00	375	13	6	0	1	85	1
A-3N	2	Control	Ele4	2013-05-06	18:10:00	375	14	10	0	1	70	1
A-3N	2	Control	Ele4	2013-05-06	18:10:00	375	15	10	1	0	70	1
A-3N	2	Control	Ele4	2013-05-06	18:10:00	375	16	10	0	1	70	1
A-3N	2	Control	Ele4	2013-05-06	18:10:00	375	17	42	0	0	42	0
A-3N	2	Control	Ele4	2013-05-06	18:10:00	375	18	40	0	0	40	0
A-3N	2	Control	Ele4	2013-05-06	18:10:00	375	19	5	0	1	75	0
A-3N	2	Control	Ele4	2013-05-06	18:10:00	375	20	43	0	0	43	0
TOTAL	2	Control	Ele4	2013-05-06	18:10:00	375		17.4	4	12	65.55	23	4
B-1V	3	Control	Hab1	2013-04-28	09:25:00	450	0	300	0	0	300	4
B-1V	3	Control	Hab2	2013-04-29	09:25:00	450	0	300	0	0	300	4
B-1V	3	Control	Forz	2013-05-01	14:00:00	450	1	5	1	0	60	0
B-1V	3	Control	Forz	2013-05-01	14:00:00	450	2	9	0	1	79	2
B-1V	3	Control	Forz	2013-05-01	14:00:00	450	3	19	0	1	133	0
B-1V	3	Control	Forz	2013-05-01	14:00:00	450	4	11	1	0	120	4
B-1V	3	Control	Forz	2013-05-01	14:00:00	450	5	37	0	0	37	0
B-1V	3	Control	Forz	2013-05-01	14:00:00	450	6	20	1	0	120	0
B-1V	3	Control	Forz	2013-05-01	14:00:00	450	7	44	0	0	44	0
B-1V	3	Control	Forz	2013-05-01	14:00:00	450	8	29	1	0	120	0
B-1V	3	Control	Forz	2013-05-01	14:00:00	450	9	16	0	1	76	4
B-1V	3	Control	Forz	2013-05-01	14:00:00	450	10	19	1	0	88	4
B-1V	3	Control	Forz	2013-05-01	14:00:00	450	11	26	0	1	131	1
B-1V	3	Control	Forz	2013-05-01	14:00:00	450	12	32	0	0	32	0
B-1V	3	Control	Forz	2013-05-01	14:00:00	450	13	23	0	1	205	3
B-1V	3	Control	Forz	2013-05-01	14:00:00	450	14	30	1	0	105	0
B-1V	3	Control	Forz	2013-05-01	14:00:00	450	15	30	0	0	30	0
B-1V	3	Control	Forz	2013-05-01	14:00:00	450	16	37	0	0	37	0
B-1V	3	Control	Forz	2013-05-01	14:00:00	450	17	85	0	0	85	0
B-1V	3	Control	Forz	2013-05-01	14:00:00	450	18	32	0	0	32	0
B-1V	3	Control	Forz	2013-05-01	14:00:00	450	19	32	0	0	32	0
B-1V	3	Control	Forz	2013-05-01	14:00:00	450	20	51	0	0	51	0
B-1V	3	Control	Ele1	2013-05-02	13:10:00	450	1	35	0	0	35	0
B-1V	3	Control	Ele1	2013-05-02	13:10:00	450	2	36	0	0	36	0
B-1V	3	Control	Ele1	2013-05-02	13:10:00	450	3	34	0	0	34	0
B-1V	3	Control	Ele1	2013-05-02	13:10:00	450	4	49	0	0	49	0
B-1V	3	Control	Ele1	2013-05-02	13:10:00	450	5	34	0	0	34	0
B-1V	3	Control	Ele1	2013-05-02	13:10:00	450	6	100	0	0	100	1
B-1V	3	Control	Ele1	2013-05-02	13:10:00	450	7	63	0	0	63	0
B-1V	3	Control	Ele1	2013-05-02	13:10:00	450	8	43	0	0	43	0
B-1V	3	Control	Ele1	2013-05-02	13:10:00	450	9	48	0	0	48	0
B-1V	3	Control	Ele1	2013-05-02	13:10:00	450	10	30	0	1	84	2
B-1V	3	Control	Ele1	2013-05-02	13:10:00	450	11	41	0	0	41	0
B-1V	3	Control	Ele1	2013-05-02	13:10:00	450	12	83	0	0	83	0
B-1V	3	Control	Ele1	2013-05-02	13:10:00	450	13	30	1	0	120	1
B-1V	3	Control	Ele1	2013-05-02	13:10:00	450	14	97	0	0	97	0
B-1V	3	Control	Ele1	2013-05-02	13:10:00	450	15	78	0	0	78	0
B-1V	3	Control	Ele1	2013-05-02	13:10:00	450	16	66	0	0	66	0
B-1V	3	Control	Ele1	2013-05-02	13:10:00	450	17	51	0	0	51	0
B-1V	3	Control	Ele1	2013-05-02	13:10:00	450	18	37	0	0	37	0
B-1V	3	Control	Ele1	2013-05-02	13:10:00	450	19	41	0	0	41	0
B-1V	3	Control	Ele1	2013-05-02	13:10:00	450	20	90	0	0	90	0
TOTAL	3	Control	Ele1	2013-05-02	13:10:00	450		54.3	1	1	61.5	4	1
B-1V	3	Control	Ele2	2013-05-03	12:00:00	450	1	27	0	0	27	0
B-1V	3	Control	Ele2	2013-05-03	12:00:00	450	2	36	0	0	36	0
B-1V	3	Control	Ele2	2013-05-03	12:00:00	450	3	33	0	0	33	1
B-1V	3	Control	Ele2	2013-05-03	12:00:00	450	4	30	0	0	30	0
B-1V	3	Control	Ele2	2013-05-03	12:00:00	450	5	30	0	0	30	0
B-1V	3	Control	Ele2	2013-05-03	12:00:00	450	6	30	0	0	30	0
B-1V	3	Control	Ele2	2013-05-03	12:00:00	450	7	7	0	1	45	2
B-1V	3	Control	Ele2	2013-05-03	12:00:00	450	8	30	0	0	30	0
B-1V	3	Control	Ele2	2013-05-03	12:00:00	450	9	32	0	0	32	0
B-1V	3	Control	Ele2	2013-05-03	12:00:00	450	10	30	0	0	30	0
B-1V	3	Control	Ele2	2013-05-03	12:00:00	450	11	30	0	0	30	0
B-1V	3	Control	Ele2	2013-05-03	12:00:00	450	12	31	0	0	31	0
B-1V	3	Control	Ele2	2013-05-03	12:00:00	450	13	31	0	0	31	0
B-1V	3	Control	Ele2	2013-05-03	12:00:00	450	14	31	0	0	31	0
B-1V	3	Control	Ele2	2013-05-03	12:00:00	450	15	32	0	0	32	0
B-1V	3	Control	Ele2	2013-05-03	12:00:00	450	16	30	0	0	30	0
B-1V	3	Control	Ele2	2013-05-03	12:00:00	450	17	35	0	0	35	0
B-1V	3	Control	Ele2	2013-05-03	12:00:00	450	18	34	0	0	34	0
B-1V	3	Control	Ele2	2013-05-03	12:00:00	450	19	31	0	0	31	0
B-1V	3	Control	Ele2	2013-05-03	12:00:00	450	20	30	0	0	30	0
TOTAL	3	Control	Ele2	2013-05-03	12:00:00	450		30	0	1	31.9	3	0
B-1V	3	Control	Ele3	2013-05-04	10:00:00	450	1	38	0	0	38	0
B-1V	3	Control	Ele3	2013-05-04	10:00:00	450	2	30	0	1	120	4
B-1V	3	Control	Ele3	2013-05-04	10:00:00	450	3	40	0	0	40	0
B-1V	3	Control	Ele3	2013-05-04	10:00:00	450	4	49	0	0	49	0
B-1V	3	Control	Ele3	2013-05-04	10:00:00	450	5	16	1	0	67	3
B-1V	3	Control	Ele3	2013-05-04	10:00:00	450	6	50	0	1	120	4
B-1V	3	Control	Ele3	2013-05-04	10:00:00	450	7	39	0	0	39	0
B-1V	3	Control	Ele3	2013-05-04	10:00:00	450	8	50	0	0	50	0
B-1V	3	Control	Ele3	2013-05-04	10:00:00	450	9	74	0	0	74	0
B-1V	3	Control	Ele3	2013-05-04	10:00:00	450	10	34	0	0	34	0
B-1V	3	Control	Ele3	2013-05-04	10:00:00	450	11	47	0	0	47	0
B-1V	3	Control	Ele3	2013-05-04	10:00:00	450	12	30	0	0	30	0
B-1V	3	Control	Ele3	2013-05-04	10:00:00	450	13	30	0	0	30	0
B-1V	3	Control	Ele3	2013-05-04	10:00:00	450	14	37	0	0	37	0
B-1V	3	Control	Ele3	2013-05-04	10:00:00	450	15	30	1	0	101	4
B-1V	3	Control	Ele3	2013-05-04	10:00:00	450	16	30	0	1	77	4
B-1V	3	Control	Ele3	2013-05-04	10:00:00	450	17	30	0	0	30	0
B-1V	3	Control	Ele3	2013-05-04	10:00:00	450	18	52	0	0	52	0
B-1V	3	Control	Ele3	2013-05-04	10:00:00	450	19	37	0	0	37	0
B-1V	3	Control	Ele3	2013-05-04	10:00:00	450	20	30	1	0	72	4
TOTAL	3	Control	Ele3	2013-05-04	10:00:00	450		38.65	3	3	57.2	23	3
B-1V	3	Control	Ele4	2013-05-06	17:30:00	450	1	5	1	0	47	4
B-1V	3	Control	Ele4	2013-05-06	17:30:00	450	2	7	1	0	61	4
B-1V	3	Control	Ele4	2013-05-06	17:30:00	450	3	5	0	1	78	4
B-1V	3	Control	Ele4	2013-05-06	17:30:00	450	4	7	1	0	57	4
B-1V	3	Control	Ele4	2013-05-06	17:30:00	450	5	47	0	0	47	0
B-1V	3	Control	Ele4	2013-05-06	17:30:00	450	6	45	0	1	120	4
B-1V	3	Control	Ele4	2013-05-06	17:30:00	450	7	40	0	0	40	0
B-1V	3	Control	Ele4	2013-05-06	17:30:00	450	8	7	0	1	64	4
B-1V	3	Control	Ele4	2013-05-06	17:30:00	450	9	9	1	0	42	4
B-1V	3	Control	Ele4	2013-05-06	17:30:00	450	10	9	0	1	56	4
B-1V	3	Control	Ele4	2013-05-06	17:30:00	450	11	13	0	1	64	4
B-1V	3	Control	Ele4	2013-05-06	17:30:00	450	12	15	1	0	48	4
B-1V	3	Control	Ele4	2013-05-06	17:30:00	450	13	12	0	1	61	4
B-1V	3	Control	Ele4	2013-05-06	17:30:00	450	14	6	0	1	43	4
B-1V	3	Control	Ele4	2013-05-06	17:30:00	450	15	5	1	0	43	4
B-1V	3	Control	Ele4	2013-05-06	17:30:00	450	16	12	1	0	61	4
B-1V	3	Control	Ele4	2013-05-06	17:30:00	450	17	55	0	0	55	0
B-1V	3	Control	Ele4	2013-05-06	17:30:00	450	18	31	0	1	75	4
B-1V	3	Control	Ele4	2013-05-06	17:30:00	450	19	25	1	0	95	4
B-1V	3	Control	Ele4	2013-05-06	17:30:00	450	20	60	0	0	60	0
TOTAL	3	Control	Ele4	2013-05-06	17:30:00	450		20.75	8	8	60.85	64	6
B-0	4	Control	Hab1	2013-04-30	13:45:00	400	0	300	0	0	300	4
B-0	4	Control	Hab2	2013-05-01	13:45:00	400	0	300	0	0	300	4
B-0	4	Control	Forz	2013-05-02	13:45:00	400	1	30	1	0	30	0
B-0	4	Control	Forz	2013-05-02	13:45:00	400	2	16	0	1	82	0
B-0	4	Control	Forz	2013-05-02	13:45:00	400	3	36	0	0	36	0
B-0	4	Control	Forz	2013-05-02	13:45:00	400	4	52	0	0	52	0
B-0	4	Control	Forz	2013-05-02	13:45:00	400	5	41	0	0	41	0
B-0	4	Control	Forz	2013-05-02	13:45:00	400	6	30	0	1	120	5
B-0	4	Control	Forz	2013-05-02	13:45:00	400	7	30	1	0	120	5
B-0	4	Control	Forz	2013-05-02	13:45:00	400	8	24	0	1	61	3
B-0	4	Control	Forz	2013-05-02	13:45:00	400	9	72	0	0	72	0
B-0	4	Control	Forz	2013-05-02	13:45:00	400	10	17	0	1	17	0
B-0	4	Control	Forz	2013-05-02	13:45:00	400	11	37	0	0	37	0
B-0	4	Control	Forz	2013-05-02	13:45:00	400	12	36	0	0	36	0
B-0	4	Control	Forz	2013-05-02	13:45:00	400	13	49	0	0	49	0
B-0	4	Control	Forz	2013-05-02	13:45:00	400	14	49	0	0	49	0
B-0	4	Control	Forz	2013-05-02	13:45:00	400	15	45	0	0	45	0
B-0	4	Control	Forz	2013-05-02	13:45:00	400	16	36	0	0	36	0
B-0	4	Control	Forz	2013-05-02	13:45:00	400	17	30	0	0	30	0
B-0	4	Control	Forz	2013-05-02	13:45:00	400	18	34	0	0	34	0
B-0	4	Control	Forz	2013-05-02	13:45:00	400	19	30	0	0	30	0
B-0	4	Control	Forz	2013-05-02	13:45:00	400	20	42	0	0	42	0
B-0	4	Control	Ele1	2013-05-03	12:10:00	400	1	2	1	0	73	4
B-0	4	Control	Ele1	2013-05-03	12:10:00	400	2	8	0	1	77	4
B-0	4	Control	Ele1	2013-05-03	12:10:00	400	3	17	0	1	41	2
B-0	4	Control	Ele1	2013-05-03	12:10:00	400	4	30	0	0	30	0
B-0	4	Control	Ele1	2013-05-03	12:10:00	400	5	30	0	0	30	0
B-0	4	Control	Ele1	2013-05-03	12:10:00	400	6	30	0	0	30	0
B-0	4	Control	Ele1	2013-05-03	12:10:00	400	7	30	0	0	30	0
B-0	4	Control	Ele1	2013-05-03	12:10:00	400	8	30	0	0	30	0
B-0	4	Control	Ele1	2013-05-03	12:10:00	400	9	30	0	0	30	0
B-0	4	Control	Ele1	2013-05-03	12:10:00	400	10	48	0	0	48	0
B-0	4	Control	Ele1	2013-05-03	12:10:00	400	11	30	0	0	30	0
B-0	4	Control	Ele1	2013-05-03	12:10:00	400	12	30	0	0	30	0
B-0	4	Control	Ele1	2013-05-03	12:10:00	400	13	47	0	0	47	0
B-0	4	Control	Ele1	2013-05-03	12:10:00	400	14	30	0	0	30	0
B-0	4	Control	Ele1	2013-05-03	12:10:00	400	15	30	0	0	30	0
B-0	4	Control	Ele1	2013-05-03	12:10:00	400	16	38	0	0	38	0
B-0	4	Control	Ele1	2013-05-03	12:10:00	400	17	39	0	0	39	0
B-0	4	Control	Ele1	2013-05-03	12:10:00	400	18	30	0	0	30	0
B-0	4	Control	Ele1	2013-05-03	12:10:00	400	19	30	0	0	30	0
B-0	4	Control	Ele1	2013-05-03	12:10:00	400	20	30	0	0	120	4
TOTAL	4	Control	Ele1	2013-05-03	12:10:00	400		29.45	1	2	42.15	14	1
B-0	4	Control	Ele2	2013-05-04	12:10:00	400	1	10	0	1	85	4
B-0	4	Control	Ele2	2013-05-04	12:10:00	400	2	9	1	0	120	3
B-0	4	Control	Ele2	2013-05-04	12:10:00	400	3	30	0	0	30	0
B-0	4	Control	Ele2	2013-05-04	12:10:00	400	4	57	0	0	57	0
B-0	4	Control	Ele2	2013-05-04	12:10:00	400	5	30	0	0	117	1
B-0	4	Control	Ele2	2013-05-04	12:10:00	400	6	30	0	0	30	0
B-0	4	Control	Ele2	2013-05-04	12:10:00	400	7	37	0	0	37	0
B-0	4	Control	Ele2	2013-05-04	12:10:00	400	8	100	1	0	160	4
B-0	4	Control	Ele2	2013-05-04	12:10:00	400	9	65	0	0	65	0
B-0	4	Control	Ele2	2013-05-04	12:10:00	400	10	41	0	0	41	0
B-0	4	Control	Ele2	2013-05-04	12:10:00	400	11	39	0	0	39	0
B-0	4	Control	Ele2	2013-05-04	12:10:00	400	12	30	0	0	30	0
B-0	4	Control	Ele2	2013-05-04	12:10:00	400	13	34	0	0	34	0
B-0	4	Control	Ele2	2013-05-04	12:10:00	400	14	44	0	0	44	0
B-0	4	Control	Ele2	2013-05-04	12:10:00	400	15	42	0	0	42	0
B-0	4	Control	Ele2	2013-05-04	12:10:00	400	16	64	0	0	64	0
B-0	4	Control	Ele2	2013-05-04	12:10:00	400	17	34	0	0	34	0
B-0	4	Control	Ele2	2013-05-04	12:10:00	400	18	94	0	0	94	0
B-0	4	Control	Ele2	2013-05-04	12:10:00	400	19	45	0	0	45	0
B-0	4	Control	Ele2	2013-05-04	12:10:00	400	20	42	0	0	42	0
TOTAL	4	Control	Ele2	2013-05-04	12:10:00	400		43.85	2	1	60.5	12	1
B-0	4	Control	Ele3	2013-05-06	16:50:00	400	1	13	0	1	93	2
B-0	4	Control	Ele3	2013-05-06	16:50:00	400	2	30	0	1	120	4
B-0	4	Control	Ele3	2013-05-06	16:50:00	400	3	7	1	0	65	4
B-0	4	Control	Ele3	2013-05-06	16:50:00	400	4	35	0	0	35	0
B-0	4	Control	Ele3	2013-05-06	16:50:00	400	5	57	0	0	57	0
B-0	4	Control	Ele3	2013-05-06	16:50:00	400	6	60	0	0	60	0
B-0	4	Control	Ele3	2013-05-06	16:50:00	400	7	40	0	0	40	0
B-0	4	Control	Ele3	2013-05-06	16:50:00	400	8	42	0	0	42	0
B-0	4	Control	Ele3	2013-05-06	16:50:00	400	9	34	0	0	34	0
B-0	4	Control	Ele3	2013-05-06	16:50:00	400	10	65	0	0	65	0
B-0	4	Control	Ele3	2013-05-06	16:50:00	400	11	32	0	0	32	0
B-0	4	Control	Ele3	2013-05-06	16:50:00	400	12	38	0	0	38	0
B-0	4	Control	Ele3	2013-05-06	16:50:00	400	13	50	0	0	50	0
B-0	4	Control	Ele3	2013-05-06	16:50:00	400	14	63	0	0	63	0
B-0	4	Control	Ele3	2013-05-06	16:50:00	400	15	71	0	0	71	0
B-0	4	Control	Ele3	2013-05-06	16:50:00	400	16	35	0	0	35	0
B-0	4	Control	Ele3	2013-05-06	16:50:00	400	17	50	0	0	50	0
B-0	4	Control	Ele3	2013-05-06	16:50:00	400	18	40	0	0	40	0
B-0	4	Control	Ele3	2013-05-06	16:50:00	400	19	5	0	1	65	0
B-0	4	Control	Ele3	2013-05-06	16:50:00	400	20	32	0	0	32	0
TOTAL	4	Control	Ele3	2013-05-06	16:50:00	400		39.95	1	3	54.35	10	1
B-0	4	Control	Ele4	2013-05-07	08:00:00	400	1	7	0	1	76	2
B-0	4	Control	Ele4	2013-05-07	08:00:00	400	2	35	0	0	35	0
B-0	4	Control	Ele4	2013-05-07	08:00:00	400	3	34	0	0	34	0
B-0	4	Control	Ele4	2013-05-07	08:00:00	400	4	35	0	0	35	0
B-0	4	Control	Ele4	2013-05-07	08:00:00	400	5	60	0	0	60	0
B-0	4	Control	Ele4	2013-05-07	08:00:00	400	6	34	1	0	99	0
B-0	4	Control	Ele4	2013-05-07	08:00:00	400	7	30	0	0	30	0
B-0	4	Control	Ele4	2013-05-07	08:00:00	400	8	30	0	0	30	0
B-0	4	Control	Ele4	2013-05-07	08:00:00	400	9	40	0	0	40	0
B-0	4	Control	Ele4	2013-05-07	08:00:00	400	10	35	0	0	35	0
B-0	4	Control	Ele4	2013-05-07	08:00:00	400	11	53	0	0	53	0
B-0	4	Control	Ele4	2013-05-07	08:00:00	400	12	33	0	0	33	0
B-0	4	Control	Ele4	2013-05-07	08:00:00	400	13	56	0	0	56	0
B-0	4	Control	Ele4	2013-05-07	08:00:00	400	14	35	0	0	35	0
B-0	4	Control	Ele4	2013-05-07	08:00:00	400	15	49	0	0	49	0
B-0	4	Control	Ele4	2013-05-07	08:00:00	400	16	32	0	0	32	0
B-0	4	Control	Ele4	2013-05-07	08:00:00	400	17	37	0	0	37	0
B-0	4	Control	Ele4	2013-05-07	08:00:00	400	18	39	0	0	39	0
B-0	4	Control	Ele4	2013-05-07	08:00:00	400	19	50	0	0	50	0
B-0	4	Control	Ele4	2013-05-07	08:00:00	400	20	65	0	0	65	0
TOTAL	4	Control	Ele4	2013-05-07	08:00:00	400		39.45	1	1	46.15	2	1
B-1A	5	Control	Hab1	2013-05-07	08:35:00	375	0	300	0	0	300	4
B-1A	5	Control	Hab2	2013-05-08	08:35:00	375	0	300	0	0	300	4
B-1A	5	Control	Forz	2013-05-10	08:00:00	375	1	65	0	1	125	0
B-1A	5	Control	Forz	2013-05-10	08:00:00	375	2	65	0	0	65	0
B-1A	5	Control	Forz	2013-05-10	08:00:00	375	3	60	0	0	60	0
B-1A	5	Control	Forz	2013-05-10	08:00:00	375	4	60	0	0	60	0
B-1A	5	Control	Forz	2013-05-10	08:00:00	375	5	60	0	0	60	0
B-1A	5	Control	Forz	2013-05-10	08:00:00	375	6	60	0	0	60	0
B-1A	5	Control	Forz	2013-05-10	08:00:00	375	7	71	0	0	71	0
B-1A	5	Control	Forz	2013-05-10	08:00:00	375	8	60	0	0	60	0
B-1A	5	Control	Forz	2013-05-10	08:00:00	375	9	43	0	0	43	0
B-1A	5	Control	Forz	2013-05-10	08:00:00	375	10	64	0	0	64	0
B-1A	5	Control	Forz	2013-05-10	08:00:00	375	11	72	0	0	72	0
B-1A	5	Control	Forz	2013-05-10	08:00:00	375	12	60	0	0	60	0
B-1A	5	Control	Forz	2013-05-10	08:00:00	375	13	61	0	0	61	0
B-1A	5	Control	Forz	2013-05-10	08:00:00	375	14	61	0	0	61	0
B-1A	5	Control	Forz	2013-05-10	08:00:00	375	15	60	0	0	60	0
B-1A	5	Control	Forz	2013-05-10	08:00:00	375	16	69	0	0	69	0
B-1A	5	Control	Forz	2013-05-10	08:00:00	375	17	60	0	0	60	0
B-1A	5	Control	Forz	2013-05-10	08:00:00	375	18	62	0	0	62	0
B-1A	5	Control	Forz	2013-05-10	08:00:00	375	19	60	0	0	60	0
B-1A	5	Control	Forz	2013-05-10	08:00:00	375	20	86	0	0	86	0
B-1A	5	Control	Ele1	2013-05-11	11:15:00	375	1	33	0	0	33	0
B-1A	5	Control	Ele1	2013-05-11	11:15:00	375	2	44	0	0	44	0
B-1A	5	Control	Ele1	2013-05-11	11:15:00	375	3	53	0	0	53	0
B-1A	5	Control	Ele1	2013-05-11	11:15:00	375	4	45	0	0	45	0
B-1A	5	Control	Ele1	2013-05-11	11:15:00	375	5	47	0	0	47	0
B-1A	5	Control	Ele1	2013-05-11	11:15:00	375	6	50	0	0	50	0
B-1A	5	Control	Ele1	2013-05-11	11:15:00	375	7	49	0	0	49	0
B-1A	5	Control	Ele1	2013-05-11	11:15:00	375	8	40	0	0	40	0
B-1A	5	Control	Ele1	2013-05-11	11:15:00	375	9	35	0	0	35	0
B-1A	5	Control	Ele1	2013-05-11	11:15:00	375	10	35	0	0	35	0
B-1A	5	Control	Ele1	2013-05-11	11:15:00	375	11	60	0	0	60	0
B-1A	5	Control	Ele1	2013-05-11	11:15:00	375	12	50	0	0	50	0
B-1A	5	Control	Ele1	2013-05-11	11:15:00	375	13	70	0	0	70	0
B-1A	5	Control	Ele1	2013-05-11	11:15:00	375	14	60	0	0	60	0
B-1A	5	Control	Ele1	2013-05-11	11:15:00	375	15	60	0	0	60	0
B-1A	5	Control	Ele1	2013-05-11	11:15:00	375	16	71	0	0	71	0
B-1A	5	Control	Ele1	2013-05-11	11:15:00	375	17	84	0	0	84	0
B-1A	5	Control	Ele1	2013-05-11	11:15:00	375	18	32	0	0	32	0
B-1A	5	Control	Ele1	2013-05-11	11:15:00	375	19	25	0	1	68	2
B-1A	5	Control	Ele1	2013-05-11	11:15:00	375	20	35	0	0	35	0
TOTAL	5	Control	Ele1	2013-05-11	11:15:00	375		48.9	0	1	51.05	2	0
B-1A	5	Control	Ele2	2013-05-12	11:15:00	375	1	34	0	0	34	0
B-1A	5	Control	Ele2	2013-05-12	11:15:00	375	2	70	0	0	70	0
B-1A	5	Control	Ele2	2013-05-12	11:15:00	375	3	54	0	0	54	0
B-1A	5	Control	Ele2	2013-05-12	11:15:00	375	4	36	0	0	36	0
B-1A	5	Control	Ele2	2013-05-12	11:15:00	375	5	15	0	1	75	1
B-1A	5	Control	Ele2	2013-05-12	11:15:00	375	6	62	0	0	62	0
B-1A	5	Control	Ele2	2013-05-12	11:15:00	375	7	30	0	0	30	0
B-1A	5	Control	Ele2	2013-05-12	11:15:00	375	8	35	0	0	35	0
B-1A	5	Control	Ele2	2013-05-12	11:15:00	375	9	55	0	0	55	0
B-1A	5	Control	Ele2	2013-05-12	11:15:00	375	10	57	0	0	57	0
B-1A	5	Control	Ele2	2013-05-12	11:15:00	375	11	48	0	0	48	0
B-1A	5	Control	Ele2	2013-05-12	11:15:00	375	12	58	0	0	58	0
B-1A	5	Control	Ele2	2013-05-12	11:15:00	375	13	34	0	0	34	1
B-1A	5	Control	Ele2	2013-05-12	11:15:00	375	14	58	0	0	58	1
B-1A	5	Control	Ele2	2013-05-12	11:15:00	375	15	77	0	0	77	1
B-1A	5	Control	Ele2	2013-05-12	11:15:00	375	16	12	0	1	74	4
B-1A	5	Control	Ele2	2013-05-12	11:15:00	375	17	9	1	0	60	1
B-1A	5	Control	Ele2	2013-05-12	11:15:00	375	18	33	0	0	33	0
B-1A	5	Control	Ele2	2013-05-12	11:15:00	375	19	37	0	0	37	0
B-1A	5	Control	Ele2	2013-05-12	11:15:00	375	20	48	0	1	48	0
TOTAL	5	Control	Ele2	2013-05-12	11:15:00	375		43.1	1	3	51.75	9	1
B-1A	5	Control	Ele3	2013-05-13	11:35:00	375	1	15	0	0	140	3
B-1A	5	Control	Ele3	2013-05-13	11:35:00	375	2	33	0	0	33	0
B-1A	5	Control	Ele3	2013-05-13	11:35:00	375	3	64	0	0	64	0
B-1A	5	Control	Ele3	2013-05-13	11:35:00	375	4	42	0	0	42	0
B-1A	5	Control	Ele3	2013-05-13	11:35:00	375	5	47	0	0	47	0
B-1A	5	Control	Ele3	2013-05-13	11:35:00	375	6	45	0	0	45	0
B-1A	5	Control	Ele3	2013-05-13	11:35:00	375	7	60	0	0	60	0
B-1A	5	Control	Ele3	2013-05-13	11:35:00	375	8	30	0	0	30	0
B-1A	5	Control	Ele3	2013-05-13	11:35:00	375	9	30	0	0	30	0
B-1A	5	Control	Ele3	2013-05-13	11:35:00	375	10	41	0	0	41	0
B-1A	5	Control	Ele3	2013-05-13	11:35:00	375	11	54	0	0	54	0
B-1A	5	Control	Ele3	2013-05-13	11:35:00	375	12	38	0	0	38	0
B-1A	5	Control	Ele3	2013-05-13	11:35:00	375	13	51	0	1	120	1
B-1A	5	Control	Ele3	2013-05-13	11:35:00	375	14	6	0	1	90	1
B-1A	5	Control	Ele3	2013-05-13	11:35:00	375	15	31	0	0	31	0
B-1A	5	Control	Ele3	2013-05-13	11:35:00	375	16	40	0	0	40	0
B-1A	5	Control	Ele3	2013-05-13	11:35:00	375	17	30	0	0	30	0
B-1A	5	Control	Ele3	2013-05-13	11:35:00	375	18	50	0	0	50	0
B-1A	5	Control	Ele3	2013-05-13	11:35:00	375	19	35	0	0	35	0
B-1A	5	Control	Ele3	2013-05-13	11:35:00	375	20	46	0	0	46	0
TOTAL	5	Control	Ele3	2013-05-13	11:35:00	375		39.4	0	2	53.3	5	0
B-1A	5	Control	Ele4	2013-05-14	11:40:00	375	1	46	0	0	46	0
B-1A	5	Control	Ele4	2013-05-14	11:40:00	375	2	30	0	1	60	4
B-1A	5	Control	Ele4	2013-05-14	11:40:00	375	3	34	0	0	34	0
B-1A	5	Control	Ele4	2013-05-14	11:40:00	375	4	75	0	0	75	0
B-1A	5	Control	Ele4	2013-05-14	11:40:00	375	5	30	0	1	72	1
B-1A	5	Control	Ele4	2013-05-14	11:40:00	375	6	35	0	0	35	0
B-1A	5	Control	Ele4	2013-05-14	11:40:00	375	7	57	0	0	57	0
B-1A	5	Control	Ele4	2013-05-14	11:40:00	375	8	58	0	0	58	0
B-1A	5	Control	Ele4	2013-05-14	11:40:00	375	9	30	0	0	30	0
B-1A	5	Control	Ele4	2013-05-14	11:40:00	375	10	45	0	0	45	0
B-1A	5	Control	Ele4	2013-05-14	11:40:00	375	11	40	0	0	40	0
B-1A	5	Control	Ele4	2013-05-14	11:40:00	375	12	30	0	0	30	0
B-1A	5	Control	Ele4	2013-05-14	11:40:00	375	13	30	0	0	30	0
B-1A	5	Control	Ele4	2013-05-14	11:40:00	375	14	30	0	0	30	0
B-1A	5	Control	Ele4	2013-05-14	11:40:00	375	15	54	0	0	54	0
B-1A	5	Control	Ele4	2013-05-14	11:40:00	375	16	54	0	0	54	0
B-1A	5	Control	Ele4	2013-05-14	11:40:00	375	17	35	0	0	35	0
B-1A	5	Control	Ele4	2013-05-14	11:40:00	375	18	40	0	0	40	0
B-1A	5	Control	Ele4	2013-05-14	11:40:00	375	19	31	0	0	31	0
B-1A	5	Control	Ele4	2013-05-14	11:40:00	375	20	45	0	0	45	0
TOTAL	5	Control	Ele4	2013-05-14	11:40:00	375		41.45	0	2	45.05	5	0
B-3A	6	Control	Hab1	2013-05-14	10:25:00	400	0	300	0	0	300	4
B-3A	6	Control	Hab2	2013-05-15	12:10:00	400	0	300	0	0	300	4
B-3A	6	Control	Forz	2013-05-16	17:40:00	400	1	8	0	1	90	3
B-3A	6	Control	Forz	2013-05-16	17:40:00	400	2	11	1	0	90	0
B-3A	6	Control	Forz	2013-05-16	17:40:00	400	3	36	0	0	36	0
B-3A	6	Control	Forz	2013-05-16	17:40:00	400	4	13	1	0	84	0
B-3A	6	Control	Forz	2013-05-16	17:40:00	400	5	28	0	1	82	2
B-3A	6	Control	Forz	2013-05-16	17:40:00	400	6	21	1	0	80	0
B-3A	6	Control	Forz	2013-05-16	17:40:00	400	7	40	0	0	40	0
B-3A	6	Control	Forz	2013-05-16	17:40:00	400	8	12	1	0	81	0
B-3A	6	Control	Forz	2013-05-16	17:40:00	400	9	12	0	1	72	1
B-3A	6	Control	Forz	2013-05-16	17:40:00	400	10	51	1	0	111	0
B-3A	6	Control	Forz	2013-05-16	17:40:00	400	11	30	0	1	80	2
B-3A	6	Control	Forz	2013-05-16	17:40:00	400	12	40	0	0	40	0
B-3A	6	Control	Forz	2013-05-16	17:40:00	400	13	40	0	0	40	0
B-3A	6	Control	Forz	2013-05-16	17:40:00	400	14	58	0	0	58	0
B-3A	6	Control	Forz	2013-05-16	17:40:00	400	15	30	0	0	120	4
B-3A	6	Control	Forz	2013-05-16	17:40:00	400	16	30	0	0	30	0
B-3A	6	Control	Forz	2013-05-16	17:40:00	400	17	9	0	1	69	3
B-3A	6	Control	Forz	2013-05-16	17:40:00	400	18	30	0	0	30	0
B-3A	6	Control	Forz	2013-05-16	17:40:00	400	19	30	0	0	30	0
B-3A	6	Control	Forz	2013-05-16	17:40:00	400	20	60	0	0	60	0
B-3A	6	Control	Ele1	2013-05-17	10:00:00	400	1	30	0	1	90	4
B-3A	6	Control	Ele1	2013-05-17	10:00:00	400	2	30	1	0	90	3
B-3A	6	Control	Ele1	2013-05-17	10:00:00	400	3	12	0	1	53	0
B-3A	6	Control	Ele1	2013-05-17	10:00:00	400	4	35	0	0	35	0
B-3A	6	Control	Ele1	2013-05-17	10:00:00	400	5	35	0	0	35	0
B-3A	6	Control	Ele1	2013-05-17	10:00:00	400	6	42	0	0	42	0
B-3A	6	Control	Ele1	2013-05-17	10:00:00	400	7	30	0	0	30	0
B-3A	6	Control	Ele1	2013-05-17	10:00:00	400	8	35	0	0	35	0
B-3A	6	Control	Ele1	2013-05-17	10:00:00	400	9	30	0	0	30	0
B-3A	6	Control	Ele1	2013-05-17	10:00:00	400	10	35	0	0	35	0
B-3A	6	Control	Ele1	2013-05-17	10:00:00	400	11	28	0	1	84	3
B-3A	6	Control	Ele1	2013-05-17	10:00:00	400	12	10	1	0	56	3
B-3A	6	Control	Ele1	2013-05-17	10:00:00	400	13	35	0	0	35	0
B-3A	6	Control	Ele1	2013-05-17	10:00:00	400	14	38	0	0	38	0
B-3A	6	Control	Ele1	2013-05-17	10:00:00	400	15	35	0	0	35	0
B-3A	6	Control	Ele1	2013-05-17	10:00:00	400	16	35	0	0	35	0
B-3A	6	Control	Ele1	2013-05-17	10:00:00	400	17	5	1	0	85	4
B-3A	6	Control	Ele1	2013-05-17	10:00:00	400	18	30	0	0	30	0
B-3A	6	Control	Ele1	2013-05-17	10:00:00	400	19	30	0	0	30	0
B-3A	6	Control	Ele1	2013-05-17	10:00:00	400	20	35	0	0	35	0
TOTAL	6	Control	Ele1	2013-05-17	10:00:00	400		29.75	3	3	46.9	17	2
B-3A	6	Control	Ele2	2013-05-18	09:30:00	400	1	6	1	0	30	4
B-3A	6	Control	Ele2	2013-05-18	09:30:00	400	2	10	0	1	77	3
B-3A	6	Control	Ele2	2013-05-18	09:30:00	400	3	20	0	1	79	4
B-3A	6	Control	Ele2	2013-05-18	09:30:00	400	4	15	1	0	75	3
B-3A	6	Control	Ele2	2013-05-18	09:30:00	400	5	30	0	0	30	0
B-3A	6	Control	Ele2	2013-05-18	09:30:00	400	6	10	0	1	63	4
B-3A	6	Control	Ele2	2013-05-18	09:30:00	400	7	43	0	0	43	0
B-3A	6	Control	Ele2	2013-05-18	09:30:00	400	8	37	0	0	37	0
B-3A	6	Control	Ele2	2013-05-18	09:30:00	400	9	33	0	0	33	0
B-3A	6	Control	Ele2	2013-05-18	09:30:00	400	10	39	0	0	39	0
B-3A	6	Control	Ele2	2013-05-18	09:30:00	400	11	32	0	0	32	0
B-3A	6	Control	Ele2	2013-05-18	09:30:00	400	12	12	1	0	49	3
B-3A	6	Control	Ele2	2013-05-18	09:30:00	400	13	47	0	0	47	0
B-3A	6	Control	Ele2	2013-05-18	09:30:00	400	14	36	0	0	36	0
B-3A	6	Control	Ele2	2013-05-18	09:30:00	400	15	35	0	0	35	0
B-3A	6	Control	Ele2	2013-05-18	09:30:00	400	16	55	0	0	55	0
B-3A	6	Control	Ele2	2013-05-18	09:30:00	400	17	37	0	0	37	0
B-3A	6	Control	Ele2	2013-05-18	09:30:00	400	18	7	1	0	72	4
B-3A	6	Control	Ele2	2013-05-18	09:30:00	400	19	69	0	0	69	0
B-3A	6	Control	Ele2	2013-05-18	09:30:00	400	20	30	0	1	58	4
TOTAL	6	Control	Ele2	2013-05-18	09:30:00	400		30.15	4	4	49.8	29	4
B-3A	6	Control	Ele3	2013-05-19	10:30:00	400	1	8	1	0	81	4
B-3A	6	Control	Ele3	2013-05-19	10:30:00	400	2	20	1	0	65	4
B-3A	6	Control	Ele3	2013-05-19	10:30:00	400	3	6	0	1	69	3
B-3A	6	Control	Ele3	2013-05-19	10:30:00	400	4	7	1	0	56	4
B-3A	6	Control	Ele3	2013-05-19	10:30:00	400	5	42	0	0	42	0
B-3A	6	Control	Ele3	2013-05-19	10:30:00	400	6	6	1	0	56	4
B-3A	6	Control	Ele3	2013-05-19	10:30:00	400	7	5	1	0	47	4
B-3A	6	Control	Ele3	2013-05-19	10:30:00	400	8	11	1	0	11	0
B-3A	6	Control	Ele3	2013-05-19	10:30:00	400	9	10	1	0	66	4
B-3A	6	Control	Ele3	2013-05-19	10:30:00	400	10	18	1	0	73	4
B-3A	6	Control	Ele3	2013-05-19	10:30:00	400	11	30	0	0	30	0
B-3A	6	Control	Ele3	2013-05-19	10:30:00	400	12	36	0	0	36	0
B-3A	6	Control	Ele3	2013-05-19	10:30:00	400	13	32	0	0	32	0
B-3A	6	Control	Ele3	2013-05-19	10:30:00	400	14	47	0	0	47	0
B-3A	6	Control	Ele3	2013-05-19	10:30:00	400	15	37	0	0	37	0
B-3A	6	Control	Ele3	2013-05-19	10:30:00	400	16	31	0	0	31	0
B-3A	6	Control	Ele3	2013-05-19	10:30:00	400	17	37	0	0	37	0
B-3A	6	Control	Ele3	2013-05-19	10:30:00	400	18	30	0	0	30	0
B-3A	6	Control	Ele3	2013-05-19	10:30:00	400	19	34	0	0	34	0
B-3A	6	Control	Ele3	2013-05-19	10:30:00	400	20	60	0	0	60	0
TOTAL	6	Control	Ele3	2013-05-19	10:30:00	400		25.35	8	1	47	31	1
B-3A	6	Control	Ele4	2013-05-20	11:15:00	400	1	10	1	0	75	4
B-3A	6	Control	Ele4	2013-05-20	11:15:00	400	2	9	1	0	61	4
B-3A	6	Control	Ele4	2013-05-20	11:15:00	400	3	6	0	1	37	4
B-3A	6	Control	Ele4	2013-05-20	11:15:00	400	4	6	0	1	51	4
B-3A	6	Control	Ele4	2013-05-20	11:15:00	400	5	4	1	0	52	4
B-3A	6	Control	Ele4	2013-05-20	11:15:00	400	6	6	0	1	37	4
B-3A	6	Control	Ele4	2013-05-20	11:15:00	400	7	35	0	0	35	0
B-3A	6	Control	Ele4	2013-05-20	11:15:00	400	8	5	1	0	54	4
B-3A	6	Control	Ele4	2013-05-20	11:15:00	400	9	32	0	0	32	0
B-3A	6	Control	Ele4	2013-05-20	11:15:00	400	10	34	0	0	34	0
B-3A	6	Control	Ele4	2013-05-20	11:15:00	400	11	37	0	0	37	0
B-3A	6	Control	Ele4	2013-05-20	11:15:00	400	12	20	1	0	20	3
B-3A	6	Control	Ele4	2013-05-20	11:15:00	400	13	12	0	1	12	0
B-3A	6	Control	Ele4	2013-05-20	11:15:00	400	14	48	0	0	48	0
B-3A	6	Control	Ele4	2013-05-20	11:15:00	400	15	5	1	0	56	4
B-3A	6	Control	Ele4	2013-05-20	11:15:00	400	16	6	1	0	53	4
B-3A	6	Control	Ele4	2013-05-20	11:15:00	400	17	30	1	0	58	0
B-3A	6	Control	Ele4	2013-05-20	11:15:00	400	18	25	0	1	76	4
B-3A	6	Control	Ele4	2013-05-20	11:15:00	400	19	30	1	0	60	4
B-3A	6	Control	Ele4	2013-05-20	11:15:00	400	20	30	1	0	120	4
TOTAL	6	Control	Ele4	2013-05-20	11:15:00	400		19.5	10	5	50.4	51	5
D-0	7	Control	Hab1	2013-06-15	11:20:00	400	0	300	0	0	300	4
D-0	7	Control	Hab2	2013-06-16	11:20:00	400	0	300	0	0	300	4
D-0	7	Control	Forz	2013-06-18	11:20:00	460	1	5	1	0	67	4
D-0	7	Control	Forz	2013-06-18	11:20:00	460	2	9	0	1	66	4
D-0	7	Control	Forz	2013-06-18	11:20:00	460	3	5	1	0	51	0
D-0	7	Control	Forz	2013-06-18	11:20:00	460	4	5	0	1	66	4
D-0	7	Control	Forz	2013-06-18	11:20:00	460	5	5	1	0	45	0
D-0	7	Control	Forz	2013-06-18	11:20:00	460	6	6	0	1	66	4
D-0	7	Control	Forz	2013-06-18	11:20:00	460	7	5	1	0	56	2
D-0	7	Control	Forz	2013-06-18	11:20:00	460	8	7	0	1	66	4
D-0	7	Control	Forz	2013-06-18	11:20:00	460	9	4	1	0	40	4
D-0	7	Control	Forz	2013-06-18	11:20:00	460	10	22	0	1	82	4
D-0	7	Control	Forz	2013-06-18	11:20:00	460	11	5	1	0	65	4
D-0	7	Control	Forz	2013-06-18	11:20:00	460	12	3	0	1	63	4
D-0	7	Control	Forz	2013-06-18	11:20:00	460	13	3	1	0	59	4
D-0	7	Control	Forz	2013-06-18	11:20:00	460	14	3	0	1	63	4
D-0	7	Control	Forz	2013-06-18	11:20:00	460	15	21	1	0	55	3
D-0	7	Control	Forz	2013-06-18	11:20:00	460	16	11	0	1	71	4
D-0	7	Control	Forz	2013-06-18	11:20:00	460	17	3	1	0	69	4
D-0	7	Control	Forz	2013-06-18	11:20:00	460	18	2	0	1	62	3
D-0	7	Control	Forz	2013-06-18	11:20:00	460	19	3	1	0	63	4
D-0	7	Control	Forz	2013-06-18	11:20:00	460	20	9	0	1	69	4
D-0	7	Control	Ele1	2013-06-19	07:30:00	460	1	4	0	1	30	4
D-0	7	Control	Ele1	2013-06-19	07:30:00	460	2	9	0	1	48	4
D-0	7	Control	Ele1	2013-06-19	07:30:00	460	3	7	0	1	49	4
D-0	7	Control	Ele1	2013-06-19	07:30:00	460	4	7	0	1	34	4
D-0	7	Control	Ele1	2013-06-19	07:30:00	460	5	8	0	1	30	4
D-0	7	Control	Ele1	2013-06-19	07:30:00	460	6	6	0	1	35	4
D-0	7	Control	Ele1	2013-06-19	07:30:00	460	7	7	0	1	39	4
D-0	7	Control	Ele1	2013-06-19	07:30:00	460	8	4	0	1	42	4
D-0	7	Control	Ele1	2013-06-19	07:30:00	460	9	30	0	1	33	4
D-0	7	Control	Ele1	2013-06-19	07:30:00	460	10	5	0	1	34	4
D-0	7	Control	Ele1	2013-06-19	07:30:00	460	11	3	0	1	30	4
D-0	7	Control	Ele1	2013-06-19	07:30:00	460	12	8	0	1	30	4
D-0	7	Control	Ele1	2013-06-19	07:30:00	460	13	4	0	1	35	4
D-0	7	Control	Ele1	2013-06-19	07:30:00	460	14	14	0	1	60	4
D-0	7	Control	Ele1	2013-06-19	07:30:00	460	15	3	0	1	63	4
D-0	7	Control	Ele1	2013-06-19	07:30:00	460	16	30	0	0	30	4
D-0	7	Control	Ele1	2013-06-19	07:30:00	460	17	3	0	1	35	4
D-0	7	Control	Ele1	2013-06-19	07:30:00	460	18	7	0	1	49	4
D-0	7	Control	Ele1	2013-06-19	07:30:00	460	19	6	0	1	40	4
D-0	7	Control	Ele1	2013-06-19	07:30:00	460	20	4	0	1	40	4
TOTAL	7	Control	Ele1	2013-06-19	07:30:00	460		8.45	0	19	39.3	80	0
D-0	7	Control	Ele2	2013-06-20	07:30:00	430	1	3	1	0	55	2
D-0	7	Control	Ele2	2013-06-20	07:30:00	430	2	7	0	1	64	4
D-0	7	Control	Ele2	2013-06-20	07:30:00	430	3	4	0	1	60	4
D-0	7	Control	Ele2	2013-06-20	07:30:00	430	4	3	0	1	53	4
D-0	7	Control	Ele2	2013-06-20	07:30:00	430	5	5	0	1	62	3
D-0	7	Control	Ele2	2013-06-20	07:30:00	430	6	5	0	1	63	4
D-0	7	Control	Ele2	2013-06-20	07:30:00	430	7	2	0	1	65	3
D-0	7	Control	Ele2	2013-06-20	07:30:00	430	8	1	0	1	63	3
D-0	7	Control	Ele2	2013-06-20	07:30:00	430	9	2	1	0	63	4
D-0	7	Control	Ele2	2013-06-20	07:30:00	430	10	1	0	1	68	3
D-0	7	Control	Ele2	2013-06-20	07:30:00	430	11	1	0	1	61	4
D-0	7	Control	Ele2	2013-06-20	07:30:00	430	12	1	0	1	53	4
D-0	7	Control	Ele2	2013-06-20	07:30:00	430	13	1	0	1	60	4
D-0	7	Control	Ele2	2013-06-20	07:30:00	430	14	1	0	1	62	4
D-0	7	Control	Ele2	2013-06-20	07:30:00	430	15	2	0	1	54	4
D-0	7	Control	Ele2	2013-06-20	07:30:00	430	16	9	0	1	71	4
D-0	7	Control	Ele2	2013-06-20	07:30:00	430	17	11	0	1	70	4
D-0	7	Control	Ele2	2013-06-20	07:30:00	430	18	1	0	1	60	4
D-0	7	Control	Ele2	2013-06-20	07:30:00	430	19	1	0	1	60	4
D-0	7	Control	Ele2	2013-06-20	07:30:00	430	20	1	0	1	60	4
TOTAL	7	Control	Ele2	2013-06-20	07:30:00	430		3.1	2	18	61.35	74	2
D-0	7	Control	Ele3	2013-06-21	10:00:00	430	1	2	1	0	62	3
D-0	7	Control	Ele3	2013-06-21	10:00:00	430	2	2	0	1	56	4
D-0	7	Control	Ele3	2013-06-21	10:00:00	430	3	2	0	1	66	4
D-0	7	Control	Ele3	2013-06-21	10:00:00	430	4	2	1	0	56	4
D-0	7	Control	Ele3	2013-06-21	10:00:00	430	5	1	0	1	62	4
D-0	7	Control	Ele3	2013-06-21	10:00:00	430	6	1	0	1	56	4
D-0	7	Control	Ele3	2013-06-21	10:00:00	430	7	7	0	1	61	4
D-0	7	Control	Ele3	2013-06-21	10:00:00	430	8	1	0	1	55	4
D-0	7	Control	Ele3	2013-06-21	10:00:00	430	9	1	0	1	51	4
D-0	7	Control	Ele3	2013-06-21	10:00:00	430	10	1	0	1	50	3
D-0	7	Control	Ele3	2013-06-21	10:00:00	430	11	1	0	1	56	4
D-0	7	Control	Ele3	2013-06-21	10:00:00	430	12	1	0	1	56	4
D-0	7	Control	Ele3	2013-06-21	10:00:00	430	13	6	0	1	56	4
D-0	7	Control	Ele3	2013-06-21	10:00:00	430	14	6	0	1	56	4
D-0	7	Control	Ele3	2013-06-21	10:00:00	430	15	4	0	1	54	3
D-0	7	Control	Ele3	2013-06-21	10:00:00	430	16	4	0	1	54	4
D-0	7	Control	Ele3	2013-06-21	10:00:00	430	17	8	0	1	53	4
D-0	7	Control	Ele3	2013-06-21	10:00:00	430	18	1	0	1	51	4
D-0	7	Control	Ele3	2013-06-21	10:00:00	430	19	1	0	1	50	4
D-0	7	Control	Ele3	2013-06-21	10:00:00	430	20	1	0	1	60	4
TOTAL	7	Control	Ele3	2013-06-21	10:00:00	430		2.65	2	18	56.05	77	2
D-0	7	Control	Ele4	2013-06-22	11:05:00	425	1	5	1	0	47	4
D-0	7	Control	Ele4	2013-06-22	11:05:00	425	2	4	0	1	35	4
D-0	7	Control	Ele4	2013-06-22	11:05:00	425	3	6	0	1	36	4
D-0	7	Control	Ele4	2013-06-22	11:05:00	425	4	3	0	1	28	4
[truncated: 230 more rows]

## Sheet: TABLA DE RESUMEN
		Choice day 1																		Choice day 2																		Choice day 3
					Frequency				Percent				Response time										Frequency				Percent				Response time										Frequency				Percent				Response time
Animal	Group	Session	Time	Weight	Ele1d	Ele1i	WM1	%WM	Ele1d	Ele1i	Mw1	Preference Index	Mean	SD	S.E.M.	Trial time	SD	S.E.M.	Food	Session	Time	Weight	Ele2d	Ele2i	Mw2	% Mw2	Ele2d	Ele2i	Mw2	Preference Index	Mean	SD	S.E.M.	Trial time	SD	S.E.M.	Food	Session	Time	Weight	Ele3d	Ele3i	Mw3	% Mw3	Ele3d	Ele3i	Mw3	Preference Index	Mean
1	Exp	E1	15:30:00	450	2	4	0.2	20	33.3333	66.6667	33.3333	-0.333333	38.6	17.4308	3.89764	65.25	35.4666	7.93058	7	E2	12:30:00	450	2	3	0.3	30	40	60	60	-0.2	37.1	9.07222	2.02861	54.55	30.0779	6.72563	16	E3	10:45:00	450	5	8	0.5	50	38.4615	61.5385	38.4615	-0.230769	27.35
2	Exp	E1	12:00:00	380	2	0	0.1	10	66.6667	0	33.3333	1	42.9	14.7538	3.29904	56.4	20.4281	4.56785	15	E2	11:50:00	380	4	2	0.2	20	66.6667	33.3333	33.3333	0.333333	34.65	19.1731	4.28724	45.05	12.9146	2.88779	17	E3	12:12:00	380	2	2	0.1	10	50	50	25	0	35.85
3	Exp	E1	12:30:00	480	3	4	0.2	20	42.8571	57.1429	28.5714	-0.142857	34.05	10.0235	2.24133	49.7	18.7619	4.1953	26	E2	12:20:00	480	4	10	0.4	40	28.5714	71.4286	28.5714	-0.428571	28.25	13.5097	3.02087	57.3	18.59	4.15686	53	E3	11:00:00	480	2	2	0.2	20	50	50	50	0	38.3
4	Exp	E1	13:15:00	450	4	16	0.4	40	20	80	20	-0.6	8.55	9.32724	2.08563	43.95	18.369	4.10742	80	E2	13:00:00	450	6	14	0.4	40	30	70	20	-0.4	7.25	4.94043	1.10471	49.45	20.7097	4.51923	70	E3	10:20:00	450	8	12	0.8	80	40	60	40	-0.2	14.8
5	Exp	E1	10:30:00	430	3	2	0.2	20	60	40	40	0.2	34.75	15.4813	3.46173	48	18.5982	4.15869	16	E2	10:40:00	430	1	0	0	0	100	0	0	1	42.1	10.8574	2.4278	45.7	11.8903	2.65875	4	E3	12:50:00	430	0	1	0	0	0	100	0	-1	38.05
6	Exp	E1	12:20:00	460	2	4	0.2	20	33.3333	66.6667	33.3333	-0.333333	31.55	9.2479	2.06789	46.95	19.3839	4.33436	15	E2	10:10:00	460	7	3	0.3	30	70	30	30	0.4	43.75	14.8142	3.31256	72.7	34.8078	7.78327	34	E3	11:00:00	460	7	1	0.1	10	87.5	12.5	12.5	0.75	46.75
7	Exp	E1	14:00:00	350	11	7	0.6	60	61.1111	38.8889	33.3333	0.222222	8.2	8.54462	1.91064	62.95	11.9801	2.67884	69	E2	09:15:00	355	17	3	0.3	30	85	15	15	0.7	5.55	5.96017	1.33274	39.95	12.271	2.74387	79	E3	18:00:00	355	15	5	0.5	50	75	25	25	0.5	4.1
8	Exp	E1	12:30:00	360	2	6	0.2	20	25	75	25	-0.5	24.4	8.72625	1.95125	45.7	25.2443	5.64479	7	E2	12:30:00	360	1	0	0	0	100	0	0	1	29.2	3.57771	0.8	32.35	10.5095	2.35	0	E3	12:30:00	360	1	2	0.1	10	33.3333	66.6667	33.3333	-0.333333	27.95
9	Exp	E1	11:00:00	375	4	5	0.4	40	44.4444	55.5556	44.4444	-0.111111	35.75	41.698	9.32396	64.75	34.9434	7.81358	25	E2	11:00:00	375	0	0	0	0	0	0	0	0	30	0	0	30	0	0	0	E3	11:00:00	375	5	8	0.5	50	38.4615	61.5385	38.4615	-0.230769	20.8
10	Exp	E1	11:55:00	305	10	10	0.8	80	50	50	40	0	6.3	6.69721	1.49754	64.45	10.8165	2.41865	76	E2	11:55:00	325	9	8	0.5	50	52.9412	47.0588	29.4118	0.0588235	13.3	9.50955	2.1264	52.95	17.5693	3.92862	80	E3	08:30:00	325	14	6	0.4	40	70	30	20	0.4	4.55
11	Exp	E1	11:30:00	435	6	12	0.6	60	33.3333	66.6667	33.3333	-0.333333	16.5	8.81685	1.97151	71	13.2665	2.96648	18	E2	10:20:00	435	3	10	0.3	30	23.0769	76.9231	23.0769	-0.538462	24.1	11.7245	2.62167	64.35	22.8249	5.1038	8	E3	10:45:00	435	2	8	0.2	20	20	80	20	-0.6	27.9
12	Exp	E1	11:10:00	450	4	2	0.2	20	66.6667	33.3333	33.3333	0.333333	28	4.36493	0.976028	50	17.7705	3.9736	6	E2	10:35:00	450	4	5	0.4	40	44.4444	55.5556	44.4444	-0.111111	25.7	7.54705	1.68757	40.55	7.81008	1.74639	8	E3	10:15:00	450	3	14	0.3	30	17.6471	82.3529	17.6471	-0.647059	17.4
1	Cont	E1	14:40:00	300	6	2	0.2	20	75	25	25	0.5	42.65	14.9394	3.34056	75.35	35.9316	8.03456	8	E2	14:40:00	300	6	2	0.2	20	75	25	25	0.5	29.35	8.5795	1.91844	49.05	22.8852	5.1173	15	E3	14:40:00	285	0	0	0	0	0	0	0	0	45.75
2	Cont	E1	10:30:00	375	1	1	0.1	10	50	50	50	0	57.4	18.9637	4.24041	65.35	21.1194	4.72244	0	E2	09:00:00	375	1	3	0.1	10	25	75	25	-0.5	36	11.7249	2.62177	51.25	35.9647	8.04195	2	E3	09:20:00	375	3	9	0.3	30	25	75	25	-0.5	26.05
3	Cont	E1	13:10:00	450	1	1	0.1	10	50	50	50	0	54.3	23.3466	5.22046	61.5	26.4943	5.9243	4	E2	12:00:00	450	0	1	0	0	0	100	0	-1	30	5.78564	1.29371	31.9	3.69779	0.826852	3	E3	10:00:00	450	3	3	0.3	30	50	50	50	0	38.65
4	Cont	E1	12:10:00	400	1	2	0.1	10	33.3333	66.6667	33.3333	-0.333333	29.45	10.7335	2.40008	42.15	23.0384	5.15153	14	E2	12:10:00	400	2	1	0.1	10	66.6667	33.3333	33.3333	0.333333	43.85	23.0589	5.15613	60.5	36.4092	25.7452	12	E3	16:50:00	400	1	3	0.1	10	25	75	25	-0.5	39.95
5	Cont	E1	11:15:00	375	0	1	0	0	0	100	0	-1	48.9	15.1585	3.38953	51.05	14.6304	3.27147	2	E2	11:15:00	375	1	3	0.1	10	25	75	25	-0.5	43.1	18.7614	4.19517	51.75	15.4405	3.45259	9	E3	11:35:00	375	0	2	0	0	0	100	0	-1	39.4
6	Cont	E1	10:00:00	400	3	3	0.2	20	50	50	33.3333	0	29.75	9.62385	2.15196	46.9	21.8148	4.87793	17	E2	09:30:00	400	4	4	0.4	40	50	50	50	0	30.15	16.875	3.77337	49.8	17.2432	3.85569	29	E3	10:30:00	400	8	1	0.1	10	88.8889	11.1111	11.1111	0.777778	25.35
7	Cont	E1	07:30:00	460	0	19	0	0	0	100	0	-1	8.45	7.81682	1.74789	39.3	9.8574	2.20418	80	E2	07:30:00	430	2	18	0.2	20	10	90	10	-0.8	3.1	2.93616	0.656546	61.35	5.05001	1.12922	74	E3	10:00:00	430	2	18	0.2	20	10	90	10	-0.8	2.65
8	Cont	E1	10:40:00	325	18	1	0.1	10	94.7368	5.26316	5.26316	0.894737	4.9	6.9502	1.55411	62.85	8.58564	1.91981	72	E2	10:40:00	325	15	5	0.3	30	75	25	15	0.5	2.65	1.75544	0.392529	63.35	2.8149	0.629432	115	E3	14:00:00	325	13	7	0.5	50	65	35	25	0.3	3.75
9	Cont	E1	10:00:00	480	8	11	0.8	80	42.1053	57.8947	42.1053	-0.157895	11.9	6.97288	1.55918	52	16.2869	3.64186	18	E2	10:00:00	480	6	4	0.3	30	60	40	30	0.2	25.15	7.45001	1.66587	45.65	19.1126	4.27371	8	E3	07:45:00	480	2	3	0.2	20	40	60	40	-0.2	28.4
[truncated: 24 more columns]
